# Supplementary material
Source: publisher figshare collection journal article supplement (https://gsajournals.figshare.com/ndownloader/files/18714683)
Supplement: Supplementary file 1 [file 18714683]

## Sheet: Sheet1
Code	Gene_id	CN152_24_readcount(CN152_24vsck)	ck_readcount(CN152_24vsck)	log2FoldChange(CN152_24vsck)	pval(CN152_24vsck)	padj(CN152_24vsck)	significant(CN152_24vsck)	biological_process	biological_process_description	cellular_component	cellular_component_description	molecular_function	molecular_function_description	KEGG AnnotInfo	KEGG url	Gene name	Interpro Description
1	Novel00039	112.618	334.826	-1.572	3.2405e-05	0.00040385	DOWN	--	--	--	--	--	--	--	--	--	--
2	Novel00163	145.667	1274.26	-3.1289	2.5727e-05	0.00033054	DOWN	--	--	GO:0016020//GO:0005575//GO:0044425//GO:0016021//GO:0031224	membrane//cellular_component//membrane part//integral component of membrane//intrinsic component of membrane	--	--	no KO assigned | (RefSeq) protein XRI1-like	http://www.genome.jp/dbget-bin/www_bget?sot:102603025	--	PREDICTED: protein XRI1-like [Solanum tuberosum]
3	Novel00172	1205.35	2948.91	-1.2907	2.6281e-05	0.00033678	DOWN	GO:0043412//GO:0008150//GO:0051234//GO:0006810//GO:0009987//GO:0071702//GO:0008152//GO:0071704//GO:0033036//GO:0044260//GO:0044267//GO:0036211//GO:0044238//GO:0045184//GO:0015031//GO:0051179//GO:0019538//GO:0044237//GO:0008104//GO:0043170//GO:0006464	macromolecule modification//biological_process//establishment of localization//transport//cellular process//organic substance transport//metabolic process//organic substance metabolic process//macromolecule localization//cellular macromolecule metabolic process//cellular protein metabolic process//protein modification process//primary metabolic process//establishment of protein localization//prot…	--	--	GO:0003674//GO:0005515//GO:0005488	molecular_function//protein binding//binding	K20217 ubiquitin-conjugating enzyme E2 E [EC:2.3.2.23] | (RefSeq) constitutive photomorphogenesis protein 10	http://www.genome.jp/dbget-bin/www_bget?sot:102601850	--	PREDICTED: constitutive photomorphogenesis protein 10-like isoform X1 [Solanum tuberosum]>gi|565375249|ref|XP_006354145.1| PREDICTED: constitutive photomorphogenesis protein 10-like isoform X2 [Solanum tuberosum]
4	Novel00277	676.611	1963.97	-1.5374	9.2473e-07	1.7586e-05	DOWN	GO:0006139//GO:1901360//GO:0044237//GO:0043170//GO:0016070//GO:0034641//GO:0010467//GO:0006397//GO:0006807//GO:0044238//GO:0046483//GO:0090304//GO:0016071//GO:0008152//GO:0044260//GO:0071704//GO:0006725//GO:0008150//GO:0009987//GO:0006396	nucleobase-containing compound metabolic process//organic cyclic compound metabolic process//cellular metabolic process//macromolecule metabolic process//RNA metabolic process//cellular nitrogen compound metabolic process//gene expression//mRNA processing//nitrogen compound metabolic process//primary metabolic process//heterocycle metabolic process//nucleic acid metabolic process//mRNA metabolic …	GO:0044424//GO:0043229//GO:0005623//GO:0005622//GO:0005634//GO:0044464//GO:0005737//GO:0005575//GO:0043231//GO:0043227//GO:0043226	intracellular part//intracellular organelle//cell//intracellular//nucleus//cell part//cytoplasm//cellular_component//intracellular membrane-bounded organelle//membrane-bounded organelle//organelle	GO:0005488//GO:0046872//GO:0005515//GO:0003723//GO:0046914//GO:0043169//GO:0008270//GO:0003674//GO:0043167//GO:0003676//GO:1901363//GO:0097159	binding//metal ion binding//protein binding//RNA binding//transition metal ion binding//cation binding//zinc ion binding//molecular_function//ion binding//nucleic acid binding//heterocyclic compound binding//organic cyclic compound binding	K10604 E3 ubiquitin-protein ligase MGRN1 [EC:2.3.2.27] | (RefSeq) probable E3 ubiquitin-protein ligase LUL4	http://www.genome.jp/dbget-bin/www_bget?sot:102597784	--	PREDICTED: probable E3 ubiquitin-protein ligase LUL4-like [Solanum tuberosum]
5	Novel00282	47.3817	139.729	-1.5602	0.0010532	0.0077443	DOWN	GO:0043170//GO:0009059//GO:0044237//GO:0044271//GO:0006139//GO:1901360//GO:0044238//GO:0046483//GO:0090304//GO:0010467//GO:0009058//GO:0006807//GO:0018130//GO:0034654//GO:0016070//GO:0034641//GO:0032774//GO:0071704//GO:0097659//GO:0034645//GO:0006351//GO:0006725//GO:1901576//GO:0044260//GO:0008152//GO:0009987//GO:1901362//GO:0019438//GO:0044249//GO:0008150	macromolecule metabolic process//macromolecule biosynthetic process//cellular metabolic process//cellular nitrogen compound biosynthetic process//nucleobase-containing compound metabolic process//organic cyclic compound metabolic process//primary metabolic process//heterocycle metabolic process//nucleic acid metabolic process//gene expression//biosynthetic process//nitrogen compound metabolic pro…	--	--	GO:0004857//GO:0098772//GO:0030414//GO:0005488//GO:0003899//GO:0003677//GO:0016772//GO:0061134//GO:0034062//GO:0016779//GO:0003674//GO:0030234//GO:0097159//GO:1901363//GO:0003676//GO:0003824//GO:0016740	enzyme inhibitor activity//molecular function regulator//peptidase inhibitor activity//binding//DNA-directed 5'-3' RNA polymerase activity//DNA binding//transferase activity, transferring phosphorus-containing groups//peptidase regulator activity//5'-3' RNA polymerase activity//nucleotidyltransferase activity//molecular_function//enzyme regulator activity//organic cyclic compound binding//heteroc…	no KO assigned | (RefSeq) disease resistance RPP13-like protein 4	http://www.genome.jp/dbget-bin/www_bget?sot:102592178	--	PREDICTED: disease resistance RPP13-like protein 4-like [Solanum tuberosum]
6	Novel00369	1035.2	3288.71	-1.6676	7.2074e-08	1.7555e-06	DOWN	GO:0090150//GO:0070727//GO:0006886//GO:0045184//GO:0016043//GO:0015031//GO:0071840//GO:0051179//GO:0072657//GO:0008104//GO:0006612//GO:0051234//GO:0006605//GO:0006810//GO:0008150//GO:0009987//GO:0006613//GO:0061024//GO:0046907//GO:0051641//GO:0071702//GO:0051649//GO:0034613//GO:0033036	establishment of protein localization to membrane//cellular macromolecule localization//intracellular protein transport//establishment of protein localization//cellular component organization//protein transport//cellular component organization or biogenesis//localization//protein localization to membrane//protein localization//protein targeting to membrane//establishment of localization//protein …	GO:0005791//GO:0044444//GO:0005623//GO:0044432//GO:0044464//GO:0031300//GO:0012505//GO:0031224//GO:0005784//GO:0005622//GO:0044424//GO:0044425//GO:0031090//GO:0044446//GO:0043229//GO:0030867//GO:0016021//GO:0044422//GO:0071256//GO:0098796//GO:0005783//GO:0043226//GO:0042175//GO:0031301//GO:0031227//GO:0030176//GO:0005789//GO:0005737//GO:0032991//GO:0098588//GO:0016020//GO:0043227//GO:0043231//GO:…	rough endoplasmic reticulum//cytoplasmic part//cell//endoplasmic reticulum part//cell part//intrinsic component of organelle membrane//endomembrane system//intrinsic component of membrane//Sec61 translocon complex//intracellular//intracellular part//membrane part//organelle membrane//intracellular organelle part//intracellular organelle//rough endoplasmic reticulum membrane//integral component of…	--	--	no KO assigned | (RefSeq) WAT1-related protein At1g09380-like	http://www.genome.jp/dbget-bin/www_bget?sot:102591987	--	PREDICTED: WAT1-related protein At1g09380-like isoform X1 [Solanum tuberosum]
7	Novel00456	4270.03	16375.1	-1.9392	1.4247e-10	5.5973e-09	DOWN	GO:0006629//GO:0032774//GO:0016070//GO:0034641//GO:0034654//GO:0008202//GO:0018130//GO:0006807//GO:0009058//GO:0010467//GO:0090304//GO:0046483//GO:0044238//GO:1901360//GO:0006139//GO:0044271//GO:0044237//GO:0009059//GO:0043170//GO:0008150//GO:0006353//GO:0044249//GO:0006694//GO:0019438//GO:0055114//GO:0008610//GO:1901362//GO:0009987//GO:0008152//GO:0044260//GO:1901576//GO:0006725//GO:0097659//GO:…	lipid metabolic process//RNA biosynthetic process//RNA metabolic process//cellular nitrogen compound metabolic process//nucleobase-containing compound biosynthetic process//steroid metabolic process//heterocycle biosynthetic process//nitrogen compound metabolic process//biosynthetic process//gene expression//nucleic acid metabolic process//heterocycle metabolic process//primary metabolic process/…	--	--	GO:0033764//GO:0008144//GO:0003723//GO:0005488//GO:0016616//GO:0048037//GO:0016614//GO:0016229//GO:0016491//GO:0003824//GO:0003676//GO:1901363//GO:0097159//GO:0050662//GO:0003854//GO:0003674	steroid dehydrogenase activity, acting on the CH-OH group of donors, NAD or NADP as acceptor//drug binding//RNA binding//binding//oxidoreductase activity, acting on the CH-OH group of donors, NAD or NADP as acceptor//cofactor binding//oxidoreductase activity, acting on CH-OH group of donors//steroid dehydrogenase activity//oxidoreductase activity//catalytic activity//nucleic acid binding//heteroc…	no KO assigned | (RefSeq) cinnamoyl-CoA reductase 1-like	http://www.genome.jp/dbget-bin/www_bget?sot:102584718	--	PREDICTED: cinnamoyl-CoA reductase 1-like [Solanum tuberosum]
8	Novel00508	79.4343	193.525	-1.2847	0.0025551	0.015962	DOWN	--	--	--	--	--	--	--	--	--	--
9	Novel00515	37.1093	112.834	-1.6043	0.0015426	0.010607	DOWN	--	--	--	--	--	--	--	--	--	Gag-pol protein, putative [Solanum demissum]
10	Novel00518	144.725	357.062	-1.3029	0.00044833	0.0037931	DOWN	--	--	--	--	--	--	--	--	--	--
11	Novel00646	375.834	804.11	-1.0973	0.0035272	0.020686	DOWN	GO:0008152//GO:0055114//GO:0008150	metabolic process//oxidation-reduction process//biological_process	--	--	GO:0043167//GO:0003674//GO:0005507//GO:0003824//GO:0016491//GO:0046872//GO:0005488//GO:0043169//GO:0046914	ion binding//molecular_function//copper ion binding//catalytic activity//oxidoreductase activity//metal ion binding//binding//cation binding//transition metal ion binding	--	--	--	PREDICTED: uncharacterized protein LOC104221718 [Nicotiana sylvestris]
12	Novel00650	79.4412	275.308	-1.7931	8.1376e-06	0.00012123	DOWN	GO:0010467//GO:0006807//GO:0009058//GO:0045892//GO:0046483//GO:0044238//GO:0031324//GO:0090304//GO:0016070//GO:0034641//GO:0010468//GO:0045934//GO:0051172//GO:0032774//GO:0065007//GO:0048523//GO:0031327//GO:0050794//GO:0018130//GO:0010556//GO:0060255//GO:0034654//GO:0019219//GO:0009059//GO:0043170//GO:0019222//GO:0009892//GO:0006139//GO:1901360//GO:0044271//GO:0044237//GO:0010629//GO:0048519//GO:…	gene expression//nitrogen compound metabolic process//biosynthetic process//negative regulation of transcription, DNA-templated//heterocycle metabolic process//primary metabolic process//negative regulation of cellular metabolic process//nucleic acid metabolic process//RNA metabolic process//cellular nitrogen compound metabolic process//regulation of gene expression//negative regulation of nucleo…	GO:0005622//GO:0005634//GO:0044464//GO:0005623//GO:0043229//GO:0044424//GO:0043226//GO:0005575//GO:0043231//GO:0043227	intracellular//nucleus//cell part//cell//intracellular organelle//intracellular part//organelle//cellular_component//intracellular membrane-bounded organelle//membrane-bounded organelle	--	--	no KO assigned | (RefSeq) uncharacterized LOC102601371	http://www.genome.jp/dbget-bin/www_bget?sot:102601371	--	PREDICTED: scopoletin glucosyltransferase-like [Solanum tuberosum]
13	Novel00693	41.4996	116.436	-1.4884	0.0035802	0.020943	DOWN	--	--	--	--	--	--	--	--	--	--
14	Novel00723	215.595	560.404	-1.3781	6.1577e-05	0.00070859	DOWN	GO:0008150//GO:0032200//GO:0009987//GO:0042592//GO:0051276//GO:0008152//GO:0065008//GO:0044260//GO:0071704//GO:0006725//GO:0034641//GO:0065007//GO:0006259//GO:0071840//GO:0006996//GO:0060249//GO:0006807//GO:0044238//GO:0046483//GO:0016043//GO:0090304//GO:0006139//GO:1901360//GO:0044237//GO:0000723//GO:0043170	biological_process//telomere organization//cellular process//homeostatic process//chromosome organization//metabolic process//regulation of biological quality//cellular macromolecule metabolic process//organic substance metabolic process//cellular aromatic compound metabolic process//cellular nitrogen compound metabolic process//biological regulation//DNA metabolic process//cellular component org…	GO:0000784//GO:0000228//GO:0098687//GO:0043226//GO:0043233//GO:0070013//GO:0000781//GO:0043231//GO:0005575//GO:0043227//GO:0044427//GO:0043228//GO:0005623//GO:0031974//GO:0005634//GO:0005622//GO:0044464//GO:0043232//GO:0044424//GO:0031981//GO:0044446//GO:0043229//GO:0044422//GO:0005694//GO:0044428//GO:0044454	nuclear chromosome, telomeric region//nuclear chromosome//chromosomal region//organelle//organelle lumen//intracellular organelle lumen//chromosome, telomeric region//intracellular membrane-bounded organelle//cellular_component//membrane-bounded organelle//chromosomal part//non-membrane-bounded organelle//cell//membrane-enclosed lumen//nucleus//intracellular//cell part//intracellular non-membrane…	GO:1901363//GO:0003676//GO:0097159//GO:0003674//GO:0003677//GO:0005488	heterocyclic compound binding//nucleic acid binding//organic cyclic compound binding//molecular_function//DNA binding//binding	--	--	--	PREDICTED: putative ribonuclease H protein At1g65750-like [Solanum tuberosum]
15	Novel00726	42.3839	127.705	-1.5912	0.0012606	0.0089642	DOWN	--	--	--	--	GO:0043169//GO:0005515//GO:0046914//GO:0005488//GO:0046872//GO:0008270//GO:0043167//GO:0003674	cation binding//protein binding//transition metal ion binding//binding//metal ion binding//zinc ion binding//ion binding//molecular_function	no KO assigned | (RefSeq) protein BONZAI 3	http://www.genome.jp/dbget-bin/www_bget?sot:102585434	--	PREDICTED: protein BONZAI 3-like isoform X2 [Solanum tuberosum]
16	Novel00796	94.6749	346.016	-1.8698	0.0025535	0.015956	DOWN	GO:0009059//GO:0019219//GO:0019222//GO:0043170//GO:0044271//GO:1901360//GO:0006139//GO:0006950//GO:0044237//GO:0009058//GO:0006807//GO:0010467//GO:0090304//GO:0044238//GO:0046483//GO:0065007//GO:0032774//GO:0010468//GO:0034641//GO:0016070//GO:0034654//GO:0060255//GO:0010556//GO:0018130//GO:0050794//GO:0006952//GO:0050896//GO:2001141//GO:0044260//GO:1901576//GO:0006725//GO:0034645//GO:0006351//GO:…	macromolecule biosynthetic process//regulation of nucleobase-containing compound metabolic process//regulation of metabolic process//macromolecule metabolic process//cellular nitrogen compound biosynthetic process//organic cyclic compound metabolic process//nucleobase-containing compound metabolic process//response to stress//cellular metabolic process//biosynthetic process//nitrogen compound met…	GO:0005576//GO:0005575	extracellular region//cellular_component	--	--	--	--	--	--
17	Novel00819	15.7761	61.3079	-1.9583	0.0028151	0.017243	DOWN	GO:0044403//GO:0016032//GO:0051704//GO:0044419//GO:0044764//GO:0008150//GO:0009987	symbiont process//viral process//multi-organism process//interspecies interaction between organisms//multi-organism cellular process//biological_process//cellular process	--	--	GO:0005488//GO:0046983//GO:0005515//GO:0003674	binding//protein dimerization activity//protein binding//molecular_function	--	--	--	PREDICTED: uncharacterized protein LOC104644328 [Solanum lycopersicum]
18	Novel00835	122.494	264.208	-1.109	0.0040524	0.023146	DOWN	--	--	GO:0043226//GO:0005737//GO:0043231//GO:0005575//GO:0005739//GO:0043227//GO:0005623//GO:0044444//GO:0005622//GO:0044464//GO:0044424//GO:0043229	organelle//cytoplasm//intracellular membrane-bounded organelle//cellular_component//mitochondrion//membrane-bounded organelle//cell//cytoplasmic part//intracellular//cell part//intracellular part//intracellular organelle	--	--	K08592 sentrin-specific protease 1 [EC:3.4.22.68] | (RefSeq) ubiquitin-like-specific protease ESD4	http://www.genome.jp/dbget-bin/www_bget?sot:102605421	--	PREDICTED: ubiquitin-like-specific protease ESD4-like [Solanum tuberosum]
19	Novel00863	5448.87	12005.5	-1.1397	0.00012821	0.0013276	DOWN	GO:0016070//GO:0006366//GO:0034641//GO:0032774//GO:0018130//GO:0034654//GO:0010467//GO:0009058//GO:0006807//GO:0046483//GO:0044238//GO:0090304//GO:0044271//GO:0006139//GO:1901360//GO:0006367//GO:0044237//GO:0009059//GO:0043170//GO:0044249//GO:0008150//GO:0006352//GO:0019438//GO:0009987//GO:1901362//GO:0008152//GO:1901576//GO:0044260//GO:0071704//GO:0097659//GO:0006351//GO:0034645//GO:0006725	RNA metabolic process//transcription by RNA polymerase II//cellular nitrogen compound metabolic process//RNA biosynthetic process//heterocycle biosynthetic process//nucleobase-containing compound biosynthetic process//gene expression//biosynthetic process//nitrogen compound metabolic process//heterocycle metabolic process//primary metabolic process//nucleic acid metabolic process//cellular nitrog…	GO:0090575//GO:0005672//GO:0005623//GO:0055029//GO:0031974//GO:0005634//GO:0000428//GO:0005622//GO:0044464//GO:0044798//GO:0044424//GO:0031981//GO:0005654//GO:0043229//GO:0044446//GO:0044422//GO:0044428//GO:0005667//GO:0061695//GO:0043226//GO:0043233//GO:1990234//GO:0016591//GO:0044451//GO:1902494//GO:0030880//GO:0070013//GO:0043231//GO:0005575//GO:0032991//GO:0043227	RNA polymerase II transcription factor complex//transcription factor TFIIA complex//cell//nuclear DNA-directed RNA polymerase complex//membrane-enclosed lumen//nucleus//DNA-directed RNA polymerase complex//intracellular//cell part//nuclear transcription factor complex//intracellular part//nuclear lumen//nucleoplasm//intracellular organelle//intracellular organelle part//organelle part//nuclear pa…	GO:0003723//GO:0005488//GO:1901363//GO:0003676//GO:0097159//GO:0003674	RNA binding//binding//heterocyclic compound binding//nucleic acid binding//organic cyclic compound binding//molecular_function	no KO assigned | (RefSeq) DNA-binding protein-like	http://www.genome.jp/dbget-bin/www_bget?sot:102577643	--	PREDICTED: polyadenylate-binding protein RBP47 isoform X2 [Solanum tuberosum]
20	Novel00921	258.924	798.489	-1.6247	1.1333e-06	2.1041e-05	DOWN	--	--	--	--	--	--	--	--	--	--
21	Novel00959	188.023	680.719	-1.8562	2.9952e-05	0.00037796	DOWN	GO:0055114//GO:0008150//GO:0008152	oxidation-reduction process//biological_process//metabolic process	GO:0005575//GO:0005886//GO:0016020//GO:0071944//GO:0044464//GO:0005623	cellular_component//plasma membrane//membrane//cell periphery//cell part//cell	GO:0016491//GO:0003824//GO:0016651//GO:0003674//GO:0016655	oxidoreductase activity//catalytic activity//oxidoreductase activity, acting on NAD(P)H//molecular_function//oxidoreductase activity, acting on NAD(P)H, quinone or similar compound as acceptor	K15340 DNA cross-link repair 1A protein | (RefSeq) 5' exonuclease Apollo	http://www.genome.jp/dbget-bin/www_bget?sot:102606437	--	PREDICTED: 5' exonuclease Apollo-like [Solanum tuberosum]
22	Novel00987	20.7174	147.183	-2.8287	4.5226e-08	1.1318e-06	DOWN	GO:1901576//GO:0044260//GO:2001141//GO:0071704//GO:0097659//GO:0006351//GO:0034645//GO:0006725//GO:1903506//GO:0051252//GO:0008152//GO:0051171//GO:0009987//GO:0080090//GO:1901362//GO:0009889//GO:0050789//GO:0031323//GO:0044249//GO:0031326//GO:0008150//GO:0006355//GO:2000112//GO:0019438//GO:0019219//GO:0009059//GO:0043170//GO:0019222//GO:0006139//GO:1901360//GO:0044271//GO:0044237//GO:0006950//GO:…	organic substance biosynthetic process//cellular macromolecule metabolic process//regulation of RNA biosynthetic process//organic substance metabolic process//nucleic acid-templated transcription//transcription, DNA-templated//cellular macromolecule biosynthetic process//cellular aromatic compound metabolic process//regulation of nucleic acid-templated transcription//regulation of RNA metabolic p…	GO:0005575//GO:0005576	cellular_component//extracellular region	--	--	--	--	--	--
23	Novel00994	140.302	302.229	-1.1071	0.0031074	0.018711	DOWN	--	--	--	--	--	--	--	--	--	PREDICTED: putative ribonuclease H protein At1g65750-like [Solanum tuberosum]
24	Novel00995	6.01524	31.6199	-2.3941	0.0089032	0.043177	DOWN	--	--	--	--	--	--	--	--	--	Polyprotein, putative [Solanum demissum]
25	Novel01000	1.49054	18.046	-3.5978	0.0088593	0.043062	DOWN	--	--	--	--	--	--	--	--	--	PREDICTED: uncharacterized protein LOC102590577 [Solanum tuberosum]
26	Novel01021	914.596	2076.98	-1.1833	0.00011095	0.0011767	DOWN	GO:0044271//GO:0006139//GO:1901360//GO:0044237//GO:0009059//GO:0019219//GO:0019222//GO:0043170//GO:0010468//GO:0032774//GO:0065007//GO:0016070//GO:0034641//GO:0010556//GO:0060255//GO:0034654//GO:0050794//GO:0018130//GO:0009058//GO:0019538//GO:0006807//GO:0010467//GO:0090304//GO:0044238//GO:0046483//GO:0006508//GO:1903506//GO:0008152//GO:0051252//GO:1901576//GO:0044260//GO:2001141//GO:0006725//GO:…	cellular nitrogen compound biosynthetic process//nucleobase-containing compound metabolic process//organic cyclic compound metabolic process//cellular metabolic process//macromolecule biosynthetic process//regulation of nucleobase-containing compound metabolic process//regulation of metabolic process//macromolecule metabolic process//regulation of gene expression//RNA biosynthetic process//biolog…	--	--	GO:0005488//GO:0008233//GO:0003677//GO:0016787//GO:0003674//GO:0003700//GO:0008236//GO:0017171//GO:0043565//GO:0003824//GO:1901363//GO:0003676//GO:0097159//GO:0070011	binding//peptidase activity//DNA binding//hydrolase activity//molecular_function//DNA-binding transcription factor activity//serine-type peptidase activity//serine hydrolase activity//sequence-specific DNA binding//catalytic activity//heterocyclic compound binding//nucleic acid binding//organic cyclic compound binding//peptidase activity, acting on L-amino acid peptides	K01285 lysosomal Pro-X carboxypeptidase [EC:3.4.16.2] | (RefSeq) lysosomal Pro-X carboxypeptidase-like	http://www.genome.jp/dbget-bin/www_bget?sot:102578651	--	PREDICTED: lysosomal Pro-X carboxypeptidase-like [Solanum tuberosum]
27	Novel01023	313.592	672.886	-1.1015	0.0011778	0.0084909	DOWN	GO:0006260//GO:0009987//GO:0008150//GO:0044249//GO:1901576//GO:0044260//GO:0006725//GO:0071704//GO:0034645//GO:0008152//GO:0009058//GO:0006807//GO:0090304//GO:0046483//GO:0044238//GO:0006259//GO:0034641//GO:0009059//GO:0043170//GO:0006139//GO:1901360//GO:0044237	DNA replication//cellular process//biological_process//cellular biosynthetic process//organic substance biosynthetic process//cellular macromolecule metabolic process//cellular aromatic compound metabolic process//organic substance metabolic process//cellular macromolecule biosynthetic process//metabolic process//biosynthetic process//nitrogen compound metabolic process//nucleic acid metabolic pr…	GO:0043226//GO:0043231//GO:0005575//GO:0043227//GO:0005634//GO:0005622//GO:0044464//GO:0005623//GO:0043229//GO:0044424	organelle//intracellular membrane-bounded organelle//cellular_component//membrane-bounded organelle//nucleus//intracellular//cell part//cell//intracellular organelle//intracellular part	GO:0004518//GO:0097159//GO:0016740//GO:0016788//GO:0003824//GO:1901363//GO:0003676//GO:0036094//GO:0003674//GO:0016779//GO:0043167//GO:0016787//GO:0008270//GO:0003887//GO:0008408//GO:0046914//GO:0043169//GO:0016772//GO:0003677//GO:0000166//GO:0034061//GO:0004527//GO:1901265//GO:0046872//GO:0005488	nuclease activity//organic cyclic compound binding//transferase activity//hydrolase activity, acting on ester bonds//catalytic activity//heterocyclic compound binding//nucleic acid binding//small molecule binding//molecular_function//nucleotidyltransferase activity//ion binding//hydrolase activity//zinc ion binding//DNA-directed DNA polymerase activity//3'-5' exonuclease activity//transition meta…	K02324 DNA polymerase epsilon subunit 1 [EC:2.7.7.7] | (RefSeq) DNA polymerase epsilon catalytic subunit A-like	http://www.genome.jp/dbget-bin/www_bget?sot:102599922	--	PREDICTED: DNA polymerase epsilon catalytic subunit A-like [Solanum tuberosum]
28	Novel01066	1492	8422.98	-2.4971	8.5171e-10	2.929e-08	DOWN	GO:0043170//GO:1901360//GO:0006139//GO:0044237//GO:0010467//GO:0006807//GO:0046483//GO:0044238//GO:0090304//GO:0034641//GO:0016070//GO:0044260//GO:0005975//GO:0071704//GO:0006725//GO:0008152//GO:0009987//GO:0006396//GO:0008150	macromolecule metabolic process//organic cyclic compound metabolic process//nucleobase-containing compound metabolic process//cellular metabolic process//gene expression//nitrogen compound metabolic process//heterocycle metabolic process//primary metabolic process//nucleic acid metabolic process//cellular nitrogen compound metabolic process//RNA metabolic process//cellular macromolecule metabolic…	--	--	GO:0017076//GO:0004540//GO:0097367//GO:0016893//GO:0004525//GO:1901265//GO:0005488//GO:0032549//GO:0032559//GO:0016798//GO:0043168//GO:0003723//GO:0005515//GO:0004519//GO:0004521//GO:0001882//GO:0000166//GO:0003677//GO:0016891//GO:0001883//GO:0032296//GO:0003674//GO:0036094//GO:0043167//GO:0035639//GO:0032555//GO:0032550//GO:0016787//GO:0004553//GO:0032553//GO:0005524//GO:0004518//GO:0097159//GO:…	purine nucleotide binding//ribonuclease activity//carbohydrate derivative binding//endonuclease activity, active with either ribo- or deoxyribonucleic acids and producing 5'-phosphomonoesters//ribonuclease III activity//nucleoside phosphate binding//binding//ribonucleoside binding//adenyl ribonucleotide binding//hydrolase activity, acting on glycosyl bonds//anion binding//RNA binding//protein bin…	K11592 endoribonuclease Dicer [EC:3.1.26.-] | (RefSeq) dicer-like protein 4	http://www.genome.jp/dbget-bin/www_bget?sot:102601788	--	PREDICTED: endoribonuclease Dicer homolog 2-like isoform X3 [Solanum lycopersicum]
29	Novel01071	265.209	873.975	-1.7205	2.9532e-07	6.3272e-06	DOWN	--	--	--	--	--	--	no KO assigned | (RefSeq) CAP-Gly domain-containing linker protein 1-like	http://www.genome.jp/dbget-bin/www_bget?sot:102594827	--	PREDICTED: girdin-like [Solanum lycopersicum]
30	Novel01076	575.544	1671.01	-1.5377	9.6495e-07	1.8257e-05	DOWN	GO:0006139//GO:1901360//GO:0044271//GO:0055085//GO:0006812//GO:0072522//GO:0042278//GO:0006753//GO:0044237//GO:0009156//GO:0006811//GO:1902600//GO:1901659//GO:0009161//GO:0009206//GO:0019693//GO:0034641//GO:0009259//GO:0090407//GO:0009165//GO:0009116//GO:0072521//GO:0018130//GO:0009119//GO:1901135//GO:0034654//GO:0051179//GO:0009124//GO:0009150//GO:0006807//GO:0009058//GO:0046483//GO:0044238//GO:…	nucleobase-containing compound metabolic process//organic cyclic compound metabolic process//cellular nitrogen compound biosynthetic process//transmembrane transport//cation transport//purine-containing compound biosynthetic process//purine nucleoside metabolic process//nucleoside phosphate metabolic process//cellular metabolic process//ribonucleoside monophosphate biosynthetic process//ion trans…	GO:0000276//GO:0031966//GO:0045259//GO:0044424//GO:0044425//GO:0044422//GO:0043229//GO:0044446//GO:0005753//GO:0031090//GO:0031967//GO:0045263//GO:0044444//GO:0005623//GO:0019866//GO:0005622//GO:0044464//GO:0044455//GO:0005737//GO:0005575//GO:0043231//GO:0016469//GO:0005739//GO:0032991//GO:0044429//GO:0016020//GO:0043227//GO:0098796//GO:0005743//GO:0098798//GO:0033177//GO:0098800//GO:0043226//GO:…	mitochondrial proton-transporting ATP synthase complex, coupling factor F(o)//mitochondrial membrane//proton-transporting ATP synthase complex//intracellular part//membrane part//organelle part//intracellular organelle//intracellular organelle part//mitochondrial proton-transporting ATP synthase complex//organelle membrane//organelle envelope//proton-transporting ATP synthase complex, coupling fa…	GO:0015078//GO:0022890//GO:0008324//GO:0015075//GO:0005215//GO:0015077//GO:0003674//GO:0022857	proton transmembrane transporter activity//inorganic cation transmembrane transporter activity//cation transmembrane transporter activity//ion transmembrane transporter activity//transporter activity//monovalent inorganic cation transmembrane transporter activity//molecular_function//transmembrane transporter activity	no KO assigned | (RefSeq) putative late blight resistance protein homolog R1B-12	http://www.genome.jp/dbget-bin/www_bget?sot:102583714	--	PREDICTED: uncharacterized protein LOC102583714 [Solanum tuberosum]
31	Novel01077	47.8773	179.581	-1.9072	3.0689e-05	0.00038561	DOWN	GO:0008150//GO:0055114//GO:0008152	biological_process//oxidation-reduction process//metabolic process	--	--	GO:0016705//GO:0020037//GO:0046914//GO:0043169//GO:0005488//GO:0046872//GO:0016491//GO:1901363//GO:0003824//GO:0097159//GO:0005506//GO:0046906//GO:0003674//GO:0043167	oxidoreductase activity, acting on paired donors, with incorporation or reduction of molecular oxygen//heme binding//transition metal ion binding//cation binding//binding//metal ion binding//oxidoreductase activity//heterocyclic compound binding//catalytic activity//organic cyclic compound binding//iron ion binding//tetrapyrrole binding//molecular_function//ion binding	no KO assigned | (RefSeq) cytochrome P450 71B9-like	http://www.genome.jp/dbget-bin/www_bget?sot:102582723	--	PREDICTED: cytochrome P450 83B1-like [Solanum tuberosum]
32	Novel01095	2.11738	32.8624	-3.9561	0.00019908	0.0019369	DOWN	--	--	--	--	--	--	no KO assigned | (RefSeq) uncharacterized LOC102596447	http://www.genome.jp/dbget-bin/www_bget?sot:102596447	--	PREDICTED: uncharacterized protein LOC102596447 [Solanum tuberosum]
33	Novel01179	36.8058	99.0018	-1.4275	0.0070524	0.036081	DOWN	GO:0019538//GO:0007165//GO:0044238//GO:0065007//GO:0050794//GO:0050896//GO:0007154//GO:0043170//GO:0051716//GO:0009987//GO:0008150//GO:0050789//GO:0023052//GO:0016055//GO:0071704//GO:0006508//GO:0007166//GO:0008152	protein metabolic process//signal transduction//primary metabolic process//biological regulation//regulation of cellular process//response to stimulus//cell communication//macromolecule metabolic process//cellular response to stimulus//cellular process//biological_process//regulation of biological process//signaling//Wnt signaling pathway//organic substance metabolic process//proteolysis//cell su…	--	--	GO:0008233//GO:0070011//GO:0017171//GO:0003824//GO:0003674//GO:0008236//GO:0004175//GO:0016787//GO:0004252	peptidase activity//peptidase activity, acting on L-amino acid peptides//serine hydrolase activity//catalytic activity//molecular_function//serine-type peptidase activity//endopeptidase activity//hydrolase activity//serine-type endopeptidase activity	no KO assigned | (RefSeq) subtilisin-like protease SBT5.3	http://www.genome.jp/dbget-bin/www_bget?sot:102604627	--	PREDICTED: subtilisin-like protease-like, partial [Solanum tuberosum]
34	Novel01191	972.898	1989.19	-1.0318	0.00093115	0.0069939	DOWN	--	--	--	--	--	--	--	--	--	--
35	Novel01251	3.31513	31.7155	-3.2581	0.00095777	0.0071594	DOWN	GO:0051704//GO:0016032//GO:0044403//GO:0044764//GO:0044419//GO:0009987//GO:0008150	multi-organism process//viral process//symbiont process//multi-organism cellular process//interspecies interaction between organisms//cellular process//biological_process	--	--	GO:0005488//GO:0005515//GO:0046983//GO:0003674	binding//protein binding//protein dimerization activity//molecular_function	--	--	--	PREDICTED: uncharacterized protein LOC104644328 [Solanum lycopersicum]
36	Novel01276	15.4819	94.9106	-2.616	8.7229e-06	0.00012879	DOWN	--	--	--	--	GO:0003723//GO:0046914//GO:0043169//GO:0046872//GO:0005488//GO:0097159//GO:0003676//GO:1901363//GO:0003674//GO:0043167//GO:0008270	RNA binding//transition metal ion binding//cation binding//metal ion binding//binding//organic cyclic compound binding//nucleic acid binding//heterocyclic compound binding//molecular_function//ion binding//zinc ion binding	no KO assigned | (RefSeq) aspartic proteinase-like protein 2	http://www.genome.jp/dbget-bin/www_bget?sot:102582397	--	hypothetical protein VITISV_007944 [Vitis vinifera]
37	Novel01409	62.2938	142.96	-1.1984	0.0075809	0.038181	DOWN	GO:0044237//GO:0043170//GO:0006464//GO:0070647//GO:0044267//GO:0070646//GO:0036211//GO:0016579//GO:0044238//GO:0019538//GO:0008152//GO:0006508//GO:0071704//GO:0044260//GO:0043412//GO:0008150//GO:0009987	cellular metabolic process//macromolecule metabolic process//cellular protein modification process//protein modification by small protein conjugation or removal//cellular protein metabolic process//protein modification by small protein removal//protein modification process//protein deubiquitination//primary metabolic process//protein metabolic process//metabolic process//proteolysis//organic subs…	--	--	GO:0036459//GO:0016787//GO:0003674//GO:0003824	thiol-dependent ubiquitinyl hydrolase activity//hydrolase activity//molecular_function//catalytic activity	K11855 ubiquitin carboxyl-terminal hydrolase 36/42 [EC:3.4.19.12] | (RefSeq) ubiquitin carboxyl-terminal hydrolase 18	http://www.genome.jp/dbget-bin/www_bget?sot:102580922	--	PREDICTED: ubiquitin carboxyl-terminal hydrolase 18-like [Solanum tuberosum]
38	Novel01507	498.928	1107.53	-1.1504	0.00035603	0.0031395	DOWN	GO:0007610//GO:0071704//GO:0035737//GO:0006508//GO:0035738//GO:0044562//GO:0008152//GO:0008150//GO:0044560//GO:0051704//GO:0043170//GO:0044559//GO:0019538//GO:0044238//GO:0051705//GO:0044564	behavior//organic substance metabolic process//injection of substance in to other organism//proteolysis//envenomation resulting in modification of morphology or physiology of other organism//envenomation resulting in negative regulation of voltage-gated potassium channel activity in other organism//metabolic process//biological_process//envenomation resulting in modulation of ion channel activity…	--	--	GO:0003674//GO:0016787//GO:0004180//GO:0070011//GO:0016740//GO:0003824//GO:0008233//GO:0008238//GO:0016772	molecular_function//hydrolase activity//carboxypeptidase activity//peptidase activity, acting on L-amino acid peptides//transferase activity//catalytic activity//peptidase activity//exopeptidase activity//transferase activity, transferring phosphorus-containing groups	no KO assigned | (RefSeq) protein SCAR1	http://www.genome.jp/dbget-bin/www_bget?sot:102591859	--	PREDICTED: protein SCAR1-like isoform X1 [Solanum tuberosum]
39	Novel01557	2396.34	4920.81	-1.0381	0.00056838	0.0046059	DOWN	--	--	--	--	GO:0005488//GO:0005515//GO:0003674	binding//protein binding//molecular_function	K18756 protein bicaudal C | (RefSeq) protein bicaudal C homolog 1-like	http://www.genome.jp/dbget-bin/www_bget?sot:102579467	--	PREDICTED: protein bicaudal C homolog 1-like isoform X1 [Solanum tuberosum]
40	Novel01558	166.286	337.069	-1.0194	0.0060909	0.032145	DOWN	--	--	GO:0016020//GO:0005575//GO:0016021//GO:0044425//GO:0031224	membrane//cellular_component//integral component of membrane//membrane part//intrinsic component of membrane	--	--	no KO assigned | (RefSeq) WAT1-related protein At3g28050-like	http://www.genome.jp/dbget-bin/www_bget?sot:102584112	--	PREDICTED: WAT1-related protein At3g28050-like [Solanum tuberosum]
41	Novel01602	1495.8	5331.28	-1.8336	2.2294e-09	7.1545e-08	DOWN	GO:0044260//GO:1901576//GO:2001141//GO:0097659//GO:0071704//GO:0006351//GO:0034645//GO:0006725//GO:1903506//GO:0032505//GO:1903047//GO:0090529//GO:0061640//GO:0051252//GO:1902410//GO:0000917//GO:0008152//GO:0000281//GO:0000278//GO:0006260//GO:0009056//GO:0051171//GO:0009987//GO:0080090//GO:0044248//GO:1901362//GO:0009889//GO:0050789//GO:0031323//GO:0044249//GO:0006914//GO:0008150//GO:0031326//GO:…	cellular macromolecule metabolic process//organic substance biosynthetic process//regulation of RNA biosynthetic process//nucleic acid-templated transcription//organic substance metabolic process//transcription, DNA-templated//cellular macromolecule biosynthetic process//cellular aromatic compound metabolic process//regulation of nucleic acid-templated transcription//reproduction of a single-cell…	GO:0005575//GO:0043231//GO:0043227//GO:0005737//GO:0043226//GO:0043229//GO:0044424//GO:0005622//GO:0005634//GO:0044464//GO:0005623	cellular_component//intracellular membrane-bounded organelle//membrane-bounded organelle//cytoplasm//organelle//intracellular organelle//intracellular part//intracellular//nucleus//cell part//cell	GO:0003674//GO:0003700//GO:0097159//GO:0043565//GO:0003676//GO:1901363//GO:0005488//GO:0003677	molecular_function//DNA-binding transcription factor activity//organic cyclic compound binding//sequence-specific DNA binding//nucleic acid binding//heterocyclic compound binding//binding//DNA binding	K09060 plant G-box-binding factor | (RefSeq) G-box-binding factor 1-like	http://www.genome.jp/dbget-bin/www_bget?sot:102583391	--	PREDICTED: G-box-binding factor 1-like isoform X1 [Solanum tuberosum]
42	Novel01708	228.216	535.36	-1.2301	0.00035328	0.0031192	DOWN	--	--	--	--	--	--	--	--	--	hypothetical protein B456_007G053400 [Gossypium raimondii]
43	Novel01753	354.621	729.997	-1.0416	0.0015691	0.01076	DOWN	--	--	--	--	GO:0016763//GO:0016757//GO:0003674//GO:0016740//GO:0003824	transferase activity, transferring pentosyl groups//transferase activity, transferring glycosyl groups//molecular_function//transferase activity//catalytic activity	K00763 nicotinate phosphoribosyltransferase [EC:6.3.4.21] | (RefSeq) nicotinate phosphoribosyltransferase 1-like	http://www.genome.jp/dbget-bin/www_bget?sot:102592075	--	PREDICTED: nicotinate phosphoribosyltransferase-like [Solanum tuberosum]
44	Novel01788	12.8849	558.892	-5.4388	4.0708e-05	0.00049221	DOWN	--	--	--	--	GO:0003674//GO:0005488//GO:0005515	molecular_function//binding//protein binding	no KO assigned | (RefSeq) uncharacterized LOC102600894	http://www.genome.jp/dbget-bin/www_bget?sot:102600894	--	PREDICTED: uncharacterized protein LOC102600894 [Solanum tuberosum]
45	Novel01796	0.691567	19.0611	-4.7846	0.0019904	0.013045	DOWN	--	--	--	--	--	--	--	--	--	--
46	Novel01815	3.31655	71.8113	-4.4365	1.0493e-08	2.9846e-07	DOWN	--	--	--	--	--	--	--	--	--	--
47	Novel01842	810.541	1772.48	-1.1288	0.00031834	0.0028668	DOWN	--	--	GO:0005575//GO:0016020//GO:0044425//GO:0016021//GO:0031224	cellular_component//membrane//membrane part//integral component of membrane//intrinsic component of membrane	GO:0003674//GO:0043167//GO:0008289//GO:0005488//GO:0043168//GO:0005543//GO:0035091	molecular_function//ion binding//lipid binding//binding//anion binding//phospholipid binding//phosphatidylinositol binding	no KO assigned | (RefSeq) uncharacterized LOC102590840	http://www.genome.jp/dbget-bin/www_bget?sot:102590840	--	PREDICTED: uncharacterized protein LOC102590840 [Solanum tuberosum]
48	Novel01854	593.003	1235.96	-1.0595	0.0010216	0.0075533	DOWN	--	--	--	--	GO:0008270//GO:0003674//GO:0043167//GO:0005488//GO:0046872//GO:0046914//GO:0043169	zinc ion binding//molecular_function//ion binding//binding//metal ion binding//transition metal ion binding//cation binding	K17604 zinc finger SWIM domain-containing protein 3 | (RefSeq) protein FAR1-RELATED SEQUENCE 6-like	http://www.genome.jp/dbget-bin/www_bget?sot:102584795	--	PREDICTED: protein FAR1-RELATED SEQUENCE 6-like isoform X1 [Solanum tuberosum]
49	Novel01970	33.7069	91.439	-1.4398	0.0066444	0.034431	DOWN	--	--	--	--	--	--	no KO assigned | (RefSeq) rhomboid-like protein 20	http://www.genome.jp/dbget-bin/www_bget?sot:102578549	--	PREDICTED: ubiquitin-associated domain-containing protein 2-like [Solanum tuberosum]
50	Novel02091	39.959	234.149	-2.5508	5.6468e-07	1.1279e-05	DOWN	--	--	--	--	GO:0003674//GO:0043167//GO:0008270//GO:0046914//GO:0005515//GO:0043169//GO:0046872//GO:0005488	molecular_function//ion binding//zinc ion binding//transition metal ion binding//protein binding//cation binding//metal ion binding//binding	--	--	--	PREDICTED: uncharacterized protein LOC104109306 [Nicotiana tomentosiformis]
51	Novel02142	2512.22	5062.83	-1.011	0.00079002	0.0061	DOWN	--	--	--	--	--	--	no KO assigned | (RefSeq) sporulation protein RMD1	http://www.genome.jp/dbget-bin/www_bget?sot:102578930	--	PREDICTED: uncharacterized protein LOC102578930 [Solanum tuberosum]
52	Novel02149	211.845	469.894	-1.1493	0.0010264	0.0075795	DOWN	--	--	--	--	--	--	K10666 E3 ubiquitin-protein ligase RNF5 [EC:2.3.2.27] | (RefSeq) uncharacterized LOC102579795	http://www.genome.jp/dbget-bin/www_bget?sot:102579795	--	PREDICTED: uncharacterized protein LOC104220585 [Nicotiana sylvestris]
53	Novel02187	726.616	1666.19	-1.1973	0.00013603	0.001396	DOWN	GO:0055114//GO:0009987//GO:0050789//GO:0042221//GO:0008150//GO:0044033//GO:0023052//GO:0019073//GO:0044260//GO:0019068//GO:0071704//GO:0006725//GO:0051276//GO:0008152//GO:0019236//GO:0006996//GO:0022607//GO:0071840//GO:0006807//GO:0046483//GO:0044238//GO:0044764//GO:0090304//GO:0007165//GO:0016043//GO:0034641//GO:0071103//GO:0006259//GO:0065007//GO:1902590//GO:0050896//GO:0044419//GO:0050794//GO:…	oxidation-reduction process//cellular process//regulation of biological process//response to chemical//biological_process//multi-organism metabolic process//signaling//viral DNA genome packaging//cellular macromolecule metabolic process//virion assembly//organic substance metabolic process//cellular aromatic compound metabolic process//chromosome organization//metabolic process//response to phero…	--	--	GO:0016491//GO:0003824//GO:0003674//GO:0016209	oxidoreductase activity//catalytic activity//molecular_function//antioxidant activity	no KO assigned | (RefSeq) uncharacterized LOC102589252	http://www.genome.jp/dbget-bin/www_bget?sot:102589252	--	PREDICTED: uncharacterized protein LOC102589252 [Solanum tuberosum]
54	Novel02355	249.793	1050.41	-2.0722	6.7086e-10	2.3532e-08	DOWN	--	--	--	--	--	--	K00695 sucrose synthase [EC:2.4.1.13] | (RefSeq) sucrose synthase-like	http://www.genome.jp/dbget-bin/www_bget?sot:102586510	--	PREDICTED: sucrose synthase-like [Nicotiana sylvestris]
55	Novel02430	16.3738	64.3079	-1.9736	0.002739	0.016874	DOWN	--	--	--	--	--	--	--	--	--	--
56	Novel02472	9.69358	41.0448	-2.0821	0.007147	0.036465	DOWN	--	--	--	--	--	--	K00975 glucose-1-phosphate adenylyltransferase [EC:2.7.7.27] | (RefSeq) AGPS1; glucose-1-phosphate adenylyltransferase large subunit 1-like	http://www.genome.jp/dbget-bin/www_bget?sot:102591766	--	PREDICTED: glucose-1-phosphate adenylyltransferase large subunit 1-like isoform X1 [Solanum tuberosum]>gi|565399150|ref|XP_006365121.1| PREDICTED: glucose-1-phosphate adenylyltransferase large subunit 1-like isoform X2 [Solanum tuberosum]
57	Novel02494	3.06048	28.0233	-3.1948	0.0030211	0.018283	DOWN	--	--	--	--	--	--	no KO assigned | (RefSeq) uncharacterized LOC102578411	http://www.genome.jp/dbget-bin/www_bget?sot:102578411	--	PREDICTED: uncharacterized protein LOC104217940 isoform X2 [Nicotiana sylvestris]
58	Novel02564	29.3619	86.9055	-1.5655	0.0046932	0.026076	DOWN	--	--	--	--	--	--	no KO assigned | (RefSeq) uncharacterized protein At1g04910-like	http://www.genome.jp/dbget-bin/www_bget?sot:102603700	--	PREDICTED: uncharacterized protein At1g04910-like [Solanum tuberosum]
59	Novel02649	271.106	647.022	-1.255	0.00023769	0.0022359	DOWN	--	--	--	--	--	--	no KO assigned | (RefSeq) uncharacterized LOC102584269	http://www.genome.jp/dbget-bin/www_bget?sot:102584269	--	PREDICTED: uncharacterized protein LOC102584269 [Solanum tuberosum]
60	Novel02765	1477.63	3438.68	-1.2186	5.9705e-05	0.00069132	DOWN	GO:0071496//GO:0009991//GO:0031668//GO:0009987//GO:0051302//GO:0048519//GO:0033554//GO:0009432//GO:0050789//GO:0008150//GO:0007154//GO:0051782//GO:0051716//GO:0006950//GO:0051301//GO:0009605//GO:0050794//GO:0050896//GO:0048523//GO:0065007	cellular response to external stimulus//response to extracellular stimulus//cellular response to extracellular stimulus//cellular process//regulation of cell division//negative regulation of biological process//cellular response to stress//SOS response//regulation of biological process//biological_process//cell communication//negative regulation of cell division//cellular response to stimulus//re…	GO:0005575//GO:0071944//GO:0031975//GO:0009274//GO:0030313//GO:0030312//GO:0009276//GO:0044464//GO:0005618//GO:0005623	cellular_component//cell periphery//envelope//peptidoglycan-based cell wall//cell envelope//external encapsulating structure//Gram-negative-bacterium-type cell wall//cell part//cell wall//cell	--	--	K15731 carboxy-terminal domain RNA polymerase II polypeptide A small phosphatase [EC:3.1.3.16] | (RefSeq) CTD nuclear envelope phosphatase 1 homolog	http://www.genome.jp/dbget-bin/www_bget?sot:102600526	--	PREDICTED: CTD small phosphatase-like protein 2-like [Solanum tuberosum]
61	Novel02784	1285.79	2909.31	-1.178	0.00012292	0.0012835	DOWN	--	--	--	--	--	--	no KO assigned | (RefSeq) putative remorin a4-e8	http://www.genome.jp/dbget-bin/www_bget?sot:102577854	--	PREDICTED: remorin [Solanum tuberosum]
62	Novel02789	86.0219	274.331	-1.6731	2.8215e-05	0.00035817	DOWN	--	--	--	--	--	--	--	--	--	PREDICTED: uncharacterized protein LOC104213819 [Nicotiana sylvestris]
63	Novel02808	6.52285	39.5488	-2.6001	0.0019801	0.012983	DOWN	--	--	--	--	GO:0043169//GO:0046914//GO:0005488//GO:0046872//GO:0003676//GO:1901363//GO:0097159//GO:0008270//GO:0043167//GO:0003674	cation binding//transition metal ion binding//binding//metal ion binding//nucleic acid binding//heterocyclic compound binding//organic cyclic compound binding//zinc ion binding//ion binding//molecular_function	no KO assigned | (RefSeq) uncharacterized LOC102600866	http://www.genome.jp/dbget-bin/www_bget?sot:102600866	--	PREDICTED: uncharacterized protein LOC102600866 [Solanum tuberosum]
64	Novel02839	29.0278	113.503	-1.9672	0.00017078	0.0016975	DOWN	GO:0009987//GO:0050789//GO:0008150//GO:0023052//GO:0035556//GO:0007165//GO:0065007//GO:0050794//GO:0050896//GO:0007154//GO:0051716//GO:0007264	cellular process//regulation of biological process//biological_process//signaling//intracellular signal transduction//signal transduction//biological regulation//regulation of cellular process//response to stimulus//cell communication//cellular response to stimulus//small GTPase mediated signal transduction	--	--	GO:0003674//GO:0098772//GO:0005085	molecular_function//molecular function regulator//guanyl-nucleotide exchange factor activity	--	--	--	PREDICTED: uncharacterized protein LOC102588696 [Solanum tuberosum]
65	Novel02944	45.6632	147.689	-1.6935	0.00028267	0.0025862	DOWN	--	--	--	--	--	--	--	--	--	--
66	Novel02955	341.582	923.66	-1.4351	1.2924e-05	0.00018198	DOWN	--	--	--	--	GO:0003674//GO:0005515//GO:0005488	molecular_function//protein binding//binding	no KO assigned | (RefSeq) F-box/FBD/LRR-repeat protein At1g13570-like	http://www.genome.jp/dbget-bin/www_bget?sot:102591128	--	PREDICTED: F-box/FBD/LRR-repeat protein At1g13570-like isoform X1 [Solanum tuberosum]>gi|565364418|ref|XP_006348921.1| PREDICTED: F-box/FBD/LRR-repeat protein At1g13570-like isoform X2 [Solanum tuberosum]>gi|565364420|ref|XP_006348922.1| PREDICTED: F-box/FBD/LRR-repeat protein At1g13570-like isoform X3 [Solanum tuberosum]>gi|565364422|ref|XP_006348923.1| PREDICTED: F-box/FBD/LRR-repeat protein At…
67	Novel02971	709.917	1510.25	-1.0891	0.00049399	0.004111	DOWN	--	--	--	--	GO:0015079//GO:0005261//GO:0046873//GO:0005215//GO:0022838//GO:0015075//GO:0008324//GO:0022890//GO:0005216//GO:0003674//GO:0015077//GO:0015267//GO:0022803//GO:0005267//GO:0022857	potassium ion transmembrane transporter activity//cation channel activity//metal ion transmembrane transporter activity//transporter activity//substrate-specific channel activity//ion transmembrane transporter activity//cation transmembrane transporter activity//inorganic cation transmembrane transporter activity//ion channel activity//molecular_function//monovalent inorganic cation transmembrane…	--	--	--	--
68	Novel02987	83.6795	179.528	-1.1013	0.010544	0.049171	DOWN	--	--	--	--	--	--	K09191 general transcription factor IIIA | (RefSeq) zinc finger protein 16	http://www.genome.jp/dbget-bin/www_bget?sot:102603483	--	PREDICTED: zinc finger protein 16-like [Solanum tuberosum]
69	Novel03031	2430.99	4982.71	-1.0354	0.00063986	0.0051072	DOWN	GO:0032501//GO:0007600//GO:0003008//GO:0050953//GO:0050877//GO:0008150//GO:0007601	multicellular organismal process//sensory perception//system process//sensory perception of light stimulus//nervous system process//biological_process//visual perception	--	--	GO:0043168//GO:0030553//GO:0005488//GO:1901265//GO:0030551//GO:0097367//GO:0017076//GO:0042578//GO:0000166//GO:0004112//GO:0004114//GO:0032561//GO:0032553//GO:0016787//GO:0032555//GO:0043167//GO:0003674//GO:0036094//GO:0003824//GO:1901363//GO:0019001//GO:0016788//GO:0097159//GO:0008081	anion binding//cGMP binding//binding//nucleoside phosphate binding//cyclic nucleotide binding//carbohydrate derivative binding//purine nucleotide binding//phosphoric ester hydrolase activity//nucleotide binding//cyclic-nucleotide phosphodiesterase activity//3',5'-cyclic-nucleotide phosphodiesterase activity//guanyl ribonucleotide binding//ribonucleotide binding//hydrolase activity//purine ribonuc…	no KO assigned | (RefSeq) uncharacterized LOC102602232	http://www.genome.jp/dbget-bin/www_bget?sot:102602232	--	PREDICTED: uncharacterized protein LOC102602232 isoform X1 [Solanum tuberosum]>gi|565350832|ref|XP_006342366.1| PREDICTED: uncharacterized protein LOC102602232 isoform X2 [Solanum tuberosum]
70	Novel03036	854.452	1792.35	-1.0688	0.00062642	0.0050163	DOWN	GO:0051179//GO:0055085//GO:0009987//GO:0006810//GO:0051234//GO:0008150	localization//transmembrane transport//cellular process//transport//establishment of localization//biological_process	GO:0031224//GO:0016021//GO:0044425//GO:0005575//GO:0016020	intrinsic component of membrane//integral component of membrane//membrane part//cellular_component//membrane	GO:0005215//GO:0022857//GO:0003674	transporter activity//transmembrane transporter activity//molecular_function	no KO assigned | (RefSeq) organic cation/carnitine transporter 7-like	http://www.genome.jp/dbget-bin/www_bget?sot:102582213	--	PREDICTED: organic cation/carnitine transporter 7-like [Solanum tuberosum]
71	Novel03041	656.746	1345.57	-1.0348	0.0011807	0.008508	DOWN	GO:0006313//GO:0043170//GO:0044237//GO:0055085//GO:0006139//GO:1901360//GO:0090304//GO:0046483//GO:0044238//GO:0006310//GO:0006807//GO:0051179//GO:0006259//GO:0034641//GO:0006725//GO:0071704//GO:0044260//GO:0008152//GO:0032196//GO:0009987//GO:0008150//GO:0051234//GO:0006810	transposition, DNA-mediated//macromolecule metabolic process//cellular metabolic process//transmembrane transport//nucleobase-containing compound metabolic process//organic cyclic compound metabolic process//nucleic acid metabolic process//heterocycle metabolic process//primary metabolic process//DNA recombination//nitrogen compound metabolic process//localization//DNA metabolic process//cellular…	--	--	GO:1901265//GO:0046872//GO:0048037//GO:0043168//GO:0005488//GO:0043169//GO:0046914//GO:0003677//GO:0000166//GO:0043167//GO:0036094//GO:0003674//GO:0004803//GO:0016757//GO:0008270//GO:0097159//GO:0050662//GO:0050660//GO:0003824//GO:1901363//GO:0003676//GO:0016740	nucleoside phosphate binding//metal ion binding//cofactor binding//anion binding//binding//cation binding//transition metal ion binding//DNA binding//nucleotide binding//ion binding//small molecule binding//molecular_function//transposase activity//transferase activity, transferring glycosyl groups//zinc ion binding//organic cyclic compound binding//coenzyme binding//flavin adenine dinucleotide b…	no KO assigned | (RefSeq) protein FAR1-RELATED SEQUENCE 2-like	http://www.genome.jp/dbget-bin/www_bget?sot:102598208	--	PREDICTED: protein FAR1-RELATED SEQUENCE 2-like isoform X1 [Solanum tuberosum]>gi|565383113|ref|XP_006357868.1| PREDICTED: protein FAR1-RELATED SEQUENCE 2-like isoform X2 [Solanum tuberosum]
72	Novel03056	140.925	362.976	-1.3649	0.00024069	0.0022584	DOWN	GO:0071704//GO:0006725//GO:1901576//GO:0044260//GO:0008152//GO:0019083//GO:0009987//GO:1901362//GO:0019080//GO:0019438//GO:0044249//GO:0008150//GO:0044033//GO:0043170//GO:0051704//GO:0009059//GO:0044237//GO:0016032//GO:0044403//GO:0044271//GO:0006139//GO:1901360//GO:0044764//GO:0046483//GO:0044238//GO:0090304//GO:0010467//GO:0009058//GO:0006807//GO:0018130//GO:0044419//GO:0019058//GO:0034654//GO:…	organic substance metabolic process//cellular aromatic compound metabolic process//organic substance biosynthetic process//cellular macromolecule metabolic process//metabolic process//viral transcription//cellular process//organic cyclic compound biosynthetic process//viral gene expression//aromatic compound biosynthetic process//cellular biosynthetic process//biological_process//multi-organism m…	--	--	--	--	--	--	--	--
73	Novel03108	406.416	856.868	-1.0761	0.0010799	0.0079077	DOWN	GO:0055085//GO:0051179//GO:0050896//GO:0042493//GO:0006855//GO:0015893//GO:0009987//GO:0008150//GO:0042221//GO:0006810//GO:0051234	transmembrane transport//localization//response to stimulus//response to drug//drug transmembrane transport//drug transport//cellular process//biological_process//response to chemical//transport//establishment of localization	GO:0016020//GO:0005575	membrane//cellular_component	GO:0022804//GO:0005215//GO:0015291//GO:0003674//GO:0015297//GO:0015238//GO:0022857	active transmembrane transporter activity//transporter activity//secondary active transmembrane transporter activity//molecular_function//antiporter activity//drug transmembrane transporter activity//transmembrane transporter activity	--	--	--	--
74	Novel03167	373.523	757.949	-1.0209	0.0021864	0.014088	DOWN	GO:0055114//GO:0009056//GO:0006082//GO:0044281//GO:0044248//GO:0009987//GO:1901564//GO:0008150//GO:0006544//GO:0006520//GO:0071704//GO:1901605//GO:0006546//GO:1901606//GO:0008152//GO:1901565//GO:0046395//GO:1901575//GO:0006807//GO:0043436//GO:0044238//GO:0044282//GO:0009071//GO:0009069//GO:0019752//GO:0016054//GO:0009063//GO:0044237	oxidation-reduction process//catabolic process//organic acid metabolic process//small molecule metabolic process//cellular catabolic process//cellular process//organonitrogen compound metabolic process//biological_process//glycine metabolic process//cellular amino acid metabolic process//organic substance metabolic process//alpha-amino acid metabolic process//glycine catabolic process//alpha-amin…	--	--	GO:0097159//GO:0016638//GO:0016491//GO:0003824//GO:1901363//GO:0003674//GO:0016642//GO:0043167//GO:0030170//GO:0048037//GO:0004375//GO:0005488//GO:0043168	organic cyclic compound binding//oxidoreductase activity, acting on the CH-NH2 group of donors//oxidoreductase activity//catalytic activity//heterocyclic compound binding//molecular_function//oxidoreductase activity, acting on the CH-NH2 group of donors, disulfide as acceptor//ion binding//pyridoxal phosphate binding//cofactor binding//glycine dehydrogenase (decarboxylating) activity//binding//an…	K01760 cystathionine beta-lyase [EC:4.4.1.8] | (RefSeq) CBL; cystathionine beta-lyase	http://www.genome.jp/dbget-bin/www_bget?sot:102577774	--	PREDICTED: uncharacterized protein LOC101251113 isoform X1 [Solanum lycopersicum]>gi|723722669|ref|XP_010325087.1| PREDICTED: uncharacterized protein LOC101251113 isoform X1 [Solanum lycopersicum]
75	Novel03179	148.626	406.66	-1.4521	5.9208e-05	0.0006869	DOWN	--	--	GO:0005737//GO:0005575//GO:0044424//GO:0005623//GO:0044464//GO:0005622	cytoplasm//cellular_component//intracellular part//cell//cell part//intracellular	GO:0003674//GO:0098772//GO:0005085//GO:0005089//GO:0005488//GO:0005088//GO:0019825	molecular_function//molecular function regulator//guanyl-nucleotide exchange factor activity//Rho guanyl-nucleotide exchange factor activity//binding//Ras guanyl-nucleotide exchange factor activity//oxygen binding	no KO assigned | (RefSeq) two-on-two hemoglobin-3-like	http://www.genome.jp/dbget-bin/www_bget?sot:102587743	--	PREDICTED: uncharacterized protein LOC102587743 [Solanum tuberosum]
76	Novel03233	428.553	869.652	-1.021	0.0017415	0.011689	DOWN	--	--	--	--	--	--	no KO assigned | (RefSeq) histidine triad nucleotide-binding protein 3	http://www.genome.jp/dbget-bin/www_bget?sot:102601535	--	PREDICTED: histidine triad nucleotide-binding protein 3-like [Solanum tuberosum]
77	Novel03313	161.956	330.524	-1.0291	0.0051023	0.027937	DOWN	--	--	--	--	--	--	--	--	--	--
78	Novel03369	261.078	609.586	-1.2233	0.00036837	0.0032232	DOWN	GO:0044237//GO:0022402//GO:0009893//GO:0051301//GO:0009894//GO:0000910//GO:0019222//GO:0010506//GO:0048518//GO:0050794//GO:0044085//GO:0010508//GO:0043093//GO:0000003//GO:0065007//GO:0007049//GO:0019954//GO:0016043//GO:0071840//GO:0022607//GO:0032506//GO:0090529//GO:0061640//GO:0000281//GO:0008152//GO:0000917//GO:1902410//GO:0031325//GO:0031331//GO:0032505//GO:0048522//GO:1903047//GO:0009896//GO:…	cellular metabolic process//cell cycle process//positive regulation of metabolic process//cell division//regulation of catabolic process//cytokinesis//regulation of metabolic process//regulation of autophagy//positive regulation of biological process//regulation of cellular process//cellular component biogenesis//positive regulation of autophagy//FtsZ-dependent cytokinesis//reproduction//biologic…	GO:0044424//GO:0044425//GO:0005623//GO:0044464//GO:0005622//GO:0005737//GO:0016020//GO:0005575//GO:0019898	intracellular part//membrane part//cell//cell part//intracellular//cytoplasm//membrane//cellular_component//extrinsic component of membrane	GO:0005488//GO:0005515//GO:0008092//GO:0003674	binding//protein binding//cytoskeletal protein binding//molecular_function	no KO assigned | (RefSeq) uncharacterized LOC102602914	http://www.genome.jp/dbget-bin/www_bget?sot:102602914	--	PREDICTED: uncharacterized protein LOC102602914 [Solanum tuberosum]
79	Novel03403	672.728	1595.02	-1.2455	7.1591e-05	0.00080698	DOWN	--	--	--	--	GO:0005488//GO:0051540//GO:0051536//GO:0003674//GO:0003824	binding//metal cluster binding//iron-sulfur cluster binding//molecular_function//catalytic activity	no KO assigned | (RefSeq) pentatricopeptide repeat-containing protein At5g02830, chloroplastic	http://www.genome.jp/dbget-bin/www_bget?sot:102578424	--	PREDICTED: pentatricopeptide repeat-containing protein At5g02830, chloroplastic-like [Solanum tuberosum]
80	Novel03452	38.5442	187.808	-2.2847	0.010725	0.049796	DOWN	--	--	--	--	--	--	--	--	--	--
81	Novel03517	56.0834	187.753	-1.7432	0.0017662	0.011828	DOWN	--	--	--	--	--	--	no KO assigned | (RefSeq) auxin-induced protein PCNT115-like	http://www.genome.jp/dbget-bin/www_bget?sot:102604231	--	PREDICTED: auxin-induced protein PCNT115-like isoform X1 [Solanum tuberosum]
82	Novel03549	2249.13	5261.37	-1.2261	0.00025112	0.0023436	DOWN	--	--	GO:0044424//GO:0043229//GO:0044444//GO:0005623//GO:0044464//GO:0005622//GO:0009507//GO:0005737//GO:0043227//GO:0043231//GO:0005575//GO:0009536//GO:0043226	intracellular part//intracellular organelle//cytoplasmic part//cell//cell part//intracellular//chloroplast//cytoplasm//membrane-bounded organelle//intracellular membrane-bounded organelle//cellular_component//plastid//organelle	GO:0019787//GO:0005488//GO:0005515//GO:0004842//GO:0016853//GO:0003674//GO:0003824//GO:0016740	ubiquitin-like protein transferase activity//binding//protein binding//ubiquitin-protein transferase activity//isomerase activity//molecular_function//catalytic activity//transferase activity	K10590 E3 ubiquitin-protein ligase TRIP12 [EC:2.3.2.26] | (RefSeq) E3 ubiquitin-protein ligase UPL4	http://www.genome.jp/dbget-bin/www_bget?sot:102581024	--	PREDICTED: E3 ubiquitin-protein ligase UPL4-like [Solanum tuberosum]
83	Novel03593	63.3569	299.462	-2.2408	3.7548e-08	9.5903e-07	DOWN	--	--	--	--	--	--	K16302 metal transporter CNNM | (RefSeq) putative DUF21 domain-containing protein At1g03270	http://www.genome.jp/dbget-bin/www_bget?sot:102580209	--	PREDICTED: putative DUF21 domain-containing protein At1g03270-like [Solanum tuberosum]
84	Novel03608	181.628	387.101	-1.0917	0.002722	0.0168	DOWN	GO:0034968//GO:0016043//GO:0090304//GO:0036211//GO:0044238//GO:0006325//GO:0046483//GO:0019538//GO:0006807//GO:0071840//GO:0006996//GO:0044267//GO:0043933//GO:0016570//GO:0016070//GO:0034641//GO:0018022//GO:0043170//GO:0043414//GO:0006464//GO:0018193//GO:0043631//GO:0032259//GO:0006479//GO:0044237//GO:0008213//GO:0016571//GO:0006139//GO:1901360//GO:0009987//GO:0016569//GO:0043412//GO:0008150//GO:…	histone lysine methylation//cellular component organization//nucleic acid metabolic process//protein modification process//primary metabolic process//chromatin organization//heterocycle metabolic process//protein metabolic process//nitrogen compound metabolic process//cellular component organization or biogenesis//organelle organization//cellular protein metabolic process//protein-containing comp…	GO:0044464//GO:0005634//GO:0005622//GO:0005623//GO:0043229//GO:0044424//GO:0043226//GO:0043227//GO:0043231//GO:0005575	cell part//nucleus//intracellular//cell//intracellular organelle//intracellular part//organelle//membrane-bounded organelle//intracellular membrane-bounded organelle//cellular_component	GO:0043169//GO:0046914//GO:0005515//GO:0008757//GO:0016772//GO:0046872//GO:0070566//GO:0008276//GO:0004652//GO:0042054//GO:0016278//GO:0005488//GO:0003824//GO:0016740//GO:0018024//GO:0043167//GO:0008170//GO:0016279//GO:0016779//GO:0003674//GO:0008168//GO:0016741//GO:0008270	cation binding//transition metal ion binding//protein binding//S-adenosylmethionine-dependent methyltransferase activity//transferase activity, transferring phosphorus-containing groups//metal ion binding//adenylyltransferase activity//protein methyltransferase activity//polynucleotide adenylyltransferase activity//histone methyltransferase activity//lysine N-methyltransferase activity//binding//…	no KO assigned | (RefSeq) histone-lysine N-methyltransferase SUVR2	http://www.genome.jp/dbget-bin/www_bget?sot:102580002	--	PREDICTED: histone-lysine N-methyltransferase SUVR2-like [Solanum tuberosum]
85	Novel03622	141.487	682.449	-2.2701	1.443e-10	5.6457e-09	DOWN	GO:0008152//GO:0006508//GO:0071704//GO:0008150//GO:0043170//GO:0044238//GO:0019538	metabolic process//proteolysis//organic substance metabolic process//biological_process//macromolecule metabolic process//primary metabolic process//protein metabolic process	--	--	GO:0016787//GO:0008236//GO:0003674//GO:0003824//GO:0017171//GO:0070011//GO:0005488//GO:0008233//GO:0046983//GO:0005515	hydrolase activity//serine-type peptidase activity//molecular_function//catalytic activity//serine hydrolase activity//peptidase activity, acting on L-amino acid peptides//binding//peptidase activity//protein dimerization activity//protein binding	no KO assigned | (RefSeq) acylamino-acid-releasing enzyme-like	http://www.genome.jp/dbget-bin/www_bget?sot:102586352	--	PREDICTED: acylamino-acid-releasing enzyme-like isoform X1 [Solanum tuberosum]>gi|565392998|ref|XP_006362172.1| PREDICTED: acylamino-acid-releasing enzyme-like isoform X2 [Solanum tuberosum]
86	Novel03627	135.271	292.48	-1.1125	0.0029067	0.017681	DOWN	--	--	--	--	--	--	no KO assigned | (RefSeq) deacetoxyvindoline 4-hydroxylase-like	http://www.genome.jp/dbget-bin/www_bget?sot:102595909	--	PREDICTED: deacetoxyvindoline 4-hydroxylase-like [Solanum tuberosum]
87	PGSC0003DMG400000063	1345.37	2724.44	-1.018	0.00084512	0.0064601	DOWN	GO:0008150//GO:0006812//GO:0051234//GO:0006810//GO:0006811//GO:0030001//GO:0051179	biological_process//cation transport//establishment of localization//transport//ion transport//metal ion transport//localization	--	--	GO:0005488//GO:0003674//GO:0043167//GO:0046872//GO:0043169	binding//molecular_function//ion binding//metal ion binding//cation binding	no KO assigned | (RefSeq) pollen-specific leucine-rich repeat extensin-like protein 1	http://www.genome.jp/dbget-bin/www_bget?sot:102584008	-	Heavy metal-associated domain, HMA
88	PGSC0003DMG400000149	803.651	1846.45	-1.2001	0.00010617	0.0011296	DOWN	GO:0055114//GO:0008150//GO:0008152	oxidation-reduction process//biological_process//metabolic process	GO:0005575//GO:0016021//GO:0031224//GO:0016020//GO:0044425	cellular_component//integral component of membrane//intrinsic component of membrane//membrane//membrane part	GO:0003674//GO:0046914//GO:0043167//GO:0097159//GO:0043169//GO:0046872//GO:0004497//GO:0016705//GO:0016491//GO:0005506//GO:0005488//GO:0003824//GO:1901363//GO:0020037//GO:0046906	molecular_function//transition metal ion binding//ion binding//organic cyclic compound binding//cation binding//metal ion binding//monooxygenase activity//oxidoreductase activity, acting on paired donors, with incorporation or reduction of molecular oxygen//oxidoreductase activity//iron ion binding//binding//catalytic activity//heterocyclic compound binding//heme binding//tetrapyrrole binding	no KO assigned | (RefSeq) cytochrome P450 704C1-like	http://www.genome.jp/dbget-bin/www_bget?sot:102578583	-	Cytochrome P450||Cytochrome P450, conserved site||Cytochrome P450, E-class, group I
89	PGSC0003DMG400000215	3100.19	6746.6	-1.1218	0.00014041	0.001435	DOWN	--	--	--	--	--	--	K14496 abscisic acid receptor PYR/PYL family | (RefSeq) PYL8; abscisic acid receptor PYL8-like	http://www.genome.jp/dbget-bin/www_bget?sot:102604335	-	Polyketide cyclase/dehydrase||START-like domain
90	PGSC0003DMG400000315	495.998	2361.65	-2.2514	4.7817e-12	2.4177e-10	DOWN	--	--	--	--	--	--	--	--	--	--
91	PGSC0003DMG400000323	396.405	898.877	-1.1811	0.00029848	0.0027043	DOWN	GO:2001141//GO:1901576//GO:0044260//GO:0019219//GO:0009059//GO:0043170//GO:0034645//GO:0006351//GO:0071704//GO:0097659//GO:0019222//GO:0006725//GO:0006139//GO:1901360//GO:1903506//GO:0044271//GO:0044237//GO:0051252//GO:0008152//GO:0010467//GO:0006807//GO:0009058//GO:0009987//GO:0051171//GO:0044238//GO:0046483//GO:0090304//GO:0080090//GO:1901362//GO:0006366//GO:0009889//GO:0034641//GO:0016070//GO:…	regulation of RNA biosynthetic process//organic substance biosynthetic process//cellular macromolecule metabolic process//regulation of nucleobase-containing compound metabolic process//macromolecule biosynthetic process//macromolecule metabolic process//cellular macromolecule biosynthetic process//transcription, DNA-templated//organic substance metabolic process//nucleic acid-templated transcrip…	GO:0070013//GO:0044422//GO:0044446//GO:0043229//GO:0005654//GO:0005575//GO:0043231//GO:0032991//GO:0044428//GO:0043227//GO:0043233//GO:0016592//GO:0044451//GO:0044424//GO:0031981//GO:0031974//GO:0005622//GO:0005634//GO:0044464//GO:0043226//GO:0005623	intracellular organelle lumen//organelle part//intracellular organelle part//intracellular organelle//nucleoplasm//cellular_component//intracellular membrane-bounded organelle//protein-containing complex//nuclear part//membrane-bounded organelle//organelle lumen//mediator complex//nucleoplasm part//intracellular part//nuclear lumen//membrane-enclosed lumen//intracellular//nucleus//cell part//orga…	GO:0003674//GO:0003712//GO:0000988//GO:0000989//GO:0001076	molecular_function//transcription coregulator activity//transcription factor activity, protein binding//transcription factor activity, transcription factor binding//transcription factor activity, RNA polymerase II transcription factor binding	K13528 mediator of RNA polymerase II transcription subunit 20 | (RefSeq) mediator of RNA polymerase II transcription subunit 20a-like	http://www.genome.jp/dbget-bin/www_bget?sot:102597436	-	Mediator complex, subunit Med20
92	PGSC0003DMG400000327	62.6719	263.047	-2.0694	0.0090476	0.043706	DOWN	GO:0015979//GO:0008152//GO:0044237//GO:0008150//GO:0009987	photosynthesis//metabolic process//cellular metabolic process//biological_process//cellular process	GO:0044425//GO:0044424//GO:0016020//GO:0032991//GO:0005575//GO:0016021//GO:0044436//GO:0005623//GO:0009521//GO:0009523//GO:0098796//GO:0031224//GO:0044464//GO:0034357//GO:0005622//GO:0009579	membrane part//intracellular part//membrane//protein-containing complex//cellular_component//integral component of membrane//thylakoid part//cell//photosystem//photosystem II//membrane protein complex//intrinsic component of membrane//cell part//photosynthetic membrane//intracellular//thylakoid	--	--	no KO assigned | (RefSeq) uncharacterized LOC102595674	http://www.genome.jp/dbget-bin/www_bget?sot:102595674	-	Photosystem II PsbX
93	PGSC0003DMG400000331	25.5968	118.344	-2.209	3.426e-05	0.00042319	DOWN	GO:0036211//GO:0044238//GO:0006468//GO:0009987//GO:0006796//GO:0019538//GO:0043412//GO:0044267//GO:0008150//GO:0071704//GO:0043170//GO:0016310//GO:0044260//GO:0006464//GO:0044237//GO:0008152//GO:0006793	protein modification process//primary metabolic process//protein phosphorylation//cellular process//phosphate-containing compound metabolic process//protein metabolic process//macromolecule modification//cellular protein metabolic process//biological_process//organic substance metabolic process//macromolecule metabolic process//phosphorylation//cellular macromolecule metabolic process//cellular p…	--	--	GO:0004674//GO:0097159//GO:0016773//GO:1901363//GO:0000166//GO:0001883//GO:0030554//GO:0003824//GO:0004672//GO:0016740//GO:0016772//GO:0001882//GO:0097367//GO:1901265//GO:0043167//GO:0017076//GO:0036094//GO:0003674//GO:0016301//GO:0005524//GO:0043168//GO:0032553//GO:0032555//GO:0005488//GO:0035639//GO:0032550//GO:0032559//GO:0032549	protein serine/threonine kinase activity//organic cyclic compound binding//phosphotransferase activity, alcohol group as acceptor//heterocyclic compound binding//nucleotide binding//purine nucleoside binding//adenyl nucleotide binding//catalytic activity//protein kinase activity//transferase activity//transferase activity, transferring phosphorus-containing groups//nucleoside binding//carbohydrat…	K08790 serine/threonine kinase 38 [EC:2.7.11.1] | (RefSeq) serine/threonine-protein kinase 38-like	http://www.genome.jp/dbget-bin/www_bget?sot:102593266	-	Serine/threonine-protein kinase, active site||Protein kinase domain||Protein kinase, ATP binding site||AGC-kinase, C-terminal||Protein kinase-like domain
94	PGSC0003DMG400000371	157.618	453.999	-1.5263	2.6021e-05	0.00033373	DOWN	--	--	--	--	--	--	no KO assigned | (RefSeq) putative B3 domain-containing protein At4g03170	http://www.genome.jp/dbget-bin/www_bget?sot:102601063	-	DNA-binding pseudobarrel domain
95	PGSC0003DMG400000383	1331.32	3124.36	-1.2307	4.7475e-05	0.00056577	DOWN	GO:0008152//GO:0031163//GO:0044085//GO:0008150//GO:0016043//GO:0009987//GO:0009058//GO:0016226//GO:0022607//GO:0071840	metabolic process//metallo-sulfur cluster assembly//cellular component biogenesis//biological_process//cellular component organization//cellular process//biosynthetic process//iron-sulfur cluster assembly//cellular component assembly//cellular component organization or biogenesis	GO:0005737//GO:0009507//GO:0044424//GO:0044435//GO:0043227//GO:0005575//GO:0043231//GO:0044422//GO:0043229//GO:0044446//GO:0005623//GO:0044444//GO:0009536//GO:0044434//GO:0009570//GO:0009532//GO:0044464//GO:0043226//GO:0005622	cytoplasm//chloroplast//intracellular part//plastid part//membrane-bounded organelle//cellular_component//intracellular membrane-bounded organelle//organelle part//intracellular organelle//intracellular organelle part//cell//cytoplasmic part//plastid//chloroplast part//chloroplast stroma//plastid stroma//cell part//organelle//intracellular	GO:0032553//GO:0005524//GO:0043168//GO:0032559//GO:0032549//GO:0032550//GO:0035639//GO:0032555//GO:0005488//GO:0043167//GO:1901265//GO:0051540//GO:0097367//GO:0003674//GO:0036094//GO:0017076//GO:0030554//GO:0001883//GO:0000166//GO:1901363//GO:0001882//GO:0097159//GO:0051536	ribonucleotide binding//ATP binding//anion binding//adenyl ribonucleotide binding//ribonucleoside binding//purine ribonucleoside binding//purine ribonucleoside triphosphate binding//purine ribonucleotide binding//binding//ion binding//nucleoside phosphate binding//metal cluster binding//carbohydrate derivative binding//molecular_function//small molecule binding//purine nucleotide binding//adenyl …	no KO assigned | (RefSeq) fe-S cluster assembly factor HCF101, chloroplastic	http://www.genome.jp/dbget-bin/www_bget?sot:102590013	HCF101	P-loop containing nucleoside triphosphate hydrolase||Fe-S cluster assembly domain||Mrp, conserved site||Domain of unknown function DUF971||Mrp/NBP35 ATP-binding protein||MIP18 family-like||Flagellum site-determining protein YlxH/ Fe-S cluster assembling factor NBP35
96	PGSC0003DMG400000422	280.753	1119.61	-1.9956	1.9604e-09	6.3047e-08	DOWN	GO:0071704//GO:0043170//GO:0008152//GO:0006508//GO:0044238//GO:0019538//GO:0008150	organic substance metabolic process//macromolecule metabolic process//metabolic process//proteolysis//primary metabolic process//protein metabolic process//biological_process	--	--	GO:0004185//GO:0008236//GO:0008233//GO:0003674//GO:0016787//GO:0070011//GO:0004180//GO:0070008//GO:0008238//GO:0003824//GO:0017171	serine-type carboxypeptidase activity//serine-type peptidase activity//peptidase activity//molecular_function//hydrolase activity//peptidase activity, acting on L-amino acid peptides//carboxypeptidase activity//serine-type exopeptidase activity//exopeptidase activity//catalytic activity//serine hydrolase activity	K09646 serine carboxypeptidase 1 [EC:3.4.16.-] | (RefSeq) serine carboxypeptidase-like 51	http://www.genome.jp/dbget-bin/www_bget?sot:102606313	SCPL51	Peptidase S10, serine carboxypeptidase||Serine carboxypeptidase, serine active site||Alpha/Beta hydrolase fold
97	PGSC0003DMG400000460	75.7459	216.796	-1.5171	0.00033001	0.0029566	DOWN	--	--	--	--	GO:0008270//GO:0005488//GO:0003674//GO:0043167//GO:0046872//GO:0046914//GO:0043169	zinc ion binding//binding//molecular_function//ion binding//metal ion binding//transition metal ion binding//cation binding	no KO assigned | (RefSeq) RING-H2 finger protein ATL57	http://www.genome.jp/dbget-bin/www_bget?sot:102582195	-	Zinc finger, RING/FYVE/PHD-type||Zinc finger, RING-CH-type||Zinc finger, RING-type
98	PGSC0003DMG400000480	218.138	779.905	-1.8381	6.234e-08	1.5331e-06	DOWN	--	--	GO:0031966//GO:0044425//GO:0005737//GO:0044424//GO:0043231//GO:0005575//GO:0043229//GO:0044446//GO:0044422//GO:0016021//GO:0031090//GO:0043227//GO:0016020//GO:0044429//GO:0005739//GO:0070469//GO:0005743//GO:0031967//GO:0019866//GO:0005623//GO:0044444//GO:0005622//GO:0005740//GO:0031975//GO:0031224//GO:0005746//GO:0043226//GO:0044455//GO:0044464	mitochondrial membrane//membrane part//cytoplasm//intracellular part//intracellular membrane-bounded organelle//cellular_component//intracellular organelle//intracellular organelle part//organelle part//integral component of membrane//organelle membrane//membrane-bounded organelle//membrane//mitochondrial part//mitochondrion//respiratory chain//mitochondrial inner membrane//organelle envelope//or…	--	--	no KO assigned | (RefSeq) cytochrome c oxidase subunit 5C-like	http://www.genome.jp/dbget-bin/www_bget?sot:102599311	-	Cytochrome c oxidase subunit 5c
99	PGSC0003DMG400000501	1786.06	5231.96	-1.5506	0.00028554	0.0026071	DOWN	GO:0009987//GO:0098655//GO:0051179//GO:0071805//GO:0030001//GO:0015672//GO:0051234//GO:0098662//GO:0006810//GO:0008150//GO:0006813//GO:0098660//GO:0034220//GO:0006811//GO:0071804//GO:0055085//GO:0006812	cellular process//cation transmembrane transport//localization//potassium ion transmembrane transport//metal ion transport//monovalent inorganic cation transport//establishment of localization//inorganic cation transmembrane transport//transport//biological_process//potassium ion transport//inorganic ion transmembrane transport//ion transmembrane transport//ion transport//cellular potassium ion t…	GO:0031224//GO:0016020//GO:0016021//GO:0005575//GO:0044425	intrinsic component of membrane//membrane//integral component of membrane//cellular_component//membrane part	GO:0005215//GO:0046873//GO:0008324//GO:0015075//GO:0022890//GO:0022857//GO:0015077//GO:0003674//GO:0015079	transporter activity//metal ion transmembrane transporter activity//cation transmembrane transporter activity//ion transmembrane transporter activity//inorganic cation transmembrane transporter activity//transmembrane transporter activity//monovalent inorganic cation transmembrane transporter activity//molecular_function//potassium ion transmembrane transporter activity	K03549 KUP system potassium uptake protein | (RefSeq) potassium transporter 8-like	http://www.genome.jp/dbget-bin/www_bget?sot:102586526	-	Potassium transporter
100	PGSC0003DMG400000541	16345.9	39836.3	-1.2852	1.7099e-05	0.00023242	DOWN	--	--	--	--	--	--	no KO assigned | (RefSeq) uncharacterized LOC102601715	http://www.genome.jp/dbget-bin/www_bget?sot:102601715	--	--
101	PGSC0003DMG400000542	363.975	887.343	-1.2857	9.896e-05	0.0010639	DOWN	--	--	--	--	--	--	K17964 leucine-rich PPR motif-containing protein, mitochondrial | (RefSeq) pentatricopeptide repeat-containing protein At3g18110, chloroplastic	http://www.genome.jp/dbget-bin/www_bget?sot:102601031	--	--
102	PGSC0003DMG400000545	718.148	2773.54	-1.9494	0.0051183	0.027994	DOWN	--	--	--	--	--	--	no KO assigned | (RefSeq) uncharacterized LOC102598720	http://www.genome.jp/dbget-bin/www_bget?sot:102598720	--	--
103	PGSC0003DMG400000551	304.02	624.944	-1.0396	0.0020517	0.013373	DOWN	--	--	GO:0031224//GO:0016021//GO:0005575//GO:0016020//GO:0044425	intrinsic component of membrane//integral component of membrane//cellular_component//membrane//membrane part	--	--	no KO assigned | (RefSeq) UNC93-like protein 1	http://www.genome.jp/dbget-bin/www_bget?sot:102595991	-	Major facilitator superfamily domain||Ion channel regulatory protein, UNC-93
104	PGSC0003DMG400000643	248.204	571.726	-1.2038	0.00039909	0.003445	DOWN	--	--	GO:0044424//GO:0005737//GO:0009507//GO:0044425//GO:0016021//GO:0043229//GO:0005575//GO:0043231//GO:0016020//GO:0043227//GO:0009536//GO:0044444//GO:0005623//GO:0005622//GO:0044464//GO:0043226//GO:0031224	intracellular part//cytoplasm//chloroplast//membrane part//integral component of membrane//intracellular organelle//cellular_component//intracellular membrane-bounded organelle//membrane//membrane-bounded organelle//plastid//cytoplasmic part//cell//intracellular//cell part//organelle//intrinsic component of membrane	--	--	no KO assigned | (RefSeq) uncharacterized LOC102604155	http://www.genome.jp/dbget-bin/www_bget?sot:102604155	--	--
105	PGSC0003DMG400000783	13224.7	27221.8	-1.0415	0.000339	0.0030137	DOWN	GO:0071669//GO:0071840//GO:0045229//GO:0071555//GO:0009664//GO:0009987//GO:0016043//GO:0071554//GO:0008150	plant-type cell wall organization or biogenesis//cellular component organization or biogenesis//external encapsulating structure organization//cell wall organization//plant-type cell wall organization//cellular process//cellular component organization//cell wall organization or biogenesis//biological_process	--	--	GO:0003674//GO:0005199//GO:0005198	molecular_function//structural constituent of cell wall//structural molecule activity	--	--	-	Extensin domain
106	PGSC0003DMG400000834	189.561	422.501	-1.1563	0.0010948	0.0079871	DOWN	--	--	--	--	--	--	no KO assigned | (RefSeq) uncharacterized LOC102601614	http://www.genome.jp/dbget-bin/www_bget?sot:102601614	--	--
107	PGSC0003DMG400000885	2324.61	6358.84	-1.4518	1.8588e-06	3.2505e-05	DOWN	--	--	GO:0031461//GO:0032991//GO:0000151//GO:0005575//GO:1902494//GO:0044424//GO:1990234//GO:0044464//GO:0005622//GO:0031463//GO:0005623	cullin-RING ubiquitin ligase complex//protein-containing complex//ubiquitin ligase complex//cellular_component//catalytic complex//intracellular part//transferase complex//cell part//intracellular//Cul3-RING ubiquitin ligase complex//cell	--	--	K10523 speckle-type POZ protein | (RefSeq) BTB/POZ domain-containing protein At1g21780	http://www.genome.jp/dbget-bin/www_bget?sot:102594789	-	BTB/POZ domain||SKP1/BTB/POZ domain
108	PGSC0003DMG400000919	14078.6	45708.4	-1.699	1.4911e-08	4.1194e-07	DOWN	GO:0055085//GO:0051234//GO:0006810//GO:0008150//GO:0009987//GO:0051179	transmembrane transport//establishment of localization//transport//biological_process//cellular process//localization	GO:0044425//GO:0016020//GO:0005575//GO:0016021//GO:0031224	membrane part//membrane//cellular_component//integral component of membrane//intrinsic component of membrane	GO:0003674//GO:0022857//GO:0005215	molecular_function//transmembrane transporter activity//transporter activity	no KO assigned | (RefSeq) WAT1-related protein At4g08300-like	http://www.genome.jp/dbget-bin/www_bget?sot:102592022	-	WAT1-related protein||EamA domain
109	PGSC0003DMG400000926	7306.85	24090.7	-1.7212	8.8245e-09	2.5318e-07	DOWN	GO:0008152//GO:0015979//GO:0044237//GO:0008150//GO:0009987	metabolic process//photosynthesis//cellular metabolic process//biological_process//cellular process	GO:0005737//GO:1902494//GO:0044425//GO:0009507//GO:0044424//GO:0055035//GO:0009654//GO:0042651//GO:0044435//GO:0031984//GO:0009535//GO:0043227//GO:0016020//GO:0032991//GO:0005575//GO:0043231//GO:0044422//GO:0043229//GO:0044446//GO:0005623//GO:0044444//GO:0044436//GO:0009534//GO:0009521//GO:0009536//GO:0044434//GO:0098796//GO:0009523//GO:0031976//GO:0044464//GO:0043226//GO:0019898//GO:1990204//GO:…	cytoplasm//catalytic complex//membrane part//chloroplast//intracellular part//plastid thylakoid membrane//photosystem II oxygen evolving complex//thylakoid membrane//plastid part//organelle subcompartment//chloroplast thylakoid membrane//membrane-bounded organelle//membrane//protein-containing complex//cellular_component//intracellular membrane-bounded organelle//organelle part//intracellular org…	GO:0005509//GO:0005488//GO:0043167//GO:0046872//GO:0003674//GO:0043169	calcium ion binding//binding//ion binding//metal ion binding//molecular_function//cation binding	K02717 photosystem II oxygen-evolving enhancer protein 2 | (RefSeq) OEE2, psbP; oxygen-evolving enhancer protein 2, chloroplastic-like	http://www.genome.jp/dbget-bin/www_bget?sot:102603839	-	Mog1/PsbP, alpha/beta/alpha sandwich||PsbP family
110	PGSC0003DMG400000981	37.655	125.867	-1.741	0.0086019	0.042134	DOWN	--	--	--	--	--	--	no KO assigned | (RefSeq) uncharacterized protein At2g23090-like	http://www.genome.jp/dbget-bin/www_bget?sot:102603581	-	Uncharacterised protein family SERF||At2g23090-like
111	PGSC0003DMG400001014	7.10843	37.8843	-2.414	0.0043729	0.024637	DOWN	GO:0098655//GO:0009167//GO:1901293//GO:0009145//GO:0046390//GO:0009205//GO:0044281//GO:1901362//GO:0009987//GO:0044238//GO:0009152//GO:0046483//GO:0042451//GO:0006754//GO:0006807//GO:0009150//GO:0019637//GO:0009260//GO:0009058//GO:0009163//GO:0009124//GO:0009142//GO:0051179//GO:0006796//GO:0019438//GO:0034654//GO:0015986//GO:0009201//GO:0009126//GO:0006163//GO:0009116//GO:0072521//GO:0009119//GO:…	cation transmembrane transport//purine ribonucleoside monophosphate metabolic process//nucleoside phosphate biosynthetic process//purine nucleoside triphosphate biosynthetic process//ribose phosphate biosynthetic process//purine ribonucleoside triphosphate metabolic process//small molecule metabolic process//organic cyclic compound biosynthetic process//cellular process//primary metabolic process…	GO:0044464//GO:0005622//GO:0005623//GO:0045261//GO:0098796//GO:0016020//GO:0032991//GO:0005575//GO:0016469//GO:0044425//GO:0044424//GO:0045259//GO:0033178	cell part//intracellular//cell//proton-transporting ATP synthase complex, catalytic core F(1)//membrane protein complex//membrane//protein-containing complex//cellular_component//proton-transporting two-sector ATPase complex//membrane part//intracellular part//proton-transporting ATP synthase complex//proton-transporting two-sector ATPase complex, catalytic domain	GO:0097159//GO:0016462//GO:0042625//GO:0043492//GO:0017111//GO:0044769//GO:0005215//GO:0022804//GO:0042626//GO:0003824//GO:0015075//GO:0030554//GO:0001883//GO:0016887//GO:0000166//GO:1901363//GO:0008324//GO:0046933//GO:0001882//GO:0022857//GO:0022890//GO:0019829//GO:1901265//GO:0015078//GO:0043167//GO:0097367//GO:0003674//GO:0036094//GO:0016818//GO:0015399//GO:0015077//GO:0017076//GO:0032553//GO:…	organic cyclic compound binding//pyrophosphatase activity//ATPase coupled ion transmembrane transporter activity//ATPase activity, coupled to movement of substances//nucleoside-triphosphatase activity//ATPase activity, coupled to transmembrane movement of ions, rotational mechanism//transporter activity//active transmembrane transporter activity//ATPase activity, coupled to transmembrane movement…	K02112 F-type H+-transporting ATPase subunit beta [EC:3.6.3.14] | (RefSeq) atpB, SotuCp028; ATP synthase CF1 beta subunit	http://www.genome.jp/dbget-bin/www_bget?sot:4099984	ATPB	ATP synthase, F1 complex, delta/epsilon subunit, N-terminal||P-loop containing nucleoside triphosphate hydrolase||ATP synthase, F1 complex, beta subunit||ATPase, alpha/beta subunit, nucleotide-binding domain, active site||ATP synthase, F1 complex, delta/epsilon subunit||ATPase, F1/V1/A1 complex, alpha/beta subunit, nucleotide-binding domain||ATPase, F1/V1 complex, beta/alpha subunit, C-terminal
112	PGSC0003DMG400001127	515.091	1200.9	-1.2212	0.00050531	0.004186	DOWN	GO:0006323//GO:0051276//GO:0006333//GO:0034622//GO:0071824//GO:0065004//GO:0070271//GO:0006334//GO:0044085//GO:0043933//GO:0008150//GO:0071103//GO:0065003//GO:0031497//GO:0016043//GO:0006325//GO:0009987//GO:0034728//GO:0006996//GO:0022607//GO:0071840	DNA packaging//chromosome organization//chromatin assembly or disassembly//cellular protein-containing complex assembly//protein-DNA complex subunit organization//protein-DNA complex assembly//obsolete protein complex biogenesis//nucleosome assembly//cellular component biogenesis//protein-containing complex subunit organization//biological_process//DNA conformation change//protein-containing comp…	GO:0044424//GO:0043232//GO:0043227//GO:0005694//GO:0032991//GO:0005575//GO:0043231//GO:0044422//GO:0044815//GO:0000786//GO:0043229//GO:0044446//GO:0005623//GO:0043228//GO:0044427//GO:0044464//GO:0000785//GO:0043226//GO:0032993//GO:0005622//GO:0005634	intracellular part//intracellular non-membrane-bounded organelle//membrane-bounded organelle//chromosome//protein-containing complex//cellular_component//intracellular membrane-bounded organelle//organelle part//DNA packaging complex//nucleosome//intracellular organelle//intracellular organelle part//cell//non-membrane-bounded organelle//chromosomal part//cell part//chromatin//organelle//protein-…	GO:0005488//GO:0003674//GO:0003677//GO:0003676//GO:1901363//GO:0097159	binding//molecular_function//DNA binding//nucleic acid binding//heterocyclic compound binding//organic cyclic compound binding	K11275 histone H1/5 | (RefSeq) histone H1-like	http://www.genome.jp/dbget-bin/www_bget?sot:102591139	-	Winged helix-turn-helix DNA-binding domain||Histone H5||Linker histone H1/H5, domain H15
113	PGSC0003DMG400001209	39.9225	155.059	-1.9575	3.8836e-05	0.00047207	DOWN	GO:0008152//GO:0005975//GO:0071704//GO:0008150//GO:0044238	metabolic process//carbohydrate metabolic process//organic substance metabolic process//biological_process//primary metabolic process	--	--	GO:0016798//GO:0016787//GO:0004553//GO:0003674//GO:0003824	hydrolase activity, acting on glycosyl bonds//hydrolase activity//hydrolase activity, hydrolyzing O-glycosyl compounds//molecular_function//catalytic activity	K01188 beta-glucosidase [EC:3.2.1.21] | (RefSeq) beta-glucosidase 40-like	http://www.genome.jp/dbget-bin/www_bget?sot:102597190	-	Glycoside hydrolase family 1||Glycoside hydrolase superfamily
114	PGSC0003DMG400001221	125.079	527.845	-2.0773	9.6822e-09	2.7725e-07	DOWN	GO:0048518//GO:0048511//GO:0042752//GO:0007623//GO:0042753//GO:0008150//GO:0065007//GO:0050789	positive regulation of biological process//rhythmic process//regulation of circadian rhythm//circadian rhythm//positive regulation of circadian rhythm//biological_process//biological regulation//regulation of biological process	--	--	--	--	no KO assigned | (RefSeq) protein EARLY FLOWERING 4-like	http://www.genome.jp/dbget-bin/www_bget?sot:102603103	-	Protein EARLY FLOWERING 4
115	PGSC0003DMG400001353	956.266	2706.54	-1.501	1.3406e-06	2.4359e-05	DOWN	--	--	--	--	--	--	no KO assigned | (RefSeq) EID1-like F-box protein 2	http://www.genome.jp/dbget-bin/www_bget?sot:102593388	--	--
116	PGSC0003DMG400001364	3780.55	8006.22	-1.0825	0.00028045	0.0025707	DOWN	--	--	--	--	--	--	K18635 protein SPIRAL1 and related proteins | (RefSeq) protein SPIRAL1-like 1	http://www.genome.jp/dbget-bin/www_bget?sot:102579021	--	--
117	PGSC0003DMG400001393	2514.39	9772.26	-1.9585	1.7837e-10	6.8629e-09	DOWN	GO:0051234//GO:0006810//GO:0008150//GO:0051179	establishment of localization//transport//biological_process//localization	GO:0044425//GO:0005575//GO:0016021//GO:0016020//GO:0031224	membrane part//cellular_component//integral component of membrane//membrane//intrinsic component of membrane	GO:0003674//GO:0005215	molecular_function//transporter activity	no KO assigned | (RefSeq) protein NRT1/ PTR FAMILY 5.8	http://www.genome.jp/dbget-bin/www_bget?sot:102605558	-	Major facilitator superfamily domain||Proton-dependent oligopeptide transporter family
118	PGSC0003DMG400001413	29.1705	145.453	-2.318	3.1262e-06	5.2099e-05	DOWN	--	--	--	--	--	--	K09272 structure-specific recognition protein 1 | (RefSeq) FACT complex subunit SSRP1-like	http://www.genome.jp/dbget-bin/www_bget?sot:102594303	-	High mobility group box domain||PH domain-like
119	PGSC0003DMG400001434	577.23	1454.89	-1.3337	5.1575e-05	0.00060782	DOWN	GO:1901362//GO:0080090//GO:0090304//GO:0044238//GO:0046483//GO:0009987//GO:0051171//GO:0009058//GO:0006807//GO:0010467//GO:0060255//GO:0010556//GO:0019438//GO:0034654//GO:0050794//GO:0018130//GO:0032774//GO:2000112//GO:0010468//GO:0065007//GO:0008150//GO:0031326//GO:0006355//GO:0050789//GO:0044249//GO:0031323//GO:0016070//GO:0034641//GO:0009889//GO:0006725//GO:0019222//GO:0097659//GO:0071704//GO:…	organic cyclic compound biosynthetic process//regulation of primary metabolic process//nucleic acid metabolic process//primary metabolic process//heterocycle metabolic process//cellular process//regulation of nitrogen compound metabolic process//biosynthetic process//nitrogen compound metabolic process//gene expression//regulation of macromolecule metabolic process//regulation of macromolecule bi…	--	--	GO:0097159//GO:1901363//GO:0003677//GO:0003676//GO:0043565//GO:0003700//GO:0003674//GO:0005488	organic cyclic compound binding//heterocyclic compound binding//DNA binding//nucleic acid binding//sequence-specific DNA binding//DNA-binding transcription factor activity//molecular_function//binding	no KO assigned | (RefSeq) StWRKY15; probable WRKY transcription factor 3	http://www.genome.jp/dbget-bin/www_bget?sot:102600522	-	WRKY domain
120	PGSC0003DMG400001490	2.13943	34.7512	-4.0218	0.010226	0.048113	DOWN	--	--	--	--	--	--	--	--	--	--
121	PGSC0003DMG400001573	1975.21	4199.09	-1.0881	0.00033251	0.0029755	DOWN	GO:0019752//GO:0044283//GO:1901607//GO:0000097//GO:0044249//GO:1901566//GO:1901564//GO:0008150//GO:0000096//GO:0009069//GO:0009987//GO:0019344//GO:0044238//GO:0043436//GO:0044281//GO:0006790//GO:0006534//GO:0008652//GO:0006082//GO:0006807//GO:0009058//GO:0016053//GO:0006535//GO:0044237//GO:0006563//GO:0044272//GO:0008152//GO:1901605//GO:0071704//GO:1901576//GO:0046394//GO:0009070//GO:0006520	carboxylic acid metabolic process//small molecule biosynthetic process//alpha-amino acid biosynthetic process//sulfur amino acid biosynthetic process//cellular biosynthetic process//organonitrogen compound biosynthetic process//organonitrogen compound metabolic process//biological_process//sulfur amino acid metabolic process//serine family amino acid metabolic process//cellular process//cysteine …	GO:0005623//GO:0044464//GO:0005622//GO:0044424//GO:0005737//GO:0005575	cell//cell part//intracellular//intracellular part//cytoplasm//cellular_component	GO:0003824//GO:0016747//GO:0016740//GO:0016407//GO:0016746//GO:0009001//GO:0008374//GO:0016412//GO:0016413//GO:0003674	catalytic activity//transferase activity, transferring acyl groups other than amino-acyl groups//transferase activity//acetyltransferase activity//transferase activity, transferring acyl groups//serine O-acetyltransferase activity//O-acyltransferase activity//serine O-acyltransferase activity//O-acetyltransferase activity//molecular_function	K00640 serine O-acetyltransferase [EC:2.3.1.30] | (RefSeq) serine acetyltransferase 2-like	http://www.genome.jp/dbget-bin/www_bget?sot:102590258	-	Hexapeptide repeat||Trimeric LpxA-like||Serine acetyltransferase, N-terminal||Serine O-acetyltransferase||Hexapeptide transferase, conserved site
122	PGSC0003DMG400001594	602.247	1443.25	-1.2609	7.5062e-05	0.00084038	DOWN	--	--	--	--	GO:0005515//GO:0046983//GO:0003674//GO:0005488	protein binding//protein dimerization activity//molecular_function//binding	no KO assigned | (RefSeq) transcription factor bHLH121	http://www.genome.jp/dbget-bin/www_bget?sot:102583791	bHLH121	Myc-type, basic helix-loop-helix (bHLH) domain
123	PGSC0003DMG400001617	4122.55	10107	-1.2937	1.2708e-05	0.00017928	DOWN	GO:0043170//GO:0071704//GO:0006464//GO:0044260//GO:0044237//GO:0018193//GO:0008152//GO:0018208//GO:0036211//GO:0009987//GO:0044238//GO:0019538//GO:0044267//GO:0043412//GO:0000413//GO:0008150	macromolecule metabolic process//organic substance metabolic process//cellular protein modification process//cellular macromolecule metabolic process//cellular metabolic process//peptidyl-amino acid modification//metabolic process//peptidyl-proline modification//protein modification process//cellular process//primary metabolic process//protein metabolic process//cellular protein metabolic process…	--	--	GO:0003674//GO:0003755//GO:0016853//GO:0003824//GO:0016859	molecular_function//peptidyl-prolyl cis-trans isomerase activity//isomerase activity//catalytic activity//cis-trans isomerase activity	K09578 peptidyl-prolyl cis-trans isomerase NIMA-interacting 1 [EC:5.2.1.8] | (RefSeq) peptidyl-prolyl cis-trans isomerase Pin1-like	http://www.genome.jp/dbget-bin/www_bget?sot:102599211	-	Peptidyl-prolyl cis-trans isomerase, PpiC-type
124	PGSC0003DMG400001753	908.279	1965.23	-1.1135	0.00031683	0.0028541	DOWN	GO:0071704//GO:0043170//GO:0006508//GO:0008152//GO:0019538//GO:0044238//GO:0008150	organic substance metabolic process//macromolecule metabolic process//proteolysis//metabolic process//protein metabolic process//primary metabolic process//biological_process	--	--	GO:0008233//GO:0003674//GO:0004185//GO:0008236//GO:0016787//GO:0008238//GO:0070011//GO:0070008//GO:0004180//GO:0017171//GO:0003824	peptidase activity//molecular_function//serine-type carboxypeptidase activity//serine-type peptidase activity//hydrolase activity//exopeptidase activity//peptidase activity, acting on L-amino acid peptides//serine-type exopeptidase activity//carboxypeptidase activity//serine hydrolase activity//catalytic activity	K09645 vitellogenic carboxypeptidase-like protein [EC:3.4.16.-] | (RefSeq) serine carboxypeptidase-like 50	http://www.genome.jp/dbget-bin/www_bget?sot:102592860	-	Alpha/Beta hydrolase fold||Serine carboxypeptidases, histidine active site||Serine carboxypeptidase, serine active site||Peptidase S10, serine carboxypeptidase
125	PGSC0003DMG400001775	6351.6	16026.3	-1.3352	0.0012403	0.0088536	DOWN	--	--	--	--	--	--	no KO assigned | (RefSeq) uncharacterized LOC102589403	http://www.genome.jp/dbget-bin/www_bget?sot:102589403	-	Zinc finger, RING/FYVE/PHD-type||Zinc finger, RING-type
126	PGSC0003DMG400001823	615.479	1843.48	-1.5826	6.039e-07	1.199e-05	DOWN	GO:0008152//GO:0055114//GO:0008150	metabolic process//oxidation-reduction process//biological_process	GO:0016020//GO:0016021//GO:0005575//GO:0044425//GO:0031224	membrane//integral component of membrane//cellular_component//membrane part//intrinsic component of membrane	GO:0046872//GO:0043167//GO:0003674//GO:0046906//GO:0005506//GO:0005488//GO:0004497//GO:0043169//GO:0097159//GO:0046914//GO:0020037//GO:1901363//GO:0003824//GO:0016491//GO:0016705	metal ion binding//ion binding//molecular_function//tetrapyrrole binding//iron ion binding//binding//monooxygenase activity//cation binding//organic cyclic compound binding//transition metal ion binding//heme binding//heterocyclic compound binding//catalytic activity//oxidoreductase activity//oxidoreductase activity, acting on paired donors, with incorporation or reduction of molecular oxygen	K04123 ent-kaurenoic acid hydroxylase [EC:1.14.13.79] | (RefSeq) ent-kaurenoic acid oxidase 2-like	http://www.genome.jp/dbget-bin/www_bget?sot:102603753	-	Cytochrome P450||Cytochrome P450, E-class, group IV||Cytochrome P450, conserved site
127	PGSC0003DMG400001884	143.229	294.636	-1.0406	0.0056795	0.030432	DOWN	GO:0009987//GO:0044238//GO:0043436//GO:0044281//GO:0006790//GO:0008652//GO:0006082//GO:0009066//GO:0009058//GO:0006807//GO:0019752//GO:1901607//GO:0006555//GO:0044283//GO:0044249//GO:1901566//GO:0000097//GO:0000096//GO:1901564//GO:0008150//GO:1901605//GO:0071704//GO:0009067//GO:0071265//GO:1901576//GO:0006520//GO:0009086//GO:0046394//GO:0044272//GO:0016053//GO:0044237//GO:0071266//GO:0008152	cellular process//primary metabolic process//oxoacid metabolic process//small molecule metabolic process//sulfur compound metabolic process//cellular amino acid biosynthetic process//organic acid metabolic process//aspartate family amino acid metabolic process//biosynthetic process//nitrogen compound metabolic process//carboxylic acid metabolic process//alpha-amino acid biosynthetic process//meth…	--	--	GO:0097159//GO:1901363//GO:0003824//GO:0004121//GO:0030170//GO:0043167//GO:0048037//GO:0003674//GO:0016829//GO:0043168//GO:0005488//GO:0016846	organic cyclic compound binding//heterocyclic compound binding//catalytic activity//cystathionine beta-lyase activity//pyridoxal phosphate binding//ion binding//cofactor binding//molecular_function//lyase activity//anion binding//binding//carbon-sulfur lyase activity	K01760 cystathionine beta-lyase [EC:4.4.1.8] | (RefSeq) CBL; cystathionine beta-lyase	http://www.genome.jp/dbget-bin/www_bget?sot:102577774	-	Cys/Met metabolism, pyridoxal phosphate-dependent enzyme||Pyridoxal phosphate-dependent transferase, subdomain 2||Cystathionine beta-lyase, eukaryotic
128	PGSC0003DMG400001992	1947.3	7100.83	-1.8665	9.3596e-10	3.1929e-08	DOWN	GO:0008150//GO:0006952//GO:0050896//GO:0006950	biological_process//defense response//response to stimulus//response to stress	--	--	GO:0001882//GO:0001883//GO:0030554//GO:1901363//GO:0000166//GO:0097159//GO:0032550//GO:0032549//GO:0032559//GO:0032555//GO:0005488//GO:0043531//GO:0043168//GO:0032553//GO:0036094//GO:0003674//GO:0017076//GO:1901265//GO:0043167//GO:0097367	nucleoside binding//purine nucleoside binding//adenyl nucleotide binding//heterocyclic compound binding//nucleotide binding//organic cyclic compound binding//purine ribonucleoside binding//ribonucleoside binding//adenyl ribonucleotide binding//purine ribonucleotide binding//binding//ADP binding//anion binding//ribonucleotide binding//small molecule binding//molecular_function//purine nucleotide b…	no KO assigned | (RefSeq) putative late blight resistance protein homolog R1A-3	http://www.genome.jp/dbget-bin/www_bget?sot:102579950	-	Leucine-rich repeat domain, L domain-like||NB-ARC||P-loop containing nucleoside triphosphate hydrolase||Winged helix-turn-helix DNA-binding domain
129	PGSC0003DMG400002091	857.285	1922.2	-1.1649	0.00020652	0.0019918	DOWN	--	--	--	--	--	--	--	--	--	--
130	PGSC0003DMG400002103	3816.48	7784.02	-1.0283	0.00052953	0.0043432	DOWN	GO:0006082//GO:0009056//GO:1901575//GO:0006807//GO:0009987//GO:0009071//GO:0043436//GO:0044282//GO:0044238//GO:0044248//GO:0044281//GO:0009069//GO:0006544//GO:1901564//GO:0008150//GO:0019752//GO:0019464//GO:0006520//GO:0006546//GO:1901605//GO:0071704//GO:0016054//GO:0009063//GO:0046395//GO:0044237//GO:1901565//GO:0008152//GO:1901606	organic acid metabolic process//catabolic process//organic substance catabolic process//nitrogen compound metabolic process//cellular process//serine family amino acid catabolic process//oxoacid metabolic process//small molecule catabolic process//primary metabolic process//cellular catabolic process//small molecule metabolic process//serine family amino acid metabolic process//glycine metabolic …	GO:0005960//GO:0005622//GO:1990204//GO:0043226//GO:0044464//GO:0044444//GO:0005623//GO:0043229//GO:0043231//GO:0005575//GO:0032991//GO:0005739//GO:0043227//GO:0044424//GO:1902494//GO:0005737	glycine cleavage complex//intracellular//oxidoreductase complex//organelle//cell part//cytoplasmic part//cell//intracellular organelle//intracellular membrane-bounded organelle//cellular_component//protein-containing complex//mitochondrion//membrane-bounded organelle//intracellular part//catalytic complex//cytoplasm	--	--	K02437 glycine cleavage system H protein | (RefSeq) glycine cleavage system H protein, mitochondrial-like	http://www.genome.jp/dbget-bin/www_bget?sot:102605022	-	Glycine cleavage system H-protein, subgroup||Glycine cleavage system H-protein/Simiate||Single hybrid motif||Biotin/lipoyl attachment||2-oxo acid dehydrogenase, lipoyl-binding site||Glycine cleavage system H-protein
131	PGSC0003DMG400002129	77.8006	292.342	-1.9098	1.5333e-06	2.7359e-05	DOWN	--	--	--	--	--	--	--	--	--	--
132	PGSC0003DMG400002138	364.304	971.08	-1.4144	1.4347e-05	0.00019948	DOWN	--	--	--	--	GO:0003676//GO:0003677//GO:1901363//GO:0097159//GO:0005488//GO:0003674	nucleic acid binding//DNA binding//heterocyclic compound binding//organic cyclic compound binding//binding//molecular_function	no KO assigned | (RefSeq) telomere repeat-binding protein 5-like	http://www.genome.jp/dbget-bin/www_bget?sot:102584447	-	Ubiquitin-related domain||Ubiquitin domain||Homeobox domain-like||SANT/Myb domain||Myb domain
133	PGSC0003DMG400002146	826.474	3430.92	-2.0536	1.8034e-09	5.8479e-08	DOWN	GO:0048511//GO:0007623//GO:0008150	rhythmic process//circadian rhythm//biological_process	GO:0042644//GO:0044435//GO:0031984//GO:0016020//GO:0043227//GO:0009535//GO:0005694//GO:0005575//GO:0009526//GO:0043231//GO:0000229//GO:0044422//GO:0043229//GO:0044446//GO:0005737//GO:0009507//GO:0044425//GO:0055035//GO:0044424//GO:0042651//GO:0043232//GO:0009295//GO:0031975//GO:0009532//GO:0009941//GO:0044464//GO:0043226//GO:0005622//GO:0009579//GO:0042646//GO:0034357//GO:0098572//GO:0044444//GO:…	chloroplast nucleoid//plastid part//organelle subcompartment//membrane//membrane-bounded organelle//chloroplast thylakoid membrane//chromosome//cellular_component//plastid envelope//intracellular membrane-bounded organelle//cytoplasmic chromosome//organelle part//intracellular organelle//intracellular organelle part//cytoplasm//chloroplast//membrane part//plastid thylakoid membrane//intracellular…	--	--	no KO assigned | (RefSeq) protein plastid transcriptionally active 16, chloroplastic	http://www.genome.jp/dbget-bin/www_bget?sot:102588617	PTAC16	NAD(P)-binding domain
134	PGSC0003DMG400002149	788.435	1584.13	-1.0066	0.0012875	0.0091225	DOWN	--	--	--	--	--	--	K12593 M-phase phosphoprotein 6, animal type | (RefSeq) uncharacterized LOC102585757	http://www.genome.jp/dbget-bin/www_bget?sot:102585757	-	M-phase phosphoprotein 6
135	PGSC0003DMG400002286	91.9539	286.953	-1.6418	3.5154e-05	0.00043351	DOWN	--	--	--	--	--	--	--	--	--	--
136	PGSC0003DMG400002288	71.2378	171.07	-1.2639	0.0038942	0.022393	DOWN	--	--	--	--	--	--	--	--	--	--
137	PGSC0003DMG400002292	395.298	1253.79	-1.6653	0.00012901	0.001334	DOWN	--	--	--	--	--	--	no KO assigned | (RefSeq) uncharacterized LOC102587686	http://www.genome.jp/dbget-bin/www_bget?sot:102587686	--	--
138	PGSC0003DMG400002314	12.1628	54.1314	-2.154	0.0022785	0.014546	DOWN	--	--	--	--	GO:0005488//GO:0008270//GO:0046872//GO:0043167//GO:0003674//GO:0043169//GO:0046914	binding//zinc ion binding//metal ion binding//ion binding//molecular_function//cation binding//transition metal ion binding	no KO assigned | (RefSeq) uncharacterized LOC102579233	http://www.genome.jp/dbget-bin/www_bget?sot:102579233	-	Zinc finger, PMZ-type||Zinc finger, SWIM-type
139	PGSC0003DMG400002328	1494.96	3009.61	-1.0095	0.00095278	0.0071275	DOWN	GO:0009058//GO:0008150//GO:0008152	biosynthetic process//biological_process//metabolic process	--	--	GO:0016843//GO:0003824//GO:0016844//GO:0003674//GO:0016840//GO:0016829	amine-lyase activity//catalytic activity//strictosidine synthase activity//molecular_function//carbon-nitrogen lyase activity//lyase activity	no KO assigned | (RefSeq) protein STRICTOSIDINE SYNTHASE-LIKE 4-like	http://www.genome.jp/dbget-bin/www_bget?sot:102599193	-	Strictosidine synthase||Strictosidine synthase, conserved region||Six-bladed beta-propeller, TolB-like
140	PGSC0003DMG400002417	123.191	270.866	-1.1367	0.0030372	0.018369	DOWN	--	--	--	--	--	--	no KO assigned | (RefSeq) uncharacterized LOC102598203	http://www.genome.jp/dbget-bin/www_bget?sot:102598203	--	--
141	PGSC0003DMG400002450	156.172	329.309	-1.0763	0.0040425	0.023108	DOWN	GO:0008150//GO:0008152//GO:0032259	biological_process//metabolic process//methylation	--	--	GO:0003824//GO:0016740//GO:0016741//GO:0003674//GO:0008168	catalytic activity//transferase activity//transferase activity, transferring one-carbon groups//molecular_function//methyltransferase activity	no KO assigned | (RefSeq) probable methyltransferase PMT6	http://www.genome.jp/dbget-bin/www_bget?sot:102596444	-	Putative S-adenosyl-L-methionine-dependent methyltransferase
142	PGSC0003DMG400002533	11.3667	49.4018	-2.1198	0.0036179	0.021122	DOWN	--	--	--	--	--	--	no KO assigned | (RefSeq) uncharacterized LOC102582031	http://www.genome.jp/dbget-bin/www_bget?sot:102582031	--	--
143	PGSC0003DMG400002560	273.34	611.137	-1.1608	0.00063573	0.0050812	DOWN	GO:0051276//GO:0070925//GO:0034622//GO:0070271//GO:0065004//GO:0071824//GO:0065003//GO:0008150//GO:0034508//GO:0044085//GO:0051383//GO:0043933//GO:0071840//GO:0022607//GO:0006996//GO:0051382//GO:0016043//GO:0009987	chromosome organization//organelle assembly//cellular protein-containing complex assembly//obsolete protein complex biogenesis//protein-DNA complex assembly//protein-DNA complex subunit organization//protein-containing complex assembly//biological_process//centromere complex assembly//cellular component biogenesis//kinetochore organization//protein-containing complex subunit organization//cellula…	GO:0043232//GO:0000776//GO:0044424//GO:0005575//GO:0043229//GO:0044446//GO:0044422//GO:0032991//GO:0005694//GO:0043228//GO:0044427//GO:0005623//GO:0098687//GO:0000775//GO:0005622//GO:0043226//GO:0044464	intracellular non-membrane-bounded organelle//kinetochore//intracellular part//cellular_component//intracellular organelle//intracellular organelle part//organelle part//protein-containing complex//chromosome//non-membrane-bounded organelle//chromosomal part//cell//chromosomal region//chromosome, centromeric region//intracellular//organelle//cell part	GO:0005488//GO:0003674//GO:0043565//GO:1901363//GO:0003676//GO:0003677//GO:0019237//GO:0097159	binding//molecular_function//sequence-specific DNA binding//heterocyclic compound binding//nucleic acid binding//DNA binding//centromeric DNA binding//organic cyclic compound binding	no KO assigned | (RefSeq) uncharacterized LOC102577589	http://www.genome.jp/dbget-bin/www_bget?sot:102577589	CENP-C	Centromere protein C/Mif2/cnp3
144	PGSC0003DMG400002562	452.905	2633.7	-2.5398	2.788e-15	2.2748e-13	DOWN	--	--	--	--	--	--	no KO assigned | (RefSeq) F-box/kelch-repeat protein At1g80440-like	http://www.genome.jp/dbget-bin/www_bget?sot:102600996	-	Kelch repeat type 2||Kelch repeat type 1||Kelch-type beta propeller||F-box domain
145	PGSC0003DMG400002626	961.515	3556.2	-1.887	5.102e-05	0.0006027	DOWN	GO:0009987//GO:0008150//GO:0015979//GO:0008152//GO:0044237	cellular process//biological_process//photosynthesis//metabolic process//cellular metabolic process	GO:0044464//GO:0034357//GO:0005622//GO:0009579//GO:0044436//GO:0005623//GO:0009521//GO:0098796//GO:0009522//GO:0016020//GO:0032991//GO:0009538//GO:0005575//GO:0044425//GO:0044424	cell part//photosynthetic membrane//intracellular//thylakoid//thylakoid part//cell//photosystem//membrane protein complex//photosystem I//membrane//protein-containing complex//photosystem I reaction center//cellular_component//membrane part//intracellular part	--	--	K02695 photosystem I subunit VI | (RefSeq) photosystem I reaction center subunit VI, chloroplastic-like	http://www.genome.jp/dbget-bin/www_bget?sot:102590963	-	Signal peptide, camelysin||Photosystem I PsaH, reaction centre subunit VI
146	PGSC0003DMG400002662	31.9456	231.702	-2.8586	4.4624e-05	0.00053436	DOWN	--	--	--	--	--	--	--	--	--	--
147	PGSC0003DMG400002762	1301.37	2856.43	-1.1342	0.00023031	0.002179	DOWN	GO:0065007//GO:0050801//GO:0098662//GO:0006810//GO:0055082//GO:0051234//GO:0008150//GO:0055065//GO:0055072//GO:0034755//GO:0030001//GO:0098771//GO:0000041//GO:0006879//GO:0051179//GO:0098655//GO:0006873//GO:0019725//GO:0009987//GO:0006812//GO:0055085//GO:0042592//GO:0006811//GO:0046916//GO:0055080//GO:0055076//GO:0065008//GO:0006875//GO:0030003//GO:0034220//GO:0098660//GO:0006826//GO:0048878	biological regulation//ion homeostasis//inorganic cation transmembrane transport//transport//cellular chemical homeostasis//establishment of localization//biological_process//metal ion homeostasis//iron ion homeostasis//iron ion transmembrane transport//metal ion transport//inorganic ion homeostasis//transition metal ion transport//cellular iron ion homeostasis//localization//cation transmembrane…	GO:0044434//GO:0031967//GO:0044444//GO:0005623//GO:0009536//GO:0005622//GO:0031975//GO:0031224//GO:0043226//GO:0044464//GO:0009941//GO:0044425//GO:0009507//GO:0005737//GO:0044424//GO:0043231//GO:0009526//GO:0005575//GO:0044446//GO:0043229//GO:0016021//GO:0044422//GO:0016020//GO:0043227//GO:0044435	chloroplast part//organelle envelope//cytoplasmic part//cell//plastid//intracellular//envelope//intrinsic component of membrane//organelle//cell part//chloroplast envelope//membrane part//chloroplast//cytoplasm//intracellular part//intracellular membrane-bounded organelle//plastid envelope//cellular_component//intracellular organelle part//intracellular organelle//integral component of membrane//…	GO:0022857//GO:0046915//GO:0022890//GO:0015075//GO:0008324//GO:0005381//GO:0046873//GO:0005215//GO:0003674	transmembrane transporter activity//transition metal ion transmembrane transporter activity//inorganic cation transmembrane transporter activity//ion transmembrane transporter activity//cation transmembrane transporter activity//iron ion transmembrane transporter activity//metal ion transmembrane transporter activity//transporter activity//molecular_function	no KO assigned | (RefSeq) solute carrier family 40 member 3, chloroplastic	http://www.genome.jp/dbget-bin/www_bget?sot:102582045	ATIREG3	Major facilitator superfamily domain||-||Ferroporti-1
148	PGSC0003DMG400002782	5133.21	28671.5	-2.4817	6.8374e-16	5.9366e-14	DOWN	GO:0008152//GO:0015979//GO:0044237//GO:0010109//GO:0019222//GO:0042548//GO:0050794//GO:0042549//GO:0006091//GO:0065007//GO:0019684//GO:0008150//GO:0050789//GO:0043467//GO:0031323//GO:0009987	metabolic process//photosynthesis//cellular metabolic process//regulation of photosynthesis//regulation of metabolic process//regulation of photosynthesis, light reaction//regulation of cellular process//photosystem II stabilization//generation of precursor metabolites and energy//biological regulation//photosynthesis, light reaction//biological_process//regulation of biological process//regulati…	GO:1902494//GO:0044425//GO:0044424//GO:0009654//GO:0042651//GO:0016020//GO:0032991//GO:0005575//GO:0016021//GO:0044436//GO:0005623//GO:0009521//GO:0009523//GO:0098796//GO:0031224//GO:0019898//GO:0044464//GO:0034357//GO:0005622//GO:1990204//GO:0009579	catalytic complex//membrane part//intracellular part//photosystem II oxygen evolving complex//thylakoid membrane//membrane//protein-containing complex//cellular_component//integral component of membrane//thylakoid part//cell//photosystem//photosystem II//membrane protein complex//intrinsic component of membrane//extrinsic component of membrane//cell part//photosynthetic membrane//intracellular//o…	GO:0005488//GO:0005509//GO:0043167//GO:0046872//GO:0003674//GO:0043169	binding//calcium ion binding//ion binding//metal ion binding//molecular_function//cation binding	K02716 photosystem II oxygen-evolving enhancer protein 1 | (RefSeq) MSP; oxygen-evolving enhancer protein 1, chloroplastic	http://www.genome.jp/dbget-bin/www_bget?sot:102577458	-	Photosystem II PsbO, manganese-stabilising||Outer membrane protein/outer membrane enzyme PagP, beta-barrel
149	PGSC0003DMG400002804	357.614	929.903	-1.3787	5.6932e-05	0.00066359	DOWN	GO:0008150//GO:0050896//GO:0006950	biological_process//response to stimulus//response to stress	--	--	--	--	no KO assigned | (RefSeq) universal stress protein A-like protein	http://www.genome.jp/dbget-bin/www_bget?sot:102603140	-	Universal stress protein A||UspA||Rossmann-like alpha/beta/alpha sandwich fold
150	PGSC0003DMG400002839	4.76299	33.9867	-2.835	0.0021673	0.013992	DOWN	GO:0046903//GO:0009987//GO:0032940//GO:0051179//GO:0006887//GO:0008150//GO:0051234//GO:0006810//GO:0016192//GO:0051649//GO:0051641	secretion//cellular process//secretion by cell//localization//exocytosis//biological_process//establishment of localization//transport//vesicle-mediated transport//establishment of localization in cell//cellular localization	GO:0044464//GO:0005622//GO:0005623//GO:0044444//GO:0044448//GO:0005938//GO:0032991//GO:0005575//GO:0000145//GO:0005737//GO:0071944//GO:0044424	cell part//intracellular//cell//cytoplasmic part//cell cortex part//cell cortex//protein-containing complex//cellular_component//exocyst//cytoplasm//cell periphery//intracellular part	--	--	K19986 exocyst complex component 8 | (RefSeq) exocyst complex component EXO84A-like	http://www.genome.jp/dbget-bin/www_bget?sot:102590493	-	Exocyst component Exo84, C-terminal||Cullin repeat-like-containing domain||Exocyst complex component Exo84
151	PGSC0003DMG400002901	59.0648	255.211	-2.1113	3.6216e-07	7.6115e-06	DOWN	GO:0018298//GO:0008150//GO:0019684//GO:0043412//GO:0044267//GO:0006091//GO:0019538//GO:0044238//GO:0009987//GO:0036211//GO:0044237//GO:0008152//GO:0015979//GO:0044260//GO:0006464//GO:0009765//GO:0071704//GO:0043170	protein-chromophore linkage//biological_process//photosynthesis, light reaction//macromolecule modification//cellular protein metabolic process//generation of precursor metabolites and energy//protein metabolic process//primary metabolic process//cellular process//protein modification process//cellular metabolic process//metabolic process//photosynthesis//cellular macromolecule metabolic process/…	GO:0009522//GO:0098796//GO:0009523//GO:0031976//GO:0044434//GO:0009521//GO:0009536//GO:0005623//GO:0044444//GO:0044436//GO:0009534//GO:0009579//GO:0005622//GO:0034357//GO:0044464//GO:0043226//GO:0031224//GO:0042651//GO:0044424//GO:0055035//GO:0005737//GO:0044425//GO:0009507//GO:0016021//GO:0044422//GO:0044446//GO:0043229//GO:0005575//GO:0043231//GO:0032991//GO:0031984//GO:0044435//GO:0009535//GO:…	photosystem I//membrane protein complex//photosystem II//plastid thylakoid//chloroplast part//photosystem//plastid//cell//cytoplasmic part//thylakoid part//chloroplast thylakoid//thylakoid//intracellular//photosynthetic membrane//cell part//organelle//intrinsic component of membrane//thylakoid membrane//intracellular part//plastid thylakoid membrane//cytoplasm//membrane part//chloroplast//integra…	GO:1901363//GO:0097159//GO:0005488//GO:0046906//GO:0016168//GO:0003674	heterocyclic compound binding//organic cyclic compound binding//binding//tetrapyrrole binding//chlorophyll binding//molecular_function	K08908 light-harvesting complex I chlorophyll a/b binding protein 2 | (RefSeq) chlorophyll a-b binding protein, chloroplastic	http://www.genome.jp/dbget-bin/www_bget?sot:102580711	LHCA6	Chlorophyll A-B binding protein, plant||Chlorophyll a/b binding protein domain||Chlorophyll A-B binding protein
152	PGSC0003DMG400003007	177.703	415.378	-1.225	0.0013719	0.0096153	DOWN	GO:0006793//GO:0018108//GO:0044237//GO:0018193//GO:0008152//GO:0006464//GO:0044260//GO:0043170//GO:0071704//GO:0016310//GO:0008150//GO:0044267//GO:0043412//GO:0006796//GO:0019538//GO:0018212//GO:0036211//GO:0009987//GO:0006468//GO:0044238	phosphorus metabolic process//peptidyl-tyrosine phosphorylation//cellular metabolic process//peptidyl-amino acid modification//metabolic process//cellular protein modification process//cellular macromolecule metabolic process//macromolecule metabolic process//organic substance metabolic process//phosphorylation//biological_process//cellular protein metabolic process//macromolecule modification//p…	GO:0071944//GO:0005575//GO:0016020//GO:0005886//GO:0005623//GO:0044464	cell periphery//cellular_component//membrane//plasma membrane//cell//cell part	GO:0005488//GO:0032555//GO:0035639//GO:0032550//GO:0032549//GO:0032559//GO:0016301//GO:0043168//GO:0005524//GO:0032553//GO:0017076//GO:0036094//GO:0003674//GO:0097367//GO:0043167//GO:1901265//GO:0004672//GO:0016772//GO:0016740//GO:0001882//GO:1901363//GO:0000166//GO:0001883//GO:0003824//GO:0030554//GO:0016773//GO:0004713//GO:0097159	binding//purine ribonucleotide binding//purine ribonucleoside triphosphate binding//purine ribonucleoside binding//ribonucleoside binding//adenyl ribonucleotide binding//kinase activity//anion binding//ATP binding//ribonucleotide binding//purine nucleotide binding//small molecule binding//molecular_function//carbohydrate derivative binding//ion binding//nucleoside phosphate binding//protein kinas…	K04733 interleukin-1 receptor-associated kinase 4 [EC:2.7.11.1] | (RefSeq) probable receptor-like protein kinase At1g49730	http://www.genome.jp/dbget-bin/www_bget?sot:102605684	-	Serine-threonine/tyrosine-protein kinase, catalytic domain||Protein kinase-like domain||Protein kinase domain||Tyrosine-protein kinase, catalytic domain
153	PGSC0003DMG400003013	681.052	1735.24	-1.3493	9.864e-06	0.00014295	DOWN	GO:0044238//GO:0008150//GO:0005975//GO:0071704//GO:0008152	primary metabolic process//biological_process//carbohydrate metabolic process//organic substance metabolic process//metabolic process	--	--	GO:0003824//GO:0003674//GO:0016798//GO:0016787//GO:0004553	catalytic activity//molecular_function//hydrolase activity, acting on glycosyl bonds//hydrolase activity//hydrolase activity, hydrolyzing O-glycosyl compounds	K05349 beta-glucosidase [EC:3.2.1.21] | (RefSeq) beta-glucosidase BoGH3B-like	http://www.genome.jp/dbget-bin/www_bget?sot:102599864	-	Glycoside hydrolase superfamily||Glycoside hydrolase, family 3, N-terminal||Glycoside hydrolase family 3 C-terminal domain
154	PGSC0003DMG400003032	571.202	1422.16	-1.316	4.0413e-05	0.00048924	DOWN	GO:0008152//GO:0055114//GO:0008150	metabolic process//oxidation-reduction process//biological_process	GO:0016020//GO:0005575//GO:0016021//GO:0044425//GO:0031224	membrane//cellular_component//integral component of membrane//membrane part//intrinsic component of membrane	GO:0043167//GO:0046872//GO:0003674//GO:0046906//GO:0004497//GO:0005506//GO:0005488//GO:0097159//GO:0043169//GO:0046914//GO:0003824//GO:1901363//GO:0020037//GO:0016705//GO:0016491	ion binding//metal ion binding//molecular_function//tetrapyrrole binding//monooxygenase activity//iron ion binding//binding//organic cyclic compound binding//cation binding//transition metal ion binding//catalytic activity//heterocyclic compound binding//heme binding//oxidoreductase activity, acting on paired donors, with incorporation or reduction of molecular oxygen//oxidoreductase activity	no KO assigned | (RefSeq) probable (S)-N-methylcoclaurine 3'-hydroxylase isozyme 2	http://www.genome.jp/dbget-bin/www_bget?sot:102594046	-	Cytochrome P450, conserved site||Cytochrome P450||Cytochrome P450, E-class, group I
155	PGSC0003DMG400003056	7243.01	50317	-2.7964	3.2858e-19	4.1463e-17	DOWN	GO:0050794//GO:0032269//GO:0044267//GO:0050896//GO:0051248//GO:0052548//GO:0060255//GO:0051246//GO:0031323//GO:0050789//GO:0043086//GO:0065007//GO:0048523//GO:0051346//GO:0008150//GO:0009987//GO:0031324//GO:0044238//GO:0065009//GO:0080090//GO:0048519//GO:0009611//GO:0019538//GO:0052547//GO:0045861//GO:0044237//GO:0010466//GO:0008152//GO:0050790//GO:0006950//GO:0051336//GO:0009892//GO:0006508//GO:…	regulation of cellular process//negative regulation of cellular protein metabolic process//cellular protein metabolic process//response to stimulus//negative regulation of protein metabolic process//regulation of endopeptidase activity//regulation of macromolecule metabolic process//regulation of protein metabolic process//regulation of cellular metabolic process//regulation of biological process…	--	--	GO:0004867//GO:0061135//GO:0098772//GO:0004866//GO:0030414//GO:0030234//GO:0061134//GO:0004857//GO:0003674	serine-type endopeptidase inhibitor activity//endopeptidase regulator activity//molecular function regulator//endopeptidase inhibitor activity//peptidase inhibitor activity//enzyme regulator activity//peptidase regulator activity//enzyme inhibitor activity//molecular_function	no KO assigned | (RefSeq) ethylene-responsive proteinase inhibitor 1	http://www.genome.jp/dbget-bin/www_bget?sot:102585421	-	Proteinase inhibitor I13, potato inhibitor I
156	PGSC0003DMG400003069	1445.91	3752.08	-1.3757	7.0688e-06	0.00010757	DOWN	GO:0071704//GO:0043170//GO:0006508//GO:0008152//GO:0019538//GO:0044238//GO:0008150	organic substance metabolic process//macromolecule metabolic process//proteolysis//metabolic process//protein metabolic process//primary metabolic process//biological_process	GO:0016021//GO:0005575//GO:0016020//GO:0044425//GO:0031224	integral component of membrane//cellular_component//membrane//membrane part//intrinsic component of membrane	GO:0008233//GO:0003674//GO:0008236//GO:0016787//GO:0070011//GO:0017171//GO:0003824	peptidase activity//molecular_function//serine-type peptidase activity//hydrolase activity//peptidase activity, acting on L-amino acid peptides//serine hydrolase activity//catalytic activity	no KO assigned | (RefSeq) carboxyl-terminal-processing peptidase 1, chloroplastic	http://www.genome.jp/dbget-bin/www_bget?sot:102591033	-	ClpP/crotonase-like domain||Tail specific protease||PDZ domain||C-terminal-processing peptidase S41A
157	PGSC0003DMG400003102	995.784	2814.16	-1.4988	1.2461e-06	2.2809e-05	DOWN	GO:0019853//GO:0008152//GO:0042364//GO:0016053//GO:0006767//GO:0044237//GO:0046394//GO:0005975//GO:1901576//GO:0005996//GO:0071704//GO:0016051//GO:0008150//GO:0044249//GO:0044283//GO:0019852//GO:0019752//GO:0009110//GO:0009058//GO:0055114//GO:0006082//GO:0046364//GO:0044281//GO:0006766//GO:0009987//GO:0044238//GO:0043436	L-ascorbic acid biosynthetic process//metabolic process//water-soluble vitamin biosynthetic process//organic acid biosynthetic process//water-soluble vitamin metabolic process//cellular metabolic process//carboxylic acid biosynthetic process//carbohydrate metabolic process//organic substance biosynthetic process//monosaccharide metabolic process//organic substance metabolic process//carbohydrate …	GO:0005737//GO:0044424//GO:0005575//GO:0044444//GO:0005623//GO:0005829//GO:0005622//GO:0044464	cytoplasm//intracellular part//cellular_component//cytoplasmic part//cell//cytosol//intracellular//cell part	GO:0016646//GO:0003674//GO:0016491//GO:0003824//GO:0016645//GO:0010349	oxidoreductase activity, acting on the CH-NH group of donors, NAD or NADP as acceptor//molecular_function//oxidoreductase activity//catalytic activity//oxidoreductase activity, acting on the CH-NH group of donors//L-galactose dehydrogenase activity	K17744 L-galactose dehydrogenase [EC:1.1.1.316] | (RefSeq) L-galactose dehydrogenase	http://www.genome.jp/dbget-bin/www_bget?sot:102599558	-	NADP-dependent oxidoreductase domain
158	PGSC0003DMG400003107	268.929	551.164	-1.0353	0.0023193	0.014736	DOWN	--	--	--	--	--	--	--	--	-	Cysteine-rich transmembrane CYSTM domain
159	PGSC0003DMG400003124	9.20491	92.5144	-3.3292	2.2536e-07	4.9677e-06	DOWN	GO:0030243//GO:0016052//GO:0005975//GO:0044260//GO:0044275//GO:0044247//GO:0044042//GO:0044262//GO:0071704//GO:0043170//GO:0008152//GO:0030245//GO:0044237//GO:0044264//GO:0009056//GO:1901575//GO:0005976//GO:0044248//GO:0009057//GO:0044238//GO:0009987//GO:0006073//GO:0008150//GO:0009251//GO:0051273//GO:0051275//GO:0000272	cellulose metabolic process//carbohydrate catabolic process//carbohydrate metabolic process//cellular macromolecule metabolic process//cellular carbohydrate catabolic process//cellular polysaccharide catabolic process//glucan metabolic process//cellular carbohydrate metabolic process//organic substance metabolic process//macromolecule metabolic process//metabolic process//cellulose catabolic proc…	--	--	GO:0003674//GO:0016798//GO:0016787//GO:0004553//GO:0008810//GO:0003824	molecular_function//hydrolase activity, acting on glycosyl bonds//hydrolase activity//hydrolase activity, hydrolyzing O-glycosyl compounds//cellulase activity//catalytic activity	K01179 endoglucanase [EC:3.2.1.4] | (RefSeq) endoglucanase 24-like	http://www.genome.jp/dbget-bin/www_bget?sot:102579821	-	Glycoside hydrolase family 9||Six-hairpin glycosidase-like||Glycosyl hydrolases family 9, Asp/Glu active sites
160	PGSC0003DMG400003133	1433.24	2906.79	-1.0201	0.00079754	0.0061516	DOWN	--	--	--	--	--	--	no KO assigned | (RefSeq) pentatricopeptide repeat-containing protein At3g53170	http://www.genome.jp/dbget-bin/www_bget?sot:102579509	-	Tetratricopeptide-like helical domain||Pentatricopeptide repeat
161	PGSC0003DMG400003197	749.153	1537.2	-1.037	0.00096777	0.0072251	DOWN	--	--	--	--	--	--	no KO assigned | (RefSeq) alpha/beta hydrolase domain-containing protein 17B-like	http://www.genome.jp/dbget-bin/www_bget?sot:102598793	-	Alpha/beta hydrolase fold-1||Alpha/Beta hydrolase fold
162	PGSC0003DMG400003218	4017.38	8533.32	-1.0869	0.00029411	0.002672	DOWN	GO:0034641//GO:0044249//GO:1901566//GO:0008150//GO:1901564//GO:0006414//GO:0044267//GO:0010467//GO:0043603//GO:0006807//GO:0019538//GO:0009058//GO:0009987//GO:0044238//GO:0006412//GO:0044271//GO:0043043//GO:0044237//GO:0008152//GO:0044260//GO:1901576//GO:0009059//GO:0043604//GO:0034645//GO:0043170//GO:0071704//GO:0006518	cellular nitrogen compound metabolic process//cellular biosynthetic process//organonitrogen compound biosynthetic process//biological_process//organonitrogen compound metabolic process//translational elongation//cellular protein metabolic process//gene expression//cellular amide metabolic process//nitrogen compound metabolic process//protein metabolic process//biosynthetic process//cellular proce…	GO:0043228//GO:0044444//GO:0005623//GO:0005622//GO:0044464//GO:0043226//GO:0043232//GO:0005840//GO:0044424//GO:0005737//GO:0043229//GO:0005575//GO:0032991	non-membrane-bounded organelle//cytoplasmic part//cell//intracellular//cell part//organelle//intracellular non-membrane-bounded organelle//ribosome//intracellular part//cytoplasm//intracellular organelle//cellular_component//protein-containing complex	GO:0003676//GO:1901363//GO:0003723//GO:0003735//GO:0005198//GO:0097159//GO:0005488//GO:0003674	nucleic acid binding//heterocyclic compound binding//RNA binding//structural constituent of ribosome//structural molecule activity//organic cyclic compound binding//binding//molecular_function	K12890 splicing factor, arginine/serine-rich 1 | (RefSeq) pre-mRNA splicing factor-like protein	http://www.genome.jp/dbget-bin/www_bget?sot:102577891	SRp34a	RNA recognition motif domain||Ribosomal protein L12 family
163	PGSC0003DMG400003320	2.87225	25.0204	-3.1228	0.0045319	0.025364	DOWN	--	--	--	--	--	--	no KO assigned | (RefSeq) uncharacterized LOC102593221	http://www.genome.jp/dbget-bin/www_bget?sot:102593221	-	VQ
164	PGSC0003DMG400003344	155.617	489.647	-1.6537	8.396e-05	0.00092539	DOWN	GO:0019538//GO:0006796//GO:0036211//GO:0018212//GO:0044238//GO:0006468//GO:0009987//GO:0008150//GO:0043412//GO:0044267//GO:0044260//GO:0006464//GO:0016310//GO:0071704//GO:0043170//GO:0006793//GO:0018193//GO:0008152//GO:0018108//GO:0044237	protein metabolic process//phosphate-containing compound metabolic process//protein modification process//peptidyl-tyrosine modification//primary metabolic process//protein phosphorylation//cellular process//biological_process//macromolecule modification//cellular protein metabolic process//cellular macromolecule metabolic process//cellular protein modification process//phosphorylation//organic s…	--	--	GO:0004713//GO:0016773//GO:0097159//GO:0016740//GO:0016772//GO:0001882//GO:0004672//GO:0001883//GO:0030554//GO:0003824//GO:1901363//GO:0000166//GO:0036094//GO:0003674//GO:0017076//GO:0043167//GO:1901265//GO:0097367//GO:0032550//GO:0032559//GO:0032549//GO:0032555//GO:0005488//GO:0035639//GO:0005524//GO:0043168//GO:0032553//GO:0016301	protein tyrosine kinase activity//phosphotransferase activity, alcohol group as acceptor//organic cyclic compound binding//transferase activity//transferase activity, transferring phosphorus-containing groups//nucleoside binding//protein kinase activity//purine nucleoside binding//adenyl nucleotide binding//catalytic activity//heterocyclic compound binding//nucleotide binding//small molecule bind…	K04733 interleukin-1 receptor-associated kinase 4 [EC:2.7.11.1] | (RefSeq) inactive protein kinase SELMODRAFT_444075-like	http://www.genome.jp/dbget-bin/www_bget?sot:102588014	-	Tyrosine-protein kinase, catalytic domain||Protein kinase domain||Rossmann-like alpha/beta/alpha sandwich fold||Tyrosine-protein kinase, active site||Serine-threonine/tyrosine-protein kinase, catalytic domain||Protein kinase-like domain
165	PGSC0003DMG400003393	919.73	2068.08	-1.169	0.00016014	0.0016079	DOWN	--	--	--	--	--	--	no KO assigned | (RefSeq) filament-like plant protein 3	http://www.genome.jp/dbget-bin/www_bget?sot:102581118	-	Filament-like plant protein
166	PGSC0003DMG400003457	164.011	338.578	-1.0457	0.0038761	0.022311	DOWN	--	--	--	--	--	--	K19761 gamma-glutamylaminecyclotransferase [EC:2.3.2.-] | (RefSeq) putative gamma-glutamylcyclotransferase At3g02910	http://www.genome.jp/dbget-bin/www_bget?sot:102588681	-	Gamma-glutamyl cyclotransferase-like||Gamma-glutamylcyclotransferase, AIG2-like
167	PGSC0003DMG400003477	377.472	770.31	-1.0291	0.0020817	0.013533	DOWN	--	--	GO:0031224//GO:0044425//GO:0016021//GO:0005575//GO:0016020	intrinsic component of membrane//membrane part//integral component of membrane//cellular_component//membrane	--	--	no KO assigned | (RefSeq) vacuolar iron transporter homolog 1-like	http://www.genome.jp/dbget-bin/www_bget?sot:102580357	-	Ccc1 family
168	PGSC0003DMG400003516	190.582	538.305	-1.498	2.2785e-05	0.000298	DOWN	--	--	--	--	--	--	no KO assigned | (RefSeq) auxilin-like protein 1	http://www.genome.jp/dbget-bin/www_bget?sot:102586759	-	DnaJ domain
169	PGSC0003DMG400003548	6302.61	22518.9	-1.8371	1.3743e-09	4.568e-08	DOWN	GO:0042278//GO:0006753//GO:0009141//GO:0006793//GO:0072524//GO:0032787//GO:0006139//GO:1901360//GO:0008152//GO:0046939//GO:0009144//GO:0044237//GO:0005975//GO:0046496//GO:0046034//GO:0016052//GO:0055086//GO:0009161//GO:0006725//GO:0016310//GO:0019362//GO:0006096//GO:0009117//GO:0009132//GO:0071704//GO:0009123//GO:0009199//GO:0006733//GO:0006757//GO:1901564//GO:0008150//GO:0009259//GO:0006090//GO:…	purine nucleoside metabolic process//nucleoside phosphate metabolic process//nucleoside triphosphate metabolic process//phosphorus metabolic process//pyridine-containing compound metabolic process//monocarboxylic acid metabolic process//nucleobase-containing compound metabolic process//organic cyclic compound metabolic process//metabolic process//nucleotide phosphorylation//purine nucleoside trip…	--	--	GO:0016832//GO:0016829//GO:0004332//GO:0003674//GO:0003824//GO:0016830	aldehyde-lyase activity//lyase activity//fructose-bisphosphate aldolase activity//molecular_function//catalytic activity//carbon-carbon lyase activity	K01623 fructose-bisphosphate aldolase, class I [EC:4.1.2.13] | (RefSeq) fructose-bisphosphate aldolase 1, chloroplastic-like	http://www.genome.jp/dbget-bin/www_bget?sot:102606020	-	Aldolase-type TIM barrel||Fructose-bisphosphate aldolase class-I active site||Fructose-bisphosphate aldolase, class-I
170	PGSC0003DMG400003553	600.103	1787.05	-1.5743	6.7013e-07	1.3112e-05	DOWN	--	--	--	--	--	--	no KO assigned | (RefSeq) BBR/BPC2; barley B recombinant-like protein D-like	http://www.genome.jp/dbget-bin/www_bget?sot:102584222	-	GAGA-binding transcriptional activator
171	PGSC0003DMG400003597	213.765	447.823	-1.0669	0.0026524	0.016467	DOWN	--	--	--	--	--	--	no KO assigned | (RefSeq) protein N-lysine methyltransferase METTL21A	http://www.genome.jp/dbget-bin/www_bget?sot:102581144	-	S-adenosyl-L-methionine-dependent methyltransferase||Lysine methyltransferase
172	PGSC0003DMG400003608	251.024	621.059	-1.3069	0.00014961	0.0015155	DOWN	GO:0008152//GO:0008150//GO:0055114	metabolic process//biological_process//oxidation-reduction process	GO:0044425//GO:0005575//GO:0016021//GO:0016020//GO:0031224	membrane part//cellular_component//integral component of membrane//membrane//intrinsic component of membrane	GO:0004497//GO:0005506//GO:0005488//GO:0046906//GO:0003674//GO:0043167//GO:0046872//GO:0016705//GO:0016491//GO:0003824//GO:0020037//GO:1901363//GO:0046914//GO:0097159//GO:0043169	monooxygenase activity//iron ion binding//binding//tetrapyrrole binding//molecular_function//ion binding//metal ion binding//oxidoreductase activity, acting on paired donors, with incorporation or reduction of molecular oxygen//oxidoreductase activity//catalytic activity//heme binding//heterocyclic compound binding//transition metal ion binding//organic cyclic compound binding//cation binding	no KO assigned | (RefSeq) abscisic acid 8'-hydroxylase 3-like	http://www.genome.jp/dbget-bin/www_bget?sot:102590941	CYP722A1	Cytochrome P450, E-class, group I||Cytochrome P450, conserved site||Cytochrome P450
173	PGSC0003DMG400003618	316.047	713.106	-1.174	0.00035694	0.0031441	DOWN	--	--	--	--	--	--	no KO assigned | (RefSeq) uncharacterized LOC102600744	http://www.genome.jp/dbget-bin/www_bget?sot:102600744	-	Oxidoreductase-like, N-terminal
174	PGSC0003DMG400003667	243.404	612.81	-1.3321	0.0001001	0.0010743	DOWN	--	--	--	--	--	--	--	--	--	--
175	PGSC0003DMG400003693	5372.92	14136	-1.3956	0.0004485	0.0037934	DOWN	--	--	--	--	--	--	no KO assigned | (RefSeq) uncharacterized sugar kinase slr0537	http://www.genome.jp/dbget-bin/www_bget?sot:102597600	-	Carbohydrate kinase PfkB||Ribokinase-like
176	PGSC0003DMG400003776	271.205	677.463	-1.3208	6.8611e-05	0.0007787	DOWN	--	--	GO:0031224//GO:0044425//GO:0005575//GO:0016021//GO:0016020	intrinsic component of membrane//membrane part//cellular_component//integral component of membrane//membrane	GO:0005515//GO:0005488//GO:0031072//GO:0051082//GO:0003674	protein binding//binding//heat shock protein binding//unfolded protein binding//molecular_function	no KO assigned | (RefSeq) protein SPA, chloroplastic	http://www.genome.jp/dbget-bin/www_bget?sot:102593418	-	Heat shock protein DnaJ, cysteine-rich domain
177	PGSC0003DMG400003777	2329.75	5301.72	-1.1863	7.4924e-05	0.00083978	DOWN	--	--	--	--	--	--	no KO assigned | (RefSeq) uncharacterized LOC102593744	http://www.genome.jp/dbget-bin/www_bget?sot:102593744	-	Protein of unknown function DUF3119
178	PGSC0003DMG400003814	236.11	709.511	-1.5874	2.8863e-06	4.8536e-05	DOWN	--	--	--	--	--	--	no KO assigned | (RefSeq) LRR receptor-like serine/threonine-protein kinase ERL1	http://www.genome.jp/dbget-bin/www_bget?sot:102579023	-	Leucine-rich repeat domain, L domain-like||Leucine-rich repeat-containing N-terminal, plant-type||Leucine-rich repeat
179	PGSC0003DMG400003897	1133.53	2803.17	-1.3062	0.0071028	0.036277	DOWN	--	--	--	--	GO:0008270//GO:0005488//GO:0003674//GO:0043167//GO:0046872//GO:0046914//GO:0043169	zinc ion binding//binding//molecular_function//ion binding//metal ion binding//transition metal ion binding//cation binding	K10144 RING finger and CHY zinc finger domain-containing protein 1 [EC:2.3.2.27] | (RefSeq) E3 ubiquitin-protein ligase MIEL1	http://www.genome.jp/dbget-bin/www_bget?sot:102582766	-	Zinc finger, CTCHY-type||Zinc finger, CHY-type||Zinc finger, RING-type||Zinc finger, RING/FYVE/PHD-type
180	PGSC0003DMG400003944	132.818	392.861	-1.5646	2.4342e-05	0.00031477	DOWN	GO:0051493//GO:0008150//GO:0065007//GO:0033043//GO:0010562//GO:0060236//GO:0031401//GO:0050789//GO:0007346//GO:0031323//GO:0051246//GO:0007051//GO:0060255//GO:0001934//GO:0070507//GO:0043412//GO:0044267//GO:0043933//GO:0051347//GO:0051247//GO:0050794//GO:0019220//GO:0090224//GO:0019538//GO:0007010//GO:0006996//GO:0044093//GO:0000278//GO:0006796//GO:0007052//GO:0071840//GO:0007049//GO:0080090//GO:…	regulation of cytoskeleton organization//biological_process//biological regulation//regulation of organelle organization//positive regulation of phosphorus metabolic process//regulation of mitotic spindle organization//positive regulation of protein modification process//regulation of biological process//regulation of mitotic cell cycle//regulation of cellular metabolic process//regulation of pro…	GO:0043228//GO:0005856//GO:0005623//GO:0044430//GO:0005819//GO:0005622//GO:0044464//GO:0043226//GO:0043232//GO:0005874//GO:0044424//GO:0005575//GO:0044422//GO:0044446//GO:0043229//GO:0015630//GO:0032991	non-membrane-bounded organelle//cytoskeleton//cell//cytoskeletal part//spindle//intracellular//cell part//organelle//intracellular non-membrane-bounded organelle//microtubule//intracellular part//cellular_component//organelle part//intracellular organelle part//intracellular organelle//microtubule cytoskeleton//protein-containing complex	--	--	no KO assigned | (RefSeq) protein TPX2	http://www.genome.jp/dbget-bin/www_bget?sot:102600111	-	TPX2||TPX2 central domain
181	PGSC0003DMG400003992	6072.38	12641.8	-1.0579	0.00034311	0.0030457	DOWN	--	--	GO:0005737//GO:0044424//GO:0043231//GO:0005575//GO:0043229//GO:0043227//GO:0005623//GO:0044444//GO:0005829//GO:0005634//GO:0005622//GO:0043226//GO:0044464	cytoplasm//intracellular part//intracellular membrane-bounded organelle//cellular_component//intracellular organelle//membrane-bounded organelle//cell//cytoplasmic part//cytosol//nucleus//intracellular//organelle//cell part	--	--	no KO assigned | (RefSeq) probable mediator of RNA polymerase II transcription subunit 26c	http://www.genome.jp/dbget-bin/www_bget?sot:102595451	-	Transcription elongation factor, TFIIS/CRSP70, N-terminal, sub-type||Transcription factor IIS, N-terminal
182	PGSC0003DMG400004022	4115.84	8773.2	-1.0919	0.00027367	0.0025164	DOWN	--	--	--	--	--	--	no KO assigned | (RefSeq) uncharacterized LOC102593621	http://www.genome.jp/dbget-bin/www_bget?sot:102593621	-	Protein of unknown function DUF1685
183	PGSC0003DMG400004133	4.84523	29.633	-2.6126	0.008265	0.040833	DOWN	GO:0006810//GO:0051234//GO:0008150//GO:0051179	transport//establishment of localization//biological_process//localization	GO:0044425//GO:0016020//GO:0016021//GO:0005575//GO:0031224	membrane part//membrane//integral component of membrane//cellular_component//intrinsic component of membrane	GO:0003674//GO:0005215	molecular_function//transporter activity	K14638 solute carrier family 15 (peptide/histidine transporter), member 3/4 | (RefSeq) protein NRT1/ PTR FAMILY 1.2-like	http://www.genome.jp/dbget-bin/www_bget?sot:102580650	-	Proton-dependent oligopeptide transporter family||Major facilitator superfamily domain
184	PGSC0003DMG400004329	337.996	886.984	-1.3919	0.0094712	0.045353	DOWN	GO:0051179//GO:0008150//GO:0051234//GO:0006810	localization//biological_process//establishment of localization//transport	GO:0031224//GO:0016020//GO:0016021//GO:0005575//GO:0044425	intrinsic component of membrane//membrane//integral component of membrane//cellular_component//membrane part	GO:0005215//GO:0003674	transporter activity//molecular_function	K14638 solute carrier family 15 (peptide/histidine transporter), member 3/4 | (RefSeq) protein NRT1/ PTR FAMILY 4.5-like	http://www.genome.jp/dbget-bin/www_bget?sot:102593189	-	Major facilitator superfamily domain||Proton-dependent oligopeptide transporter family
185	PGSC0003DMG400004345	6.29763	59.6276	-3.2431	1.215e-05	0.00017223	DOWN	--	--	--	--	--	--	K16675 palmitoyltransferase ZDHHC9/14/18 [EC:2.3.1.225] | (RefSeq) probable protein S-acyltransferase 7	http://www.genome.jp/dbget-bin/www_bget?sot:102600349	--	--
186	PGSC0003DMG400004444	1194.33	2554.49	-1.0968	0.00034086	0.0030275	DOWN	--	--	--	--	--	--	--	--	-	HAD-like domain||HAD-superfamily hydrolase, subfamily IIA||HAD-superfamily hydrolase, subfamily IIA, hypothetical 3
187	PGSC0003DMG400004458	2.47348	22.4074	-3.1794	0.0076467	0.038432	DOWN	GO:0009768//GO:0015979//GO:0008152//GO:0006950//GO:0044237//GO:0009765//GO:0009416//GO:0009314//GO:0006464//GO:0044260//GO:0009642//GO:0009409//GO:0043170//GO:0071704//GO:0019684//GO:0008150//GO:0009628//GO:0018298//GO:0006091//GO:0043412//GO:0044267//GO:0050896//GO:0019538//GO:0009644//GO:0009645//GO:0009266//GO:0036211//GO:0009987//GO:0044238	photosynthesis, light harvesting in photosystem I//photosynthesis//metabolic process//response to stress//cellular metabolic process//photosynthesis, light harvesting//response to light stimulus//response to radiation//cellular protein modification process//cellular macromolecule metabolic process//response to light intensity//response to cold//macromolecule metabolic process//organic substance m…	GO:0009782//GO:0042651//GO:0044425//GO:0009507//GO:0005737//GO:0044424//GO:0055035//GO:0043231//GO:0005575//GO:0044446//GO:0043229//GO:0016021//GO:0044422//GO:0016020//GO:0009535//GO:0043227//GO:0031984//GO:0044435//GO:0032991//GO:0044434//GO:0009523//GO:0031976//GO:0009522//GO:0098796//GO:0009534//GO:0044436//GO:0044444//GO:0005623//GO:0009536//GO:0009521//GO:0034357//GO:0009579//GO:0005622//GO:…	photosystem I antenna complex//thylakoid membrane//membrane part//chloroplast//cytoplasm//intracellular part//plastid thylakoid membrane//intracellular membrane-bounded organelle//cellular_component//intracellular organelle part//intracellular organelle//integral component of membrane//organelle part//membrane//chloroplast thylakoid membrane//membrane-bounded organelle//organelle subcompartment//…	GO:0005488//GO:0042803//GO:0042802//GO:0046906//GO:0003674//GO:0016168//GO:0031409//GO:0046983//GO:1901363//GO:0005515//GO:0097159	binding//protein homodimerization activity//identical protein binding//tetrapyrrole binding//molecular_function//chlorophyll binding//pigment binding//protein dimerization activity//heterocyclic compound binding//protein binding//organic cyclic compound binding	K08911 light-harvesting complex I chlorophyll a/b binding protein 5 | (RefSeq) chlorophyll a-b binding protein P4, chloroplastic	http://www.genome.jp/dbget-bin/www_bget?sot:102590384	LHCA5	Chlorophyll A-B binding protein||Chlorophyll a/b binding protein domain||Chlorophyll A-B binding protein, plant
188	PGSC0003DMG400004596	1378.77	5858.1	-2.087	0.00088871	0.0067242	DOWN	GO:0009058//GO:0008610//GO:0044238//GO:0009987//GO:0044249//GO:0046460//GO:0008150//GO:0006629//GO:0046486//GO:1901576//GO:0045017//GO:0006638//GO:0006639//GO:0006641//GO:0071704//GO:0046463//GO:0044255//GO:0019432//GO:0044237//GO:0008152	biosynthetic process//lipid biosynthetic process//primary metabolic process//cellular process//cellular biosynthetic process//neutral lipid biosynthetic process//biological_process//lipid metabolic process//glycerolipid metabolic process//organic substance biosynthetic process//glycerolipid biosynthetic process//neutral lipid metabolic process//acylglycerol metabolic process//triglyceride metabol…	GO:0005829//GO:0005622//GO:0044464//GO:0005623//GO:0044444//GO:0005575//GO:0044424//GO:0005737	cytosol//intracellular//cell part//cell//cytoplasmic part//cellular_component//intracellular part//cytoplasm	GO:0016747//GO:0016740//GO:0003824//GO:0003674//GO:0004144//GO:0016411//GO:0016746//GO:0008374	transferase activity, transferring acyl groups other than amino-acyl groups//transferase activity//catalytic activity//molecular_function//diacylglycerol O-acyltransferase activity//acylglycerol O-acyltransferase activity//transferase activity, transferring acyl groups//O-acyltransferase activity	no KO assigned | (RefSeq) uncharacterized LOC102596770	http://www.genome.jp/dbget-bin/www_bget?sot:102596770	-	Thioredoxin-like fold||Armadillo-like helical
189	PGSC0003DMG400004636	1.09034	32.6805	-4.9056	0.0010882	0.0079607	DOWN	GO:0051234//GO:0006810//GO:0008150//GO:0009987//GO:0051179//GO:0055085	establishment of localization//transport//biological_process//cellular process//localization//transmembrane transport	GO:0031224//GO:0044425//GO:0016020//GO:0016021//GO:0005575	intrinsic component of membrane//membrane part//membrane//integral component of membrane//cellular_component	GO:0022857//GO:0005215//GO:0003674	transmembrane transporter activity//transporter activity//molecular_function	no KO assigned | (RefSeq) WAT1-related protein At3g30340-like	http://www.genome.jp/dbget-bin/www_bget?sot:102603735	-	EamA domain||WAT1-related protein
190	PGSC0003DMG400004647	309.074	684	-1.146	0.00069715	0.0054969	DOWN	GO:0008150//GO:0055114//GO:0008152	biological_process//oxidation-reduction process//metabolic process	GO:0031224//GO:0044425//GO:0016021//GO:0005575//GO:0016020	intrinsic component of membrane//membrane part//integral component of membrane//cellular_component//membrane	GO:0016491//GO:0016705//GO:0020037//GO:1901363//GO:0003824//GO:0046914//GO:0043169//GO:0097159//GO:0005506//GO:0005488//GO:0004497//GO:0046906//GO:0003674//GO:0046872//GO:0043167	oxidoreductase activity//oxidoreductase activity, acting on paired donors, with incorporation or reduction of molecular oxygen//heme binding//heterocyclic compound binding//catalytic activity//transition metal ion binding//cation binding//organic cyclic compound binding//iron ion binding//binding//monooxygenase activity//tetrapyrrole binding//molecular_function//metal ion binding//ion binding	no KO assigned | (RefSeq) cytochrome P450 82C2-like	http://www.genome.jp/dbget-bin/www_bget?sot:102594454	-	Cytochrome P450, E-class, group I||Cytochrome P450||Cytochrome P450, E-class, group IV||Cytochrome P450, conserved site
191	PGSC0003DMG400004688	6683.29	14210.6	-1.0883	0.00019061	0.001867	DOWN	GO:0006807//GO:0009058//GO:0009163//GO:0009108//GO:0051186//GO:0006790//GO:0044281//GO:1901362//GO:0046483//GO:0044238//GO:0046500//GO:0042451//GO:0009987//GO:0042398//GO:1901564//GO:0008150//GO:0034641//GO:1901657//GO:1901566//GO:0006556//GO:0044249//GO:0019438//GO:0034654//GO:0006732//GO:0051188//GO:0072521//GO:0009116//GO:0046128//GO:0018130//GO:0042455//GO:1901135//GO:0009119//GO:1901576//GO:…	nitrogen compound metabolic process//biosynthetic process//nucleoside biosynthetic process//coenzyme biosynthetic process//cofactor metabolic process//sulfur compound metabolic process//small molecule metabolic process//organic cyclic compound biosynthetic process//heterocycle metabolic process//primary metabolic process//S-adenosylmethionine metabolic process//purine nucleoside biosynthetic proc…	--	--	GO:0016765//GO:0097159//GO:0004478//GO:0043169//GO:0001882//GO:0016740//GO:0030554//GO:0003824//GO:0001883//GO:0000166//GO:1901363//GO:0003674//GO:0036094//GO:0017076//GO:0043167//GO:1901265//GO:0046872//GO:0097367//GO:0032559//GO:0032549//GO:0032550//GO:0035639//GO:0032555//GO:0005488//GO:0032553//GO:0005524//GO:0043168	transferase activity, transferring alkyl or aryl (other than methyl) groups//organic cyclic compound binding//methionine adenosyltransferase activity//cation binding//nucleoside binding//transferase activity//adenyl nucleotide binding//catalytic activity//purine nucleoside binding//nucleotide binding//heterocyclic compound binding//molecular_function//small molecule binding//purine nucleotide bin…	K00789 S-adenosylmethionine synthetase [EC:2.5.1.6] | (RefSeq) S-adenosylmethionine synthase 2	http://www.genome.jp/dbget-bin/www_bget?sot:102591461	-	S-adenosylmethionine synthetase, central domain||S-adenosylmethionine synthetase, N-terminal||S-adenosylmethionine synthetase superfamily||S-adenosylmethionine synthetase, conserved site||S-adenosylmethionine synthetase||S-adenosylmethionine synthetase, C-terminal
192	PGSC0003DMG400004712	294.555	848.06	-1.5256	0.0003364	0.0030031	DOWN	--	--	--	--	--	--	no KO assigned | (RefSeq) uncharacterized LOC102600818	http://www.genome.jp/dbget-bin/www_bget?sot:102600818	-	Protein of unknown function DUF604
193	PGSC0003DMG400004741	417.765	947.229	-1.181	0.00030325	0.0027417	DOWN	GO:0032502//GO:0007275//GO:0008150//GO:0032501	developmental process//multicellular organism development//biological_process//multicellular organismal process	--	--	--	--	no KO assigned | (RefSeq) YABBY1; protein YABBY 4	http://www.genome.jp/dbget-bin/www_bget?sot:102577797	-	High mobility group box domain||YABBY protein
194	PGSC0003DMG400004752	1175.22	2376.37	-1.0158	0.0010141	0.0075105	DOWN	GO:0009059//GO:0019219//GO:1901576//GO:0044260//GO:2001141//GO:0006725//GO:0019222//GO:0071704//GO:0097659//GO:0043170//GO:0034645//GO:0006351//GO:0044271//GO:1903506//GO:0006139//GO:1901360//GO:0008152//GO:0051252//GO:0044237//GO:0009058//GO:0006807//GO:0010467//GO:1901362//GO:0090304//GO:0080090//GO:0044238//GO:0046483//GO:0009987//GO:0051171//GO:0010468//GO:0032774//GO:2000112//GO:0065007//GO:…	macromolecule biosynthetic process//regulation of nucleobase-containing compound metabolic process//organic substance biosynthetic process//cellular macromolecule metabolic process//regulation of RNA biosynthetic process//cellular aromatic compound metabolic process//regulation of metabolic process//organic substance metabolic process//nucleic acid-templated transcription//macromolecule metabolic…	--	--	--	--	no KO assigned | (RefSeq) scarecrow-like protein 22	http://www.genome.jp/dbget-bin/www_bget?sot:102602862	-	Transcription factor GRAS
195	PGSC0003DMG400004810	1067.46	2532.25	-1.2462	5.484e-05	0.00064147	DOWN	GO:0008150//GO:0044238//GO:0019538//GO:0008152//GO:0006508//GO:0071704//GO:0043170	biological_process//primary metabolic process//protein metabolic process//metabolic process//proteolysis//organic substance metabolic process//macromolecule metabolic process	GO:0009505//GO:0005623//GO:0005618//GO:0044464//GO:0071944//GO:0030312//GO:0005575	plant-type cell wall//cell//cell wall//cell part//cell periphery//external encapsulating structure//cellular_component	GO:0003824//GO:0070011//GO:0070001//GO:0004175//GO:0016787//GO:0003674//GO:0004190//GO:0008233	catalytic activity//peptidase activity, acting on L-amino acid peptides//aspartic-type peptidase activity//endopeptidase activity//hydrolase activity//molecular_function//aspartic-type endopeptidase activity//peptidase activity	no KO assigned | (RefSeq) aspartic proteinase nepenthesin-1	http://www.genome.jp/dbget-bin/www_bget?sot:102598199	-	Aspartic peptidase domain||Xylanase inhibitor, N-terminal||Xylanase inhibitor, C-terminal||Peptidase family A1 domain||Pepsin-like domain, plant||Aspartic peptidase A1 family
196	PGSC0003DMG400004822	395.73	1705.31	-2.1074	5.9472e-09	1.7623e-07	DOWN	GO:0008152//GO:0008150//GO:0055114	metabolic process//biological_process//oxidation-reduction process	--	--	GO:0003674//GO:0003824//GO:0016491	molecular_function//catalytic activity//oxidoreductase activity	no KO assigned | (RefSeq) inositol 2-dehydrogenase/D-chiro-inositol 3-dehydrogenase	http://www.genome.jp/dbget-bin/www_bget?sot:102589144	-	Oxidoreductase, C-terminal||Oxidoreductase, N-terminal||NAD(P)-binding domain
197	PGSC0003DMG400004900	51.7495	121.724	-1.234	0.0098897	0.046891	DOWN	--	--	GO:0031224//GO:0044425//GO:0005575//GO:0016021//GO:0016020	intrinsic component of membrane//membrane part//cellular_component//integral component of membrane//membrane	--	--	no KO assigned | (RefSeq) RING-H2 finger protein ATL60-like	http://www.genome.jp/dbget-bin/www_bget?sot:102585558	-	Zinc finger, RING-type||Zinc finger, RING/FYVE/PHD-type
198	PGSC0003DMG400004911	516.242	1080.71	-1.0659	0.00079881	0.0061594	DOWN	GO:0043170//GO:0071704//GO:0006464//GO:0044260//GO:0044237//GO:0008152//GO:0032446//GO:0036211//GO:0009987//GO:0044238//GO:0019538//GO:0016567//GO:0070647//GO:0043412//GO:0044267//GO:0008150	macromolecule metabolic process//organic substance metabolic process//cellular protein modification process//cellular macromolecule metabolic process//cellular metabolic process//metabolic process//protein modification by small protein conjugation//protein modification process//cellular process//primary metabolic process//protein metabolic process//protein ubiquitination//protein modification by …	--	--	GO:0003674//GO:0019787//GO:0004842//GO:0003824//GO:0016740	molecular_function//ubiquitin-like protein transferase activity//ubiquitin-protein transferase activity//catalytic activity//transferase activity	no KO assigned | (RefSeq) U-box domain-containing protein 30-like	http://www.genome.jp/dbget-bin/www_bget?sot:102584974	-	Armadillo-like helical||U box domain||Zinc finger, RING/FYVE/PHD-type||Armadillo-type fold
199	PGSC0003DMG400004923	5596.31	11592.1	-1.0506	0.00037327	0.0032599	DOWN	GO:0008152//GO:0055114//GO:0008150	metabolic process//oxidation-reduction process//biological_process	GO:0005575//GO:0016021//GO:0016020//GO:0044425//GO:0031224	cellular_component//integral component of membrane//membrane//membrane part//intrinsic component of membrane	GO:0048037//GO:0036094//GO:0003674//GO:0004506//GO:1901265//GO:0043167//GO:0016709//GO:0004497//GO:0005488//GO:0043168//GO:0097159//GO:0050662//GO:0050660//GO:0016705//GO:0016491//GO:0003824//GO:1901363//GO:0000166	cofactor binding//small molecule binding//molecular_function//squalene monooxygenase activity//nucleoside phosphate binding//ion binding//oxidoreductase activity, acting on paired donors, with incorporation or reduction of molecular oxygen, NAD(P)H as one donor, and incorporation of one atom of oxygen//monooxygenase activity//binding//anion binding//organic cyclic compound binding//coenzyme bindi…	K00511 squalene monooxygenase [EC:1.14.14.17] | (RefSeq) squalene epoxidase 3-like	http://www.genome.jp/dbget-bin/www_bget?sot:102585235	-	Squalene epoxidase||FAD/NAD(P)-binding domain
200	PGSC0003DMG400004938	2231.46	4652.72	-1.0601	0.00051787	0.0042642	DOWN	GO:0008150//GO:0044238//GO:0008152//GO:0071704//GO:0005975	biological_process//primary metabolic process//metabolic process//organic substance metabolic process//carbohydrate metabolic process	--	--	GO:0003824//GO:0016740//GO:0016772//GO:0016773//GO:0003674	catalytic activity//transferase activity//transferase activity, transferring phosphorus-containing groups//phosphotransferase activity, alcohol group as acceptor//molecular_function	K00854 xylulokinase [EC:2.7.1.17] | (RefSeq) xylulose kinase-like	http://www.genome.jp/dbget-bin/www_bget?sot:102596800	XK-2	Carbohydrate kinase, FGGY, C-terminal||Carbohydrate kinase, FGGY, N-terminal||Carbohydrate kinase, FGGY
201	PGSC0003DMG400004964	283.471	622.99	-1.136	0.00088105	0.0066782	DOWN	GO:0008150//GO:0043412//GO:0070647//GO:0044267//GO:0016567//GO:0019538//GO:0044238//GO:0009987//GO:0036211//GO:0032446//GO:0008152//GO:0044237//GO:0044260//GO:0006464//GO:0071704//GO:0043170	biological_process//macromolecule modification//protein modification by small protein conjugation or removal//cellular protein metabolic process//protein ubiquitination//protein metabolic process//primary metabolic process//cellular process//protein modification process//protein modification by small protein conjugation//metabolic process//cellular metabolic process//cellular macromolecule metabo…	GO:0031224//GO:0044425//GO:0005575//GO:0016021//GO:0016020	intrinsic component of membrane//membrane part//cellular_component//integral component of membrane//membrane	GO:0016740//GO:0003824//GO:0004842//GO:0043169//GO:0005488//GO:0019787//GO:0003674//GO:0043167//GO:0046872	transferase activity//catalytic activity//ubiquitin-protein transferase activity//cation binding//binding//ubiquitin-like protein transferase activity//molecular_function//ion binding//metal ion binding	no KO assigned | (RefSeq) uncharacterized LOC102594920	http://www.genome.jp/dbget-bin/www_bget?sot:102594920	-	Zinc finger, RING-type||IBR domain||E3 ubiquitin ligase RBR family
202	PGSC0003DMG400005009	546.462	1201.91	-1.1371	0.0004264	0.0036438	DOWN	GO:0006811//GO:1902600//GO:0055085//GO:0006812//GO:0098660//GO:0034220//GO:0015672//GO:0051234//GO:0098662//GO:0006810//GO:0008150//GO:0009987//GO:0098655//GO:0051179	ion transport//proton transmembrane transport//transmembrane transport//cation transport//inorganic ion transmembrane transport//ion transmembrane transport//monovalent inorganic cation transport//establishment of localization//inorganic cation transmembrane transport//transport//biological_process//cellular process//cation transmembrane transport//localization	GO:0044425//GO:0016020//GO:0016021//GO:0005575//GO:0031224	membrane part//membrane//integral component of membrane//cellular_component//intrinsic component of membrane	GO:0015297//GO:0015291//GO:0015298//GO:0015078//GO:0015077//GO:0003674//GO:0008324//GO:0015075//GO:0022890//GO:0022857//GO:0015299//GO:0005215//GO:0022804	antiporter activity//secondary active transmembrane transporter activity//solute:cation antiporter activity//proton transmembrane transporter activity//monovalent inorganic cation transmembrane transporter activity//molecular_function//cation transmembrane transporter activity//ion transmembrane transporter activity//inorganic cation transmembrane transporter activity//transmembrane transporter a…	no KO assigned | (RefSeq) cation/H(+) antiporter 18-like	http://www.genome.jp/dbget-bin/www_bget?sot:102588636	ATCHX18	Rossmann-like alpha/beta/alpha sandwich fold||Cation/H+ exchanger
203	PGSC0003DMG400005037	68.7431	192.316	-1.4842	0.006978	0.035811	DOWN	--	--	--	--	--	--	no KO assigned | (RefSeq) uncharacterized LOC102599565	http://www.genome.jp/dbget-bin/www_bget?sot:102599565	--	--
204	PGSC0003DMG400005111	10385.8	34917	-1.7493	8.5079e-06	0.00012625	DOWN	--	--	GO:0005576//GO:0005575	extracellular region//cellular_component	--	--	K13449 pathogenesis-related protein 1 | (RefSeq) basic form of pathogenesis-related protein 1-like	http://www.genome.jp/dbget-bin/www_bget?sot:102589441	-	Ves allergen||CAP domain||Pathogenesis-related protein 1-like, SCP domain||Allergen V5/Tpx-1-related, conserved site||Cysteine-rich secretory protein, allergen V5/Tpx-1-related
205	PGSC0003DMG400005148	331.577	794.965	-1.2615	0.00012272	0.001282	DOWN	GO:0055114//GO:0008150//GO:0008152	oxidation-reduction process//biological_process//metabolic process	GO:0031224//GO:0005575//GO:0016021//GO:0016020//GO:0044425	intrinsic component of membrane//cellular_component//integral component of membrane//membrane//membrane part	GO:0046914//GO:0097159//GO:0043169//GO:0016705//GO:0016491//GO:0003824//GO:1901363//GO:0020037//GO:0003674//GO:0043167//GO:0046872//GO:0005506//GO:0005488//GO:0046906	transition metal ion binding//organic cyclic compound binding//cation binding//oxidoreductase activity, acting on paired donors, with incorporation or reduction of molecular oxygen//oxidoreductase activity//catalytic activity//heterocyclic compound binding//heme binding//molecular_function//ion binding//metal ion binding//iron ion binding//binding//tetrapyrrole binding	no KO assigned | (RefSeq) cytochrome P450 734A1-like	http://www.genome.jp/dbget-bin/www_bget?sot:102581155	-	Cytochrome P450, E-class, group I||Cytochrome P450
206	PGSC0003DMG400005171	3.94623	56.6072	-3.8424	2.1625e-06	3.714e-05	DOWN	--	--	--	--	--	--	no KO assigned | (RefSeq) putative late blight resistance protein homolog R1A-10	http://www.genome.jp/dbget-bin/www_bget?sot:102602412	-	Leucine-rich repeat domain, L domain-like
207	PGSC0003DMG400005200	877.112	1929.8	-1.1376	0.00022487	0.0021359	DOWN	--	--	--	--	--	--	no KO assigned | (RefSeq) uncharacterized LOC102590209	http://www.genome.jp/dbget-bin/www_bget?sot:102590209	-	Coenzyme Q-binding protein COQ10, START domain||START-like domain
208	PGSC0003DMG400005219	1749.68	4124.49	-1.2371	0.0089737	0.043455	DOWN	--	--	--	--	--	--	--	--	--	--
209	PGSC0003DMG400005262	73.9221	302.819	-2.0344	0.00022452	0.0021356	DOWN	--	--	GO:0044425//GO:0016020//GO:0016021//GO:0005575//GO:0031224	membrane part//membrane//integral component of membrane//cellular_component//intrinsic component of membrane	--	--	no KO assigned | (RefSeq) protein QUIRKY-like	http://www.genome.jp/dbget-bin/www_bget?sot:102594014	-	C2 domain||Phosphoribosyltransferase C-terminal
210	PGSC0003DMG400005358	960.878	2043.81	-1.0888	0.00039318	0.0034048	DOWN	--	--	GO:0031224//GO:0016021//GO:0005575//GO:0016020//GO:0044425	intrinsic component of membrane//integral component of membrane//cellular_component//membrane//membrane part	--	--	no KO assigned | (RefSeq) tetraspanin-6	http://www.genome.jp/dbget-bin/www_bget?sot:102602651	-	Tetraspanin/Peripherin
211	PGSC0003DMG400005464	168.98	438.447	-1.3756	0.0010623	0.0077978	DOWN	--	--	--	--	--	--	no KO assigned | (RefSeq) rhodanese-like domain-containing protein 14, chloroplastic	http://www.genome.jp/dbget-bin/www_bget?sot:102582970	-	Rhodanese-like domain
212	PGSC0003DMG400005473	0.734245	15.1648	-4.3683	0.0078624	0.039312	DOWN	--	--	--	--	--	--	--	--	--	--
213	PGSC0003DMG400005485	78.1001	188.931	-1.2745	0.0032578	0.019439	DOWN	GO:0044237//GO:0008152//GO:0006793//GO:0043170//GO:0071704//GO:0016310//GO:0006464//GO:0044260//GO:0043412//GO:0044267//GO:0008150//GO:0036211//GO:0009987//GO:0006468//GO:0044238//GO:0006796//GO:0019538	cellular metabolic process//metabolic process//phosphorus metabolic process//macromolecule metabolic process//organic substance metabolic process//phosphorylation//cellular protein modification process//cellular macromolecule metabolic process//macromolecule modification//cellular protein metabolic process//biological_process//protein modification process//cellular process//protein phosphorylatio…	GO:0044425//GO:0016020//GO:0016021//GO:0005575//GO:0031224	membrane part//membrane//integral component of membrane//cellular_component//intrinsic component of membrane	GO:0016301//GO:0043168//GO:0005524//GO:0032553//GO:0005488//GO:0032555//GO:0035639//GO:0032550//GO:0032549//GO:0032559//GO:0097367//GO:0043167//GO:1901265//GO:0017076//GO:0036094//GO:0003674//GO:1901363//GO:0000166//GO:0001883//GO:0003824//GO:0030554//GO:0004672//GO:0016772//GO:0016740//GO:0001882//GO:0097159//GO:0016773	kinase activity//anion binding//ATP binding//ribonucleotide binding//binding//purine ribonucleotide binding//purine ribonucleoside triphosphate binding//purine ribonucleoside binding//ribonucleoside binding//adenyl ribonucleotide binding//carbohydrate derivative binding//ion binding//nucleoside phosphate binding//purine nucleotide binding//small molecule binding//molecular_function//heterocyclic …	no KO assigned | (RefSeq) probable LRR receptor-like serine/threonine-protein kinase At3g47570	http://www.genome.jp/dbget-bin/www_bget?sot:102592323	-	Protein kinase-like domain||Protein kinase, ATP binding site||Protein kinase domain||Leucine-rich repeat||Serine/threonine-protein kinase, active site||Leucine-rich repeat domain, L domain-like||Leucine-rich repeat, typical subtype
214	PGSC0003DMG400005537	45.9653	121.697	-1.4047	0.0032381	0.01936	DOWN	--	--	--	--	--	--	--	--	--	--
215	PGSC0003DMG400005560	185.54	522.249	-1.493	1.9557e-05	0.00026059	DOWN	--	--	--	--	GO:0046983//GO:0005515//GO:0005488//GO:0003674	protein dimerization activity//protein binding//binding//molecular_function	--	--	IBH1	Myc-type, basic helix-loop-helix (bHLH) domain
216	PGSC0003DMG400005604	181.74	563.763	-1.6332	1.9073e-05	0.00025541	DOWN	--	--	--	--	--	--	--	--	--	--
217	PGSC0003DMG400005627	1851.67	5975.97	-1.6903	2.375e-08	6.3151e-07	DOWN	GO:0008152//GO:0030163//GO:0043170//GO:0071704//GO:0008150//GO:0009057//GO:0044238//GO:0019538//GO:0009056//GO:1901575	metabolic process//protein catabolic process//macromolecule metabolic process//organic substance metabolic process//biological_process//macromolecule catabolic process//primary metabolic process//protein metabolic process//catabolic process//organic substance catabolic process	--	--	--	--	K06891 ATP-dependent Clp protease adaptor protein ClpS | (RefSeq) ATP-dependent Clp protease adapter protein CLPS1, chloroplastic	http://www.genome.jp/dbget-bin/www_bget?sot:102601216	-	Ribosomal protein L7/L12, C-terminal/adaptor protein ClpS-like||Adaptor protein ClpS, core
218	PGSC0003DMG400005628	707.491	3247.19	-2.1984	0.00068394	0.0054056	DOWN	GO:0044238//GO:0019538//GO:0008150//GO:0071704//GO:0043170//GO:0008152//GO:0006508	primary metabolic process//protein metabolic process//biological_process//organic substance metabolic process//macromolecule metabolic process//metabolic process//proteolysis	--	--	GO:0070011//GO:0070001//GO:0003824//GO:0004190//GO:0008233//GO:0003674//GO:0016787//GO:0004175	peptidase activity, acting on L-amino acid peptides//aspartic-type peptidase activity//catalytic activity//aspartic-type endopeptidase activity//peptidase activity//molecular_function//hydrolase activity//endopeptidase activity	no KO assigned | (RefSeq) protein ASPARTIC PROTEASE IN GUARD CELL 1-like	http://www.genome.jp/dbget-bin/www_bget?sot:102600877	-	Aspartic peptidase A1 family||Xylanase inhibitor, N-terminal||Aspartic peptidase domain||Xylanase inhibitor, C-terminal||CND41-like||Peptidase family A1 domain
219	PGSC0003DMG400005659	2928.57	7526.81	-1.3618	7.2714e-06	0.00011016	DOWN	GO:0008150//GO:0065007//GO:0002682//GO:0034641//GO:0016070//GO:0050789//GO:0045087//GO:0050776//GO:0006952//GO:0023052//GO:0050896//GO:0050794//GO:0009617//GO:0045089//GO:0006807//GO:0006955//GO:0009607//GO:0048584//GO:0010467//GO:0006397//GO:0031347//GO:0090304//GO:0007165//GO:0009987//GO:0031349//GO:0044238//GO:0046483//GO:0006396//GO:0002376//GO:0098542//GO:0009620//GO:0009870//GO:0009605//GO:…	biological_process//biological regulation//regulation of immune system process//cellular nitrogen compound metabolic process//RNA metabolic process//regulation of biological process//innate immune response//regulation of immune response//defense response//signaling//response to stimulus//regulation of cellular process//response to bacterium//positive regulation of innate immune response//nitrogen…	GO:0043228//GO:0005730//GO:0005623//GO:0005622//GO:0005634//GO:0031974//GO:0044464//GO:0043226//GO:0043233//GO:0043232//GO:0031981//GO:0044424//GO:0005575//GO:0043231//GO:0070013//GO:0044422//GO:0044446//GO:0043229//GO:0044428//GO:0043227	non-membrane-bounded organelle//nucleolus//cell//intracellular//nucleus//membrane-enclosed lumen//cell part//organelle//organelle lumen//intracellular non-membrane-bounded organelle//nuclear lumen//intracellular part//cellular_component//intracellular membrane-bounded organelle//intracellular organelle lumen//organelle part//intracellular organelle part//intracellular organelle//nuclear part//mem…	--	--	K12861 pre-mRNA-splicing factor SPF27 | (RefSeq) pre-mRNA-splicing factor SPF27 homolog	http://www.genome.jp/dbget-bin/www_bget?sot:102605698	MOS4	Pre-mRNA-splicing factor SPF27
220	PGSC0003DMG400005760	620.7	2562.41	-2.0455	1.2564e-10	5.0023e-09	DOWN	GO:0098656//GO:0098661//GO:0008150//GO:0051234//GO:0006810//GO:0034486//GO:0051179//GO:0046907//GO:0007034//GO:0016482//GO:0006820//GO:0090414//GO:0009987//GO:0055085//GO:0015698//GO:0051641//GO:0006811//GO:0015689//GO:0051649//GO:0034220//GO:0098660	anion transmembrane transport//inorganic anion transmembrane transport//biological_process//establishment of localization//transport//vacuolar transmembrane transport//localization//intracellular transport//vacuolar transport//cytosolic transport//anion transport//molybdate ion export from vacuole//cellular process//transmembrane transport//inorganic anion transport//cellular localization//ion tr…	GO:0005773//GO:0005623//GO:0044444//GO:0044437//GO:0005622//GO:0043226//GO:0044464//GO:0000325//GO:0031224//GO:0009705//GO:0044424//GO:0044425//GO:0005737//GO:0005774//GO:0043229//GO:0044446//GO:0044422//GO:0016021//GO:0098805//GO:0043231//GO:0005575//GO:0098588//GO:0043227//GO:0031090//GO:0016020	vacuole//cell//cytoplasmic part//vacuolar part//intracellular//organelle//cell part//plant-type vacuole//intrinsic component of membrane//plant-type vacuole membrane//intracellular part//membrane part//cytoplasm//vacuolar membrane//intracellular organelle//intracellular organelle part//organelle part//integral component of membrane//whole membrane//intracellular membrane-bounded organelle//cellul…	GO:0022857//GO:0015103//GO:0015075//GO:0005215//GO:0008509//GO:0015098//GO:0003674	transmembrane transporter activity//inorganic anion transmembrane transporter activity//ion transmembrane transporter activity//transporter activity//anion transmembrane transporter activity//molybdate ion transmembrane transporter activity//molecular_function	no KO assigned | (RefSeq) molybdate transporter 2	http://www.genome.jp/dbget-bin/www_bget?sot:102583581	-	Molybdate transporter 1/2||Molybdate transporter 1, plant
221	PGSC0003DMG400005777	1201.23	2581.39	-1.1036	0.0002421	0.002268	DOWN	GO:0043170//GO:0071704//GO:0016539//GO:0051604//GO:0016485//GO:0008152//GO:0006508//GO:0044238//GO:0010467//GO:0030908//GO:0019538//GO:0008150	macromolecule metabolic process//organic substance metabolic process//intein-mediated protein splicing//protein maturation//protein processing//metabolic process//proteolysis//primary metabolic process//gene expression//protein splicing//protein metabolic process//biological_process	--	--	--	--	no KO assigned | (RefSeq) restin homolog	http://www.genome.jp/dbget-bin/www_bget?sot:102596448	-	Intein N-terminal splicing region||EEIG1/EHBP1 N-terminal domain
222	PGSC0003DMG400005876	11.8963	45.0331	-1.9205	0.008897	0.043156	DOWN	--	--	--	--	--	--	--	--	--	--
223	PGSC0003DMG400005890	356.149	2659.71	-2.9007	5.1037e-06	8.0377e-05	DOWN	GO:0008150//GO:0019684//GO:0009767//GO:0006091//GO:0055114//GO:0009987//GO:0015979//GO:0008152//GO:0044237//GO:0022900	biological_process//photosynthesis, light reaction//photosynthetic electron transport chain//generation of precursor metabolites and energy//oxidation-reduction process//cellular process//photosynthesis//metabolic process//cellular metabolic process//electron transport chain	GO:0009522//GO:0098796//GO:0044444//GO:0005623//GO:0044436//GO:0009521//GO:0009536//GO:0009579//GO:0005622//GO:0034357//GO:0031224//GO:0044464//GO:0043226//GO:0005737//GO:0044425//GO:0009507//GO:0044424//GO:0005575//GO:0043231//GO:0016021//GO:0043229//GO:0016020//GO:0043227//GO:0032991	photosystem I//membrane protein complex//cytoplasmic part//cell//thylakoid part//photosystem//plastid//thylakoid//intracellular//photosynthetic membrane//intrinsic component of membrane//cell part//organelle//cytoplasm//membrane part//chloroplast//intracellular part//cellular_component//intracellular membrane-bounded organelle//integral component of membrane//intracellular organelle//membrane//me…	--	--	K14332 photosystem I subunit PsaO | (RefSeq) photosystem I subunit O	http://www.genome.jp/dbget-bin/www_bget?sot:102602224	PSAO	Photosystem I PsaO
224	PGSC0003DMG400005901	38.3	134.97	-1.8172	0.00022948	0.002173	DOWN	GO:0071704//GO:0043170//GO:0006508//GO:0008152//GO:0019538//GO:0044238//GO:0008150	organic substance metabolic process//macromolecule metabolic process//proteolysis//metabolic process//protein metabolic process//primary metabolic process//biological_process	--	--	GO:0003674//GO:0004190//GO:0008233//GO:0016787//GO:0004175//GO:0070011//GO:0070001//GO:0003824	molecular_function//aspartic-type endopeptidase activity//peptidase activity//hydrolase activity//endopeptidase activity//peptidase activity, acting on L-amino acid peptides//aspartic-type peptidase activity//catalytic activity	no KO assigned | (RefSeq) aspartic proteinase nepenthesin-1	http://www.genome.jp/dbget-bin/www_bget?sot:102579167	-	Aspartic peptidase domain||Xylanase inhibitor, N-terminal||Peptidase family A1 domain||Xylanase inhibitor, C-terminal||Aspartic peptidase A1 family||Pepsin-like domain, plant
225	PGSC0003DMG400005935	1201.87	2940.83	-1.2909	2.3906e-05	0.00031036	DOWN	--	--	--	--	--	--	K09528 DnaJ homolog subfamily C member 8 | (RefSeq) J domain-containing protein spf31-like	http://www.genome.jp/dbget-bin/www_bget?sot:102580682	-	DnaJ domain
226	PGSC0003DMG400005958	371.86	1172.72	-1.657	4.1332e-07	8.5668e-06	DOWN	GO:0030258//GO:0019637//GO:0006796//GO:0046488//GO:0046854//GO:0044238//GO:0009987//GO:0008150//GO:0006629//GO:0046486//GO:0006644//GO:0006650//GO:0044255//GO:0016310//GO:0071704//GO:0006793//GO:0046834//GO:0008152//GO:0044237	lipid modification//organophosphate metabolic process//phosphate-containing compound metabolic process//phosphatidylinositol metabolic process//phosphatidylinositol phosphorylation//primary metabolic process//cellular process//biological_process//lipid metabolic process//glycerolipid metabolic process//phospholipid metabolic process//glycerophospholipid metabolic process//cellular lipid metabolic…	--	--	GO:0016773//GO:0097159//GO:0043169//GO:0001882//GO:0016740//GO:0016772//GO:0030554//GO:0003824//GO:0001883//GO:0000166//GO:1901363//GO:0003674//GO:0036094//GO:0017076//GO:0016307//GO:0043167//GO:1901265//GO:0046872//GO:0097367//GO:0032559//GO:0032549//GO:0032550//GO:0035639//GO:0032555//GO:0005488//GO:0032553//GO:0005524//GO:0043168//GO:0016301	phosphotransferase activity, alcohol group as acceptor//organic cyclic compound binding//cation binding//nucleoside binding//transferase activity//transferase activity, transferring phosphorus-containing groups//adenyl nucleotide binding//catalytic activity//purine nucleoside binding//nucleotide binding//heterocyclic compound binding//molecular_function//small molecule binding//purine nucleotide …	K00921 1-phosphatidylinositol-3-phosphate 5-kinase [EC:2.7.1.150] | (RefSeq) 1-phosphatidylinositol-3-phosphate 5-kinase FAB1B-like	http://www.genome.jp/dbget-bin/www_bget?sot:102587453	-	Zinc finger, FYVE/PHD-type||Phosphatidylinositol-4-phosphate 5-kinase, C-terminal||GroEL-like apical domain||Phosphatidylinositol-4-phosphate 5-kinase, N-terminal domain||Phosphatidylinositol-4-phosphate 5-kinase, core||Zinc finger, FYVE-related||Chaperonin Cpn60/TCP-1 family
227	PGSC0003DMG400006106	1190.46	6418.85	-2.4308	8.2487e-15	6.2507e-13	DOWN	GO:0044238//GO:0019538//GO:0008150//GO:0071704//GO:0043170//GO:0008152//GO:0006508	primary metabolic process//protein metabolic process//biological_process//organic substance metabolic process//macromolecule metabolic process//metabolic process//proteolysis	--	--	GO:0070011//GO:0003824//GO:0017171//GO:0008236//GO:0008233//GO:0003674//GO:0016787	peptidase activity, acting on L-amino acid peptides//catalytic activity//serine hydrolase activity//serine-type peptidase activity//peptidase activity//molecular_function//hydrolase activity	no KO assigned | (RefSeq) acylamino-acid-releasing enzyme-like	http://www.genome.jp/dbget-bin/www_bget?sot:102587454	-	Alpha/Beta hydrolase fold||Peptidase S9, prolyl oligopeptidase, catalytic domain
228	PGSC0003DMG400006180	14.4388	54.3952	-1.9135	0.004893	0.026967	DOWN	GO:0008152//GO:0005975//GO:0071704//GO:0008150//GO:0044238	metabolic process//carbohydrate metabolic process//organic substance metabolic process//biological_process//primary metabolic process	--	--	GO:0016798//GO:0016787//GO:0004553//GO:0003674//GO:0003824	hydrolase activity, acting on glycosyl bonds//hydrolase activity//hydrolase activity, hydrolyzing O-glycosyl compounds//molecular_function//catalytic activity	no KO assigned | (RefSeq) probable endo-1,4-beta-xylanase C	http://www.genome.jp/dbget-bin/www_bget?sot:102591613	-	Glycoside hydrolase superfamily||Glycoside hydrolase family 10 domain
229	PGSC0003DMG400006208	1532.65	4638.71	-1.5977	1.5959e-07	3.6419e-06	DOWN	--	--	GO:0042651//GO:0005737//GO:0009507//GO:0044425//GO:0055035//GO:0044424//GO:0005575//GO:0043231//GO:0044422//GO:0016021//GO:0043229//GO:0044446//GO:0044435//GO:0031984//GO:0043227//GO:0009535//GO:0016020//GO:0032991//GO:0044434//GO:0031976//GO:0005623//GO:0044444//GO:0044436//GO:0009534//GO:0070069//GO:0009512//GO:0009536//GO:0005622//GO:0009579//GO:0034357//GO:0031224//GO:0044464//GO:0043226	thylakoid membrane//cytoplasm//chloroplast//membrane part//plastid thylakoid membrane//intracellular part//cellular_component//intracellular membrane-bounded organelle//organelle part//integral component of membrane//intracellular organelle//intracellular organelle part//plastid part//organelle subcompartment//membrane-bounded organelle//chloroplast thylakoid membrane//membrane//protein-containin…	GO:0005488//GO:0019904//GO:0003674//GO:0005515	binding//protein domain specific binding//molecular_function//protein binding	no KO assigned | (RefSeq) uncharacterized LOC102600718	http://www.genome.jp/dbget-bin/www_bget?sot:102600718	-	PetM of cytochrome b6/f complex subunit 7
230	PGSC0003DMG400006211	136.252	525.46	-1.9473	8.4392e-08	2.0285e-06	DOWN	GO:1901362//GO:0080090//GO:0090304//GO:0009987//GO:0051171//GO:0044238//GO:0046483//GO:0009058//GO:0006807//GO:0010467//GO:0019438//GO:0034654//GO:0060255//GO:0010556//GO:0018130//GO:0050794//GO:0065007//GO:0032774//GO:2000112//GO:0010468//GO:0006355//GO:0008150//GO:0031326//GO:0044249//GO:0031323//GO:0050789//GO:0034641//GO:0009889//GO:0016070//GO:0006725//GO:0019222//GO:0034645//GO:0006351//GO:…	organic cyclic compound biosynthetic process//regulation of primary metabolic process//nucleic acid metabolic process//cellular process//regulation of nitrogen compound metabolic process//primary metabolic process//heterocycle metabolic process//biosynthetic process//nitrogen compound metabolic process//gene expression//aromatic compound biosynthetic process//nucleobase-containing compound biosyn…	--	--	GO:0003700//GO:0003674	DNA-binding transcription factor activity//molecular_function	K14432 ABA responsive element binding factor | (RefSeq) ABSCISIC ACID-INSENSITIVE 5-like protein 4	http://www.genome.jp/dbget-bin/www_bget?sot:102597983	-	Basic-leucine zipper domain
231	PGSC0003DMG400006222	1571.97	3757.42	-1.2572	3.969e-05	0.00048088	DOWN	--	--	GO:0031224//GO:0005575//GO:0016021//GO:0016020//GO:0044425	intrinsic component of membrane//cellular_component//integral component of membrane//membrane//membrane part	--	--	no KO assigned | (RefSeq) transmembrane protein 45A	http://www.genome.jp/dbget-bin/www_bget?sot:102600392	-	Protein of unknown function DUF716 (TMEM45)
232	PGSC0003DMG400006226	2720.2	8043.56	-1.5641	6.6515e-05	0.00075896	DOWN	--	--	--	--	--	--	no KO assigned | (RefSeq) uncharacterized protein At4g06744-like	http://www.genome.jp/dbget-bin/www_bget?sot:102595354	-	Leucine-rich repeat domain, L domain-like
233	PGSC0003DMG400006304	139.771	557.745	-1.9965	1.9612e-08	5.3e-07	DOWN	GO:0008152//GO:0051252//GO:0044237//GO:0044271//GO:0006139//GO:1901360//GO:1903506//GO:0006725//GO:0019222//GO:0043170//GO:0006351//GO:0034645//GO:0071704//GO:0097659//GO:0009059//GO:0019219//GO:2001141//GO:1901576//GO:0044260//GO:0034654//GO:0019438//GO:0010556//GO:0060255//GO:0018130//GO:0050794//GO:0065007//GO:0010468//GO:2000112//GO:0032774//GO:0006355//GO:0031326//GO:0008150//GO:0031323//GO:…	metabolic process//regulation of RNA metabolic process//cellular metabolic process//cellular nitrogen compound biosynthetic process//nucleobase-containing compound metabolic process//organic cyclic compound metabolic process//regulation of nucleic acid-templated transcription//cellular aromatic compound metabolic process//regulation of metabolic process//macromolecule metabolic process//transcrip…	--	--	GO:0005488//GO:0003674//GO:1901363//GO:0003676//GO:0003677//GO:0003690//GO:0097159	binding//molecular_function//heterocyclic compound binding//nucleic acid binding//DNA binding//double-stranded DNA binding//organic cyclic compound binding	no KO assigned | (RefSeq) uncharacterized LOC102581678	http://www.genome.jp/dbget-bin/www_bget?sot:102581678	-	Transcription termination factor, mitochondrial/chloroplastic
234	PGSC0003DMG400006348	485.882	1280.2	-1.3977	1.0413e-05	0.00015003	DOWN	--	--	--	--	--	--	--	--	--	--
235	PGSC0003DMG400006376	92.7525	314.285	-1.7606	5.3946e-06	8.4512e-05	DOWN	--	--	--	--	--	--	--	--	--	--
236	PGSC0003DMG400006416	2450.55	5920.97	-1.2727	2.4272e-05	0.00031401	DOWN	GO:0050794//GO:0050789//GO:0065007//GO:0008150//GO:0019725//GO:0009987//GO:0045454//GO:0042592//GO:0065008	regulation of cellular process//regulation of biological process//biological regulation//biological_process//cellular homeostasis//cellular process//cell redox homeostasis//homeostatic process//regulation of biological quality	GO:0005623//GO:0005575	cell//cellular_component	--	--	no KO assigned | (RefSeq) 5'-adenylylsulfate reductase-like 4	http://www.genome.jp/dbget-bin/www_bget?sot:102582277	-	Thioredoxin domain||Thioredoxin-like fold
237	PGSC0003DMG400006705	1052.98	2320.5	-1.14	0.00022207	0.0021163	DOWN	--	--	--	--	--	--	no KO assigned | (RefSeq) uncharacterized LOC102589266	http://www.genome.jp/dbget-bin/www_bget?sot:102589266	-	BSD domain
238	PGSC0003DMG400006727	64.1238	149.374	-1.22	0.0060625	0.032029	DOWN	GO:0034220//GO:0006811//GO:0055085//GO:0009987//GO:0051179//GO:0051234//GO:0006810//GO:0008150	ion transmembrane transport//ion transport//transmembrane transport//cellular process//localization//establishment of localization//transport//biological_process	GO:0016020//GO:0016021//GO:0005575//GO:0044425//GO:0031224	membrane//integral component of membrane//cellular_component//membrane part//intrinsic component of membrane	GO:0005216//GO:0003674//GO:0015267//GO:0022803//GO:0022838//GO:0005215//GO:0015075//GO:0022857	ion channel activity//molecular_function//channel activity//passive transmembrane transporter activity//substrate-specific channel activity//transporter activity//ion transmembrane transporter activity//transmembrane transporter activity	K05391 cyclic nucleotide gated channel, other eukaryote | (RefSeq) putative cyclic nucleotide-gated ion channel 15	http://www.genome.jp/dbget-bin/www_bget?sot:102597988	-	Cyclic nucleotide-binding domain||RmlC-like jelly roll fold||Ion transport domain||Cyclic nucleotide-binding-like
239	PGSC0003DMG400006838	453.576	1026.6	-1.1785	0.0002512	0.0023436	DOWN	GO:0019538//GO:0044238//GO:0008150//GO:0071704//GO:0043170//GO:0006508//GO:0008152	protein metabolic process//primary metabolic process//biological_process//organic substance metabolic process//macromolecule metabolic process//proteolysis//metabolic process	--	--	GO:0070011//GO:0017171//GO:0003824//GO:0003674//GO:0008233//GO:0008236//GO:0004175//GO:0016787//GO:0004252	peptidase activity, acting on L-amino acid peptides//serine hydrolase activity//catalytic activity//molecular_function//peptidase activity//serine-type peptidase activity//endopeptidase activity//hydrolase activity//serine-type endopeptidase activity	no KO assigned | (RefSeq) subtilisin-like protease SBT1.7	http://www.genome.jp/dbget-bin/www_bget?sot:102601698	-	Peptidase S8, subtilisin, His-active site||Cucumisin-like catalytic domain||Peptidase S8, subtilisin, Ser-active site||Peptidase S8 propeptide/proteinase inhibitor I9||Peptidase S8, subtilisin-related||Peptidase S8/S53 domain
240	PGSC0003DMG400006858	790.757	1615.7	-1.0309	0.00080503	0.006195	DOWN	GO:0009987//GO:0008150//GO:0015979//GO:0008152//GO:0044237	cellular process//biological_process//photosynthesis//metabolic process//cellular metabolic process	--	--	--	--	no KO assigned | (RefSeq) ftrapot; ferredoxin-thioredoxin reductase, variable chain-like	http://www.genome.jp/dbget-bin/www_bget?sot:102583051	-	Ferredoxin thioredoxin reductase, alpha chain||Electron transport accessory protein-like domain
241	PGSC0003DMG400006894	1027.04	2668.43	-1.3775	9.0177e-06	0.00013216	DOWN	--	--	--	--	GO:0003674//GO:0005488//GO:0003723//GO:0097159//GO:0003676//GO:1901363	molecular_function//binding//RNA binding//organic cyclic compound binding//nucleic acid binding//heterocyclic compound binding	no KO assigned | (RefSeq) binding partner of ACD11 1-like	http://www.genome.jp/dbget-bin/www_bget?sot:102605891	-	RNA recognition motif domain
242	PGSC0003DMG400006903	101.747	294.694	-1.5342	7.4457e-05	0.00083612	DOWN	--	--	GO:0031224//GO:0044425//GO:0016020//GO:0005575//GO:0016021	intrinsic component of membrane//membrane part//membrane//cellular_component//integral component of membrane	--	--	no KO assigned | (RefSeq) uncharacterized LOC102583994	http://www.genome.jp/dbget-bin/www_bget?sot:102583994	-	NADH-ubiquinone reductase complex 1 MLRQ subunit
243	PGSC0003DMG400006950	17.3805	87.099	-2.3252	8.0509e-05	0.00089497	DOWN	GO:0008152//GO:0008150	metabolic process//biological_process	--	--	GO:0016758//GO:0016757//GO:0003674//GO:0003824//GO:0016740	transferase activity, transferring hexosyl groups//transferase activity, transferring glycosyl groups//molecular_function//catalytic activity//transferase activity	no KO assigned | (RefSeq) UDP-glycosyltransferase 90A1-like	http://www.genome.jp/dbget-bin/www_bget?sot:102584658	-	UDP-glucuronosyl/UDP-glucosyltransferase
244	PGSC0003DMG400006986	11.5506	67.0736	-2.5378	0.00015764	0.0015866	DOWN	GO:0015979//GO:0008152//GO:0044237//GO:0009987//GO:0055114//GO:0051179//GO:0006091//GO:0051234//GO:0006810//GO:0008150//GO:0019684	photosynthesis//metabolic process//cellular metabolic process//cellular process//oxidation-reduction process//localization//generation of precursor metabolites and energy//establishment of localization//transport//biological_process//photosynthesis, light reaction	GO:0044435//GO:0031984//GO:0016020//GO:0043227//GO:0009535//GO:0005739//GO:0005575//GO:0043231//GO:0044422//GO:0016021//GO:0043229//GO:0044446//GO:0005737//GO:0009507//GO:0044425//GO:0055035//GO:0044424//GO:0042651//GO:0031224//GO:0044464//GO:0043226//GO:0005622//GO:0009579//GO:0034357//GO:0044444//GO:0005623//GO:0009534//GO:0044436//GO:0009536//GO:0044434//GO:0070469//GO:0031976	plastid part//organelle subcompartment//membrane//membrane-bounded organelle//chloroplast thylakoid membrane//mitochondrion//cellular_component//intracellular membrane-bounded organelle//organelle part//integral component of membrane//intracellular organelle//intracellular organelle part//cytoplasm//chloroplast//membrane part//plastid thylakoid membrane//intracellular part//thylakoid membrane//in…	GO:0043167//GO:0051540//GO:0046872//GO:0003674//GO:0048037//GO:0003954//GO:0048038//GO:0016655//GO:0005506//GO:0005488//GO:0043169//GO:0051536//GO:0046914//GO:0050136//GO:0003824//GO:0008137//GO:0016651//GO:0051539//GO:0016491	ion binding//metal cluster binding//metal ion binding//molecular_function//cofactor binding//NADH dehydrogenase activity//quinone binding//oxidoreductase activity, acting on NAD(P)H, quinone or similar compound as acceptor//iron ion binding//binding//cation binding//iron-sulfur cluster binding//transition metal ion binding//NADH dehydrogenase (quinone) activity//catalytic activity//NADH dehydroge…	--	--	PSBG	NADH-ubiquinone oxidoreductase, 20 Kd subunit||NADH:ubiquinone oxidoreductase-like, 20kDa subunit
245	PGSC0003DMG400007035	44.3367	113.614	-1.3576	0.0053149	0.028899	DOWN	--	--	--	--	--	--	no KO assigned | (RefSeq) uncharacterized protein At4g00950-like	http://www.genome.jp/dbget-bin/www_bget?sot:102600669	--	--
246	PGSC0003DMG400007064	3.37532	27.8892	-3.0466	0.0042356	0.024013	DOWN	GO:0065007//GO:0008150//GO:0051179//GO:0010876//GO:0019915//GO:0051235//GO:0033036//GO:0065008	biological regulation//biological_process//localization//lipid localization//lipid storage//maintenance of location//macromolecule localization//regulation of biological quality	GO:0031224//GO:0044425//GO:0016020//GO:0016021//GO:0005575	intrinsic component of membrane//membrane part//membrane//integral component of membrane//cellular_component	--	--	K19365 seipin | (RefSeq) uncharacterized LOC102582863	http://www.genome.jp/dbget-bin/www_bget?sot:102582863	-	Seipin family
247	PGSC0003DMG400007113	356.97	1355.18	-1.9246	1.9082e-06	3.3194e-05	DOWN	GO:0006629//GO:0008150//GO:0055114//GO:0044238//GO:0008152//GO:0071704	lipid metabolic process//biological_process//oxidation-reduction process//primary metabolic process//metabolic process//organic substance metabolic process	--	--	GO:0016491//GO:0080019//GO:0016620//GO:0003824//GO:0016903//GO:0003674	oxidoreductase activity//fatty-acyl-CoA reductase (alcohol-forming) activity//oxidoreductase activity, acting on the aldehyde or oxo group of donors, NAD or NADP as acceptor//catalytic activity//oxidoreductase activity, acting on the aldehyde or oxo group of donors//molecular_function	K13356 alcohol-forming fatty acyl-CoA reductase [EC:1.2.1.84] | (RefSeq) fatty acyl-CoA reductase 3	http://www.genome.jp/dbget-bin/www_bget?sot:102603161	-	Fatty acyl-CoA reductase||NAD(P)-binding domain||Male sterility, NAD-binding||Fatty acyl-CoA reductase, C-terminal
248	PGSC0003DMG400007150	408.3	972.256	-1.2517	0.00011194	0.0011846	DOWN	--	--	GO:0016020//GO:0005575//GO:0016021//GO:0044425//GO:0031224	membrane//cellular_component//integral component of membrane//membrane part//intrinsic component of membrane	--	--	K13680 beta-mannan synthase [EC:2.4.1.32] | (RefSeq) glucomannan 4-beta-mannosyltransferase 2-like	http://www.genome.jp/dbget-bin/www_bget?sot:102598153	-	Glycosyltransferase 2-like||Nucleotide-diphospho-sugar transferases
249	PGSC0003DMG400007195	11064.1	25471.4	-1.203	6.1321e-05	0.00070618	DOWN	--	--	--	--	GO:0097159//GO:0003676//GO:1901363//GO:0003674//GO:0005488	organic cyclic compound binding//nucleic acid binding//heterocyclic compound binding//molecular_function//binding	no KO assigned | (RefSeq) R3H domain-containing protein 2	http://www.genome.jp/dbget-bin/www_bget?sot:102580050	-	SUZ domain||R3H domain
250	PGSC0003DMG400007228	3770.56	7646.45	-1.02	0.00062739	0.0050227	DOWN	--	--	--	--	--	--	no KO assigned | (RefSeq) transcription factor GTE12-like	http://www.genome.jp/dbget-bin/www_bget?sot:102580432	-	Bromodomain
251	PGSC0003DMG400007276	135.229	415.825	-1.6206	0.00017035	0.001695	DOWN	--	--	GO:0016021//GO:0005575//GO:0016020//GO:0044425//GO:0031224	integral component of membrane//cellular_component//membrane//membrane part//intrinsic component of membrane	--	--	no KO assigned | (RefSeq) dnaJ homolog subfamily B member 6	http://www.genome.jp/dbget-bin/www_bget?sot:102591149	-	DnaJ domain
252	PGSC0003DMG400007286	6756.64	18135.2	-1.4244	2.2435e-06	3.8462e-05	DOWN	--	--	--	--	--	--	no KO assigned | (RefSeq) calvin cycle protein CP12-1, chloroplastic	http://www.genome.jp/dbget-bin/www_bget?sot:102594918	-	Domain of unknown function CP12
253	PGSC0003DMG400007295	4797.26	10149.7	-1.0812	0.00020119	0.0019497	DOWN	GO:0009987//GO:0051179//GO:0008150//GO:0006810//GO:0051234//GO:0055085	cellular process//localization//biological_process//transport//establishment of localization//transmembrane transport	GO:0031224//GO:0016020//GO:0005575//GO:0016021//GO:0044425	intrinsic component of membrane//membrane//cellular_component//integral component of membrane//membrane part	GO:0097159//GO:0016462//GO:0017111//GO:0043492//GO:0042626//GO:0005215//GO:0022804//GO:0001883//GO:0030554//GO:0003824//GO:1901363//GO:0016887//GO:0000166//GO:0001882//GO:0022857//GO:1901265//GO:0043167//GO:0097367//GO:0036094//GO:0016818//GO:0003674//GO:0017076//GO:0015399//GO:0005524//GO:0043168//GO:0032553//GO:0015405//GO:0032550//GO:0016787//GO:0032559//GO:0032549//GO:0016817//GO:0032555//GO:…	organic cyclic compound binding//pyrophosphatase activity//nucleoside-triphosphatase activity//ATPase activity, coupled to movement of substances//ATPase activity, coupled to transmembrane movement of substances//transporter activity//active transmembrane transporter activity//purine nucleoside binding//adenyl nucleotide binding//catalytic activity//heterocyclic compound binding//ATPase activity/…	K05658 ATP-binding cassette, subfamily B (MDR/TAP), member 1 [EC:3.6.3.44] | (RefSeq) ABC transporter B family member 11-like	http://www.genome.jp/dbget-bin/www_bget?sot:102590445	-	AAA+ ATPase domain||ABC transporter, conserved site||ABC transporter type 1, transmembrane domain||ABC transporter-like||P-loop containing nucleoside triphosphate hydrolase
254	PGSC0003DMG400007330	3432.64	7241.45	-1.077	0.00028405	0.0025972	DOWN	--	--	--	--	GO:1901363//GO:0003824//GO:0046914//GO:0043169//GO:0097159//GO:0005488//GO:0043168//GO:0003674//GO:0048037//GO:0030170//GO:0046872//GO:0030151//GO:0043167	heterocyclic compound binding//catalytic activity//transition metal ion binding//cation binding//organic cyclic compound binding//binding//anion binding//molecular_function//cofactor binding//pyridoxal phosphate binding//metal ion binding//molybdenum ion binding//ion binding	no KO assigned | (RefSeq) mitochondrial amidoxime reducing component 2-like	http://www.genome.jp/dbget-bin/www_bget?sot:102594413	-	MOSC, N-terminal beta barrel||Pyruvate kinase-like, insert domain||Molybdenum cofactor sulfurase, C-terminal
255	PGSC0003DMG400007362	19.9258	76.367	-1.9383	0.0056028	0.030119	DOWN	GO:0055085//GO:0051234//GO:0006810//GO:0008150//GO:0009987//GO:0051179	transmembrane transport//establishment of localization//transport//biological_process//cellular process//localization	GO:0044425//GO:0016020//GO:0016021//GO:0005575//GO:0031224	membrane part//membrane//integral component of membrane//cellular_component//intrinsic component of membrane	GO:0003674//GO:0022857//GO:0005215	molecular_function//transmembrane transporter activity//transporter activity	no KO assigned | (RefSeq) polyol transporter 5-like	http://www.genome.jp/dbget-bin/www_bget?sot:102603579	-	Sugar/inositol transporter||Sugar transporter, conserved site||Major facilitator superfamily domain||Major facilitator, sugar transporter-like
256	PGSC0003DMG400007464	1335.69	3135.02	-1.2309	6.8078e-05	0.00077383	DOWN	--	--	--	--	--	--	--	--	--	--
257	PGSC0003DMG400007536	5265.72	24150.8	-2.1974	6.9994e-13	4.0475e-11	DOWN	GO:0009987//GO:0008150//GO:0008152//GO:0015979//GO:0044237	cellular process//biological_process//metabolic process//photosynthesis//cellular metabolic process	GO:0009579//GO:0005622//GO:0034357//GO:0031224//GO:0044464//GO:0043226//GO:0098796//GO:0009523//GO:0005623//GO:0044444//GO:0044436//GO:0009521//GO:0009536//GO:0005575//GO:0043231//GO:0016021//GO:0043229//GO:0043227//GO:0016020//GO:0032991//GO:0005737//GO:0044425//GO:0009507//GO:0044424	thylakoid//intracellular//photosynthetic membrane//intrinsic component of membrane//cell part//organelle//membrane protein complex//photosystem II//cell//cytoplasmic part//thylakoid part//photosystem//plastid//cellular_component//intracellular membrane-bounded organelle//integral component of membrane//intracellular organelle//membrane-bounded organelle//membrane//protein-containing complex//cyto…	--	--	K02721 photosystem II PsbW protein | (RefSeq) photosystem II reaction center W protein, chloroplastic	http://www.genome.jp/dbget-bin/www_bget?sot:102581428	-	Photosystem II PsbW, class 2
258	PGSC0003DMG400007556	1012.92	2257.85	-1.1564	0.00017059	0.0016963	DOWN	GO:0008150//GO:0008152	biological_process//metabolic process	--	--	GO:0003824//GO:0003674	catalytic activity//molecular_function	no KO assigned | (RefSeq) acetate/butyrate--CoA ligase AAE7, peroxisomal-like	http://www.genome.jp/dbget-bin/www_bget?sot:102603540	-	AMP-binding enzyme, C-terminal domain||AMP-dependent synthetase/ligase
259	PGSC0003DMG400007571	371.66	2288.66	-2.6224	0.00012495	0.0013016	DOWN	GO:0008150//GO:0009987//GO:0044237//GO:0015979//GO:0008152	biological_process//cellular process//cellular metabolic process//photosynthesis//metabolic process	GO:0009521//GO:0044436//GO:0005623//GO:0009522//GO:0098796//GO:0044464//GO:0034357//GO:0009579//GO:0005622//GO:0044424//GO:0044425//GO:0032991//GO:0009538//GO:0016020//GO:0005575	photosystem//thylakoid part//cell//photosystem I//membrane protein complex//cell part//photosynthetic membrane//thylakoid//intracellular//intracellular part//membrane part//protein-containing complex//photosystem I reaction center//membrane//cellular_component	--	--	no KO assigned | (RefSeq) rop guanine nucleotide exchange factor 12	http://www.genome.jp/dbget-bin/www_bget?sot:102600973	-	Signal peptide, camelysin||Photosystem I PsaH, reaction centre subunit VI
260	PGSC0003DMG400007972	349.483	994.209	-1.5083	5.9976e-06	9.3174e-05	DOWN	GO:0008150//GO:0055114//GO:0008152	biological_process//oxidation-reduction process//metabolic process	GO:0031224//GO:0044425//GO:0016020//GO:0005575//GO:0016021	intrinsic component of membrane//membrane part//membrane//cellular_component//integral component of membrane	GO:0003824//GO:0020037//GO:1901363//GO:0016705//GO:0016491//GO:0097159//GO:0043169//GO:0046914//GO:0046906//GO:0004497//GO:0005488//GO:0005506//GO:0043167//GO:0046872//GO:0003674	catalytic activity//heme binding//heterocyclic compound binding//oxidoreductase activity, acting on paired donors, with incorporation or reduction of molecular oxygen//oxidoreductase activity//organic cyclic compound binding//cation binding//transition metal ion binding//tetrapyrrole binding//monooxygenase activity//binding//iron ion binding//ion binding//metal ion binding//molecular_function	K09843 (+)-abscisic acid 8'-hydroxylase [EC:1.14.13.93] | (RefSeq) ABA 8'-hydroxylase CYP707A2	http://www.genome.jp/dbget-bin/www_bget?sot:102577723	-	Cytochrome P450, E-class, group I||Cytochrome P450, conserved site||Cytochrome P450
261	PGSC0003DMG400008098	3.35469	36.4051	-3.4399	0.0022545	0.014433	DOWN	--	--	--	--	--	--	no KO assigned | (RefSeq) rrp1; kiwellin-like	http://www.genome.jp/dbget-bin/www_bget?sot:102579362	-	RlpA-like protein, double-psi beta-barrel domain
262	PGSC0003DMG400008168	258.084	579.55	-1.1671	0.00063208	0.0050534	DOWN	--	--	--	--	--	--	K15326 tRNA-splicing endonuclease subunit Sen54 | (RefSeq) tRNA-splicing endonuclease subunit Sen54-like	http://www.genome.jp/dbget-bin/www_bget?sot:102592019	-	tRNA-splicing endonuclease, subunit Sen54, N-terminal||tRNA-splicing endonuclease, subunit Sen54
263	PGSC0003DMG400008197	342.84	781.436	-1.1886	0.00026478	0.0024474	DOWN	--	--	--	--	--	--	no KO assigned | (RefSeq) uncharacterized LOC102597557	http://www.genome.jp/dbget-bin/www_bget?sot:102597557	-	Protein of unknown function DUF3511
264	PGSC0003DMG400008269	1080.64	2590.88	-1.2616	3.72e-05	0.00045478	DOWN	--	--	GO:0009941//GO:0044464//GO:0043226//GO:0031975//GO:0005622//GO:0009579//GO:0034357//GO:0009536//GO:0044444//GO:0005623//GO:0009534//GO:0044436//GO:0031967//GO:0031976//GO:0044434//GO:0044435//GO:0031984//GO:0016020//GO:0043227//GO:0009535//GO:0044422//GO:0043229//GO:0044446//GO:0005575//GO:0009526//GO:0043231//GO:0055035//GO:0044424//GO:0005737//GO:0009507//GO:0042651	chloroplast envelope//cell part//organelle//envelope//intracellular//thylakoid//photosynthetic membrane//plastid//cytoplasmic part//cell//chloroplast thylakoid//thylakoid part//organelle envelope//plastid thylakoid//chloroplast part//plastid part//organelle subcompartment//membrane//membrane-bounded organelle//chloroplast thylakoid membrane//organelle part//intracellular organelle//intracellular …	--	--	no KO assigned | (RefSeq) protein TIC 62, chloroplastic	http://www.genome.jp/dbget-bin/www_bget?sot:102605419	-	NAD(P)-binding domain
265	PGSC0003DMG400008287	1444.08	3499.56	-1.277	2.7603e-05	0.0003513	DOWN	GO:0008152//GO:0006807//GO:0008150	metabolic process//nitrogen compound metabolic process//biological_process	--	--	GO:0003674//GO:0016818//GO:0043167//GO:0046872//GO:0016817//GO:0016787//GO:0005488//GO:0003924//GO:0016151//GO:0017111//GO:0046914//GO:0016462//GO:0043169//GO:0003824	molecular_function//hydrolase activity, acting on acid anhydrides, in phosphorus-containing anhydrides//ion binding//metal ion binding//hydrolase activity, acting on acid anhydrides//hydrolase activity//binding//GTPase activity//nickel cation binding//nucleoside-triphosphatase activity//transition metal ion binding//pyrophosphatase activity//cation binding//catalytic activity	K03189 urease accessory protein | (RefSeq) ureG; urease accessory protein G-like	http://www.genome.jp/dbget-bin/www_bget?sot:102586140	UREG	[NiFe]-hydrogenase/urease maturation factor, Ni2-binding GTPase||Urease accessory protein UreG||P-loop containing nucleoside triphosphate hydrolase||CobW/HypB/UreG, nucleotide-binding domain
266	PGSC0003DMG400008297	66.8834	706.729	-3.4014	1.749e-19	2.2795e-17	DOWN	GO:0043170//GO:0071704//GO:0009765//GO:0006464//GO:0044260//GO:0015979//GO:0008152//GO:0044237//GO:0036211//GO:0009987//GO:0044238//GO:0019538//GO:0006091//GO:0044267//GO:0043412//GO:0019684//GO:0008150//GO:0018298	macromolecule metabolic process//organic substance metabolic process//photosynthesis, light harvesting//cellular protein modification process//cellular macromolecule metabolic process//photosynthesis//metabolic process//cellular metabolic process//protein modification process//cellular process//primary metabolic process//protein metabolic process//generation of precursor metabolites and energy//c…	GO:0016020//GO:0043227//GO:0009535//GO:0031984//GO:0044435//GO:0032991//GO:0043231//GO:0005575//GO:0044446//GO:0043229//GO:0016021//GO:0044422//GO:0009507//GO:0044425//GO:0005737//GO:0055035//GO:0044424//GO:0042651//GO:0031224//GO:0043226//GO:0044464//GO:0034357//GO:0005622//GO:0009579//GO:0009534//GO:0044436//GO:0044444//GO:0005623//GO:0009536//GO:0009521//GO:0044434//GO:0031976//GO:0009523//GO:…	membrane//membrane-bounded organelle//chloroplast thylakoid membrane//organelle subcompartment//plastid part//protein-containing complex//intracellular membrane-bounded organelle//cellular_component//intracellular organelle part//intracellular organelle//integral component of membrane//organelle part//chloroplast//membrane part//cytoplasm//plastid thylakoid membrane//intracellular part//thylakoid…	GO:0003674//GO:0016168//GO:0046906//GO:0005488//GO:0097159//GO:1901363	molecular_function//chlorophyll binding//tetrapyrrole binding//binding//organic cyclic compound binding//heterocyclic compound binding	K08912 light-harvesting complex II chlorophyll a/b binding protein 1 | (RefSeq) chlorophyll a-b binding protein 1C, chloroplastic	http://www.genome.jp/dbget-bin/www_bget?sot:102594096	-	Chlorophyll A-B binding protein, plant||Chlorophyll A-B binding protein||Chlorophyll a/b binding protein domain
267	PGSC0003DMG400008301	186.368	534.714	-1.5206	1.5363e-05	0.00021191	DOWN	GO:0018298//GO:0019684//GO:0008150//GO:0044267//GO:0043412//GO:0006091//GO:0019538//GO:0036211//GO:0044238//GO:0009987//GO:0044237//GO:0008152//GO:0015979//GO:0044260//GO:0006464//GO:0009765//GO:0071704//GO:0043170	protein-chromophore linkage//photosynthesis, light reaction//biological_process//cellular protein metabolic process//macromolecule modification//generation of precursor metabolites and energy//protein metabolic process//protein modification process//primary metabolic process//cellular process//cellular metabolic process//metabolic process//photosynthesis//cellular macromolecule metabolic process/…	GO:0031976//GO:0009523//GO:0098796//GO:0009522//GO:0044434//GO:0009536//GO:0009521//GO:0044436//GO:0009534//GO:0005623//GO:0044444//GO:0034357//GO:0005622//GO:0009579//GO:0043226//GO:0044464//GO:0031224//GO:0042651//GO:0055035//GO:0044424//GO:0009507//GO:0044425//GO:0005737//GO:0044446//GO:0043229//GO:0016021//GO:0044422//GO:0043231//GO:0005575//GO:0032991//GO:0043227//GO:0009535//GO:0016020//GO:…	plastid thylakoid//photosystem II//membrane protein complex//photosystem I//chloroplast part//plastid//photosystem//thylakoid part//chloroplast thylakoid//cell//cytoplasmic part//photosynthetic membrane//intracellular//thylakoid//organelle//cell part//intrinsic component of membrane//thylakoid membrane//plastid thylakoid membrane//intracellular part//chloroplast//membrane part//cytoplasm//intrace…	GO:1901363//GO:0097159//GO:0005488//GO:0046906//GO:0016168//GO:0003674	heterocyclic compound binding//organic cyclic compound binding//binding//tetrapyrrole binding//chlorophyll binding//molecular_function	K08912 light-harvesting complex II chlorophyll a/b binding protein 1 | (RefSeq) chlorophyll a-b binding protein 1B, chloroplastic-like	http://www.genome.jp/dbget-bin/www_bget?sot:102596765	-	Chlorophyll a/b binding protein domain||Chlorophyll A-B binding protein||Chlorophyll A-B binding protein, plant
268	PGSC0003DMG400008310	328.595	768.795	-1.2263	0.00018769	0.0018442	DOWN	GO:0044260//GO:1901576//GO:0009059//GO:0097659//GO:0071704//GO:0034645//GO:0006351//GO:0043170//GO:0006725//GO:0044271//GO:1901360//GO:0006139//GO:0044237//GO:0008152//GO:0010467//GO:0009058//GO:0006807//GO:0044238//GO:0046483//GO:0009987//GO:1901362//GO:0090304//GO:0044249//GO:0016070//GO:0034641//GO:0032774//GO:0008150//GO:0018130//GO:0019438//GO:0034654	cellular macromolecule metabolic process//organic substance biosynthetic process//macromolecule biosynthetic process//nucleic acid-templated transcription//organic substance metabolic process//cellular macromolecule biosynthetic process//transcription, DNA-templated//macromolecule metabolic process//cellular aromatic compound metabolic process//cellular nitrogen compound biosynthetic process//org…	--	--	GO:0034062//GO:0016779//GO:0003674//GO:0003899//GO:0016740//GO:0016772//GO:0003824	5'-3' RNA polymerase activity//nucleotidyltransferase activity//molecular_function//DNA-directed 5'-3' RNA polymerase activity//transferase activity//transferase activity, transferring phosphorus-containing groups//catalytic activity	K16253 DNA-directed RNA polymerase IV and V subunit 7 | (RefSeq) DNA-directed RNA polymerase V subunit 7-like	http://www.genome.jp/dbget-bin/www_bget?sot:102590183	-	Nucleic acid-binding, OB-fold||RNA polymerase Rpb7, N-terminal
269	PGSC0003DMG400008313	908.878	2458.5	-1.4356	4.036e-06	6.5502e-05	DOWN	GO:0008150//GO:0009987//GO:0044237//GO:0008152	biological_process//cellular process//cellular metabolic process//metabolic process	--	--	GO:0003824//GO:0003674	catalytic activity//molecular_function	no KO assigned | (RefSeq) uncharacterized protein ycf23-like	http://www.genome.jp/dbget-bin/www_bget?sot:102591437	-	Aldolase-type TIM barrel||Uncharacterised protein family Ycf23||Dihydropteroate synthase-like
270	PGSC0003DMG400008344	197.343	479.536	-1.2809	0.0034296	0.020217	DOWN	GO:0019752//GO:0008150//GO:1901564//GO:0043436//GO:0044238//GO:0009987//GO:0044281//GO:0006082//GO:0055114//GO:0006807//GO:0044237//GO:0008152//GO:0071704//GO:0006520	carboxylic acid metabolic process//biological_process//organonitrogen compound metabolic process//oxoacid metabolic process//primary metabolic process//cellular process//small molecule metabolic process//organic acid metabolic process//oxidation-reduction process//nitrogen compound metabolic process//cellular metabolic process//metabolic process//organic substance metabolic process//cellular amin…	--	--	GO:0003824//GO:0016491//GO:0016638//GO:0016639//GO:0003674	catalytic activity//oxidoreductase activity//oxidoreductase activity, acting on the CH-NH2 group of donors//oxidoreductase activity, acting on the CH-NH2 group of donors, NAD or NADP as acceptor//molecular_function	K00261 glutamate dehydrogenase (NAD(P)+) [EC:1.4.1.3] | (RefSeq) glutamate dehydrogenase A	http://www.genome.jp/dbget-bin/www_bget?sot:102599312	-	Glutamate/phenylalanine/leucine/valine dehydrogenase, C-terminal||NAD(P)-binding domain||Glutamate dehydrogenase||NAD(P) binding domain of glutamate dehydrogenase||Leu/Phe/Val dehydrogenases active site||Glutamate/phenylalanine/leucine/valine dehydrogenase||Glutamate/phenylalanine/leucine/valine dehydrogenase, dimerisation domain
271	PGSC0003DMG400008427	31.6497	93.8799	-1.5686	0.0033045	0.01962	DOWN	--	--	GO:0044425//GO:0005575//GO:0016021//GO:0016020//GO:0031224	membrane part//cellular_component//integral component of membrane//membrane//intrinsic component of membrane	--	--	no KO assigned | (RefSeq) hippocampus abundant transcript-like protein 1	http://www.genome.jp/dbget-bin/www_bget?sot:102586357	--	--
272	PGSC0003DMG400008552	9.70825	195.983	-4.3354	2.075e-05	0.0002744	DOWN	--	--	--	--	--	--	no KO assigned | (RefSeq) uncharacterized LOC102586001	http://www.genome.jp/dbget-bin/www_bget?sot:102586001	-	Zf-FLZ domain
273	PGSC0003DMG400008560	88.0104	405.028	-2.2023	0.0069715	0.035784	DOWN	--	--	--	--	--	--	--	--	--	--
274	PGSC0003DMG400008611	457.843	1186.12	-1.3733	2.0546e-05	0.00027268	DOWN	--	--	--	--	--	--	no KO assigned | (RefSeq) pentatricopeptide repeat-containing protein At3g06430, chloroplastic-like	http://www.genome.jp/dbget-bin/www_bget?sot:102581788	-	Pentatricopeptide repeat
275	PGSC0003DMG400008639	9.08283	38.8359	-2.0962	0.0093947	0.045039	DOWN	GO:0006091//GO:0009767//GO:0019684//GO:0009773//GO:0044238//GO:0044237//GO:0008150//GO:0009987//GO:0055114//GO:0015979//GO:0008152//GO:0071704//GO:0022900//GO:0005975	generation of precursor metabolites and energy//photosynthetic electron transport chain//photosynthesis, light reaction//photosynthetic electron transport in photosystem I//primary metabolic process//cellular metabolic process//biological_process//cellular process//oxidation-reduction process//photosynthesis//metabolic process//organic substance metabolic process//electron transport chain//carboh…	GO:0009534//GO:0010598//GO:0044444//GO:0005623//GO:0044434//GO:0044464//GO:0005622//GO:0044425//GO:0055035//GO:0044424//GO:0042651//GO:0009535//GO:0044435//GO:0043229//GO:0044446//GO:0044422//GO:0044436//GO:0009536//GO:0031976//GO:0098796//GO:0043226//GO:0034357//GO:0009579//GO:0009507//GO:0005737//GO:0016020//GO:0043227//GO:0031984//GO:0032991//GO:0043231//GO:0005575	chloroplast thylakoid//NAD(P)H dehydrogenase complex (plastoquinone)//cytoplasmic part//cell//chloroplast part//cell part//intracellular//membrane part//plastid thylakoid membrane//intracellular part//thylakoid membrane//chloroplast thylakoid membrane//plastid part//intracellular organelle//intracellular organelle part//organelle part//thylakoid part//plastid//plastid thylakoid//membrane protein …	GO:0005488//GO:0003824//GO:0030246//GO:0003674	binding//catalytic activity//carbohydrate binding//molecular_function	no KO assigned | (RefSeq) photosynthetic NDH subunit of subcomplex B 2, chloroplastic	http://www.genome.jp/dbget-bin/www_bget?sot:102593344	NDF2	Galactose mutarotase-like domain||-||Glycoside hydrolase-type carbohydrate-binding
276	PGSC0003DMG400008712	2629.74	7256.83	-1.4644	1.3536e-06	2.455e-05	DOWN	GO:0044271//GO:1901360//GO:0006139//GO:0044237//GO:0009059//GO:0019219//GO:0019222//GO:0043170//GO:0065007//GO:0032774//GO:0010468//GO:0034641//GO:0016070//GO:0034654//GO:0060255//GO:0010556//GO:0018130//GO:0050794//GO:0009058//GO:0006807//GO:0010467//GO:0090304//GO:0046483//GO:0044238//GO:1903506//GO:0008152//GO:0051252//GO:2001141//GO:0044260//GO:1901576//GO:0006725//GO:0006351//GO:0034645//GO:…	cellular nitrogen compound biosynthetic process//organic cyclic compound metabolic process//nucleobase-containing compound metabolic process//cellular metabolic process//macromolecule biosynthetic process//regulation of nucleobase-containing compound metabolic process//regulation of metabolic process//macromolecule metabolic process//biological regulation//RNA biosynthetic process//regulation of …	GO:0044424//GO:0043229//GO:0005623//GO:0005634//GO:0005622//GO:0044464//GO:0043231//GO:0005575//GO:0043227//GO:0043226	intracellular part//intracellular organelle//cell//nucleus//intracellular//cell part//intracellular membrane-bounded organelle//cellular_component//membrane-bounded organelle//organelle	GO:0003674//GO:0003700	molecular_function//DNA-binding transcription factor activity	K14514 ethylene-insensitive protein 3 | (RefSeq) protein ETHYLENE INSENSITIVE 3-like	http://www.genome.jp/dbget-bin/www_bget?sot:102588768	-	Ethylene insensitive 3-like protein, DNA-binding domain
277	PGSC0003DMG400008732	439.593	899.529	-1.033	0.0013089	0.0092414	DOWN	--	--	--	--	--	--	no KO assigned | (RefSeq) uncharacterized LOC102598415	http://www.genome.jp/dbget-bin/www_bget?sot:102598415	--	--
278	PGSC0003DMG400008801	646.029	1501.83	-1.2171	7.8724e-05	0.00087726	DOWN	--	--	--	--	GO:0016818//GO:0036094//GO:0003674//GO:0043167//GO:0016787//GO:0032550//GO:0032555//GO:0035639//GO:0032553//GO:0097159//GO:0016462//GO:0019001//GO:0003824//GO:1901363//GO:0017076//GO:1901265//GO:0097367//GO:0016817//GO:0032549//GO:0005488//GO:0043168//GO:0003924//GO:0017111//GO:0032561//GO:0001882//GO:0001883//GO:0005525//GO:0000166	hydrolase activity, acting on acid anhydrides, in phosphorus-containing anhydrides//small molecule binding//molecular_function//ion binding//hydrolase activity//purine ribonucleoside binding//purine ribonucleotide binding//purine ribonucleoside triphosphate binding//ribonucleotide binding//organic cyclic compound binding//pyrophosphatase activity//guanyl nucleotide binding//catalytic activity//he…	K03242 translation initiation factor 2 subunit 3 | (RefSeq) eukaryotic translation initiation factor 2 subunit gamma-like	http://www.genome.jp/dbget-bin/www_bget?sot:102585342	-	Transcription factor, GTP-binding domain||Translation initiation factor 2, gamma subunit, C-terminal||Translation elongation factor EF1A/initiation factor IF2gamma, C-terminal||Translation protein, beta-barrel domain||P-loop containing nucleoside triphosphate hydrolase||Translation elongation factor EFTu-like, domain 2
279	PGSC0003DMG400008804	8.91239	43.3069	-2.2807	0.0033606	0.01989	DOWN	GO:0009987//GO:0008150//GO:0043412//GO:0044260//GO:0009765//GO:0071704//GO:0008152//GO:0015979//GO:0019538//GO:0044238//GO:0036211//GO:0018298//GO:0019684//GO:0044267//GO:0006091//GO:0006464//GO:0043170//GO:0044237	cellular process//biological_process//macromolecule modification//cellular macromolecule metabolic process//photosynthesis, light harvesting//organic substance metabolic process//metabolic process//photosynthesis//protein metabolic process//primary metabolic process//protein modification process//protein-chromophore linkage//photosynthesis, light reaction//cellular protein metabolic process//gene…	GO:0009579//GO:0034357//GO:0043226//GO:0098796//GO:0031976//GO:0009536//GO:0044436//GO:0005575//GO:0043231//GO:0032991//GO:0031984//GO:0043227//GO:0016020//GO:0005737//GO:0009507//GO:0005622//GO:0044464//GO:0031224//GO:0009522//GO:0009523//GO:0044434//GO:0009521//GO:0005623//GO:0044444//GO:0009534//GO:0016021//GO:0044422//GO:0044446//GO:0043229//GO:0044435//GO:0009535//GO:0042651//GO:0055035//GO:…	thylakoid//photosynthetic membrane//organelle//membrane protein complex//plastid thylakoid//plastid//thylakoid part//cellular_component//intracellular membrane-bounded organelle//protein-containing complex//organelle subcompartment//membrane-bounded organelle//membrane//cytoplasm//chloroplast//intracellular//cell part//intrinsic component of membrane//photosystem I//photosystem II//chloroplast pa…	GO:0097159//GO:1901363//GO:0016168//GO:0003674//GO:0046906//GO:0005488	organic cyclic compound binding//heterocyclic compound binding//chlorophyll binding//molecular_function//tetrapyrrole binding//binding	K08912 light-harvesting complex II chlorophyll a/b binding protein 1 | (RefSeq) chlorophyll a-b binding protein 1C, chloroplastic-like	http://www.genome.jp/dbget-bin/www_bget?sot:102589532	-	Chlorophyll a/b binding protein domain||Chlorophyll A-B binding protein||Chlorophyll A-B binding protein, plant
280	PGSC0003DMG400008848	147.917	435.516	-1.5579	0.00044481	0.0037696	DOWN	--	--	--	--	--	--	no KO assigned | (RefSeq) mis18-binding protein 1-like	http://www.genome.jp/dbget-bin/www_bget?sot:102584463	-	SANT associated
281	PGSC0003DMG400008851	74.475	246.306	-1.7256	2.7105e-05	0.00034615	DOWN	--	--	--	--	--	--	--	--	--	--
282	PGSC0003DMG400008910	0.356097	15.2557	-5.4209	0.0037646	0.021812	DOWN	--	--	--	--	--	--	no KO assigned | (RefSeq) uncharacterized LOC102598990	http://www.genome.jp/dbget-bin/www_bget?sot:102598990	-	Domain of unknown function DUF4378
283	PGSC0003DMG400009026	401.601	1131.73	-1.4947	2.8305e-06	4.7679e-05	DOWN	GO:0034645//GO:0071704//GO:0044262//GO:0044260//GO:1901576//GO:0005975//GO:0044264//GO:0008152//GO:0005978//GO:0009987//GO:0009250//GO:0005982//GO:0005977//GO:0055114//GO:0033692//GO:0015980//GO:0044249//GO:0008150//GO:0016051//GO:0043170//GO:0044042//GO:0006112//GO:0009059//GO:0044237//GO:0006073//GO:0044238//GO:0005976//GO:0019252//GO:0009058//GO:0006091//GO:0000271//GO:0034637	cellular macromolecule biosynthetic process//organic substance metabolic process//cellular carbohydrate metabolic process//cellular macromolecule metabolic process//organic substance biosynthetic process//carbohydrate metabolic process//cellular polysaccharide metabolic process//metabolic process//glycogen biosynthetic process//cellular process//glucan biosynthetic process//starch metabolic proce…	GO:0043227//GO:0009526//GO:0005575//GO:0043231//GO:0005737//GO:0009507//GO:0043226//GO:0031975//GO:0009532//GO:0009536//GO:0009570//GO:0009501//GO:0044435//GO:0044422//GO:0044446//GO:0043229//GO:0044424//GO:0044464//GO:0009941//GO:0005622//GO:0044444//GO:0005623//GO:0031967//GO:0044434	membrane-bounded organelle//plastid envelope//cellular_component//intracellular membrane-bounded organelle//cytoplasm//chloroplast//organelle//envelope//plastid stroma//plastid//chloroplast stroma//amyloplast//plastid part//organelle part//intracellular organelle part//intracellular organelle//intracellular part//cell part//chloroplast envelope//intracellular//cytoplasmic part//cell//organelle en…	GO:0043167//GO:0016779//GO:0003674//GO:0036094//GO:0032553//GO:0005524//GO:0035639//GO:0032555//GO:0032550//GO:0097159//GO:1901363//GO:0003824//GO:0030554//GO:0016740//GO:0097367//GO:0070566//GO:1901265//GO:0017076//GO:0043168//GO:0005488//GO:0032549//GO:0032559//GO:0008878//GO:0000166//GO:0001883//GO:0001882//GO:0016772	ion binding//nucleotidyltransferase activity//molecular_function//small molecule binding//ribonucleotide binding//ATP binding//purine ribonucleoside triphosphate binding//purine ribonucleotide binding//purine ribonucleoside binding//organic cyclic compound binding//heterocyclic compound binding//catalytic activity//adenyl nucleotide binding//transferase activity//carbohydrate derivative binding//…	K00975 glucose-1-phosphate adenylyltransferase [EC:2.7.7.27] | (RefSeq) agpS3; glucose-1-phosphate adenylyltransferase large subunit 3, chloroplastic/amyloplastic-like	http://www.genome.jp/dbget-bin/www_bget?sot:102582750	-	Nucleotide-diphospho-sugar transferases||Trimeric LpxA-like||Nucleotidyl transferase domain||Glucose-1-phosphate adenylyltransferase||ADP-glucose pyrophosphorylase, conserved site
284	PGSC0003DMG400009044	3260.8	6975.16	-1.097	0.00023376	0.0022072	DOWN	GO:0071704//GO:0044260//GO:0051276//GO:0008152//GO:0018205//GO:0009987//GO:0043412//GO:0016569//GO:0008150//GO:0043170//GO:0018022//GO:0006464//GO:0043414//GO:0044237//GO:0006479//GO:0032259//GO:0018193//GO:0016571//GO:0008213//GO:0044238//GO:0006325//GO:0036211//GO:0016043//GO:0034968//GO:0006996//GO:0071840//GO:0019538//GO:0043933//GO:0016570//GO:0044267	organic substance metabolic process//cellular macromolecule metabolic process//chromosome organization//metabolic process//peptidyl-lysine modification//cellular process//macromolecule modification//covalent chromatin modification//biological_process//macromolecule metabolic process//peptidyl-lysine methylation//cellular protein modification process//macromolecule methylation//cellular metabolic …	GO:0032991//GO:0043227//GO:0005575//GO:0043231//GO:0043226//GO:0044428//GO:0044422//GO:0044446//GO:0043229//GO:0044424//GO:0031519//GO:0044464//GO:0005622//GO:0005634//GO:0005623	protein-containing complex//membrane-bounded organelle//cellular_component//intracellular membrane-bounded organelle//organelle//nuclear part//organelle part//intracellular organelle part//intracellular organelle//intracellular part//PcG protein complex//cell part//intracellular//nucleus//cell	GO:0008170//GO:0008168//GO:0003674//GO:0016279//GO:0016741//GO:0003824//GO:0018024//GO:0016740//GO:0008276//GO:0016278//GO:0042054//GO:0008757	N-methyltransferase activity//methyltransferase activity//molecular_function//protein-lysine N-methyltransferase activity//transferase activity, transferring one-carbon groups//catalytic activity//histone-lysine N-methyltransferase activity//transferase activity//protein methyltransferase activity//lysine N-methyltransferase activity//histone methyltransferase activity//S-adenosylmethionine-depen…	K11430 histone-lysine N-methyltransferase EZH2 [EC:2.1.1.43] | (RefSeq) histone-lysine N-methyltransferase EZA1	http://www.genome.jp/dbget-bin/www_bget?sot:102598283	-	Tesmin/TSO1-like CXC domain||Histone-lysine N-methyltransferase, EZ||SET domain||CXC domain||CRC domain
285	PGSC0003DMG400009061	736.577	1612.16	-1.1301	0.00029005	0.0026408	DOWN	GO:0008152//GO:0009084//GO:0006520//GO:1901576//GO:0009064//GO:1901605//GO:0071704//GO:1901564//GO:0008150//GO:0044249//GO:1901566//GO:0044283//GO:0008652//GO:0006082//GO:0044281//GO:0009987//GO:0016053//GO:0044237//GO:0046394//GO:1901607//GO:0006525//GO:0019752//GO:0006526//GO:0009058//GO:0006807//GO:0044238//GO:0043436	metabolic process//glutamine family amino acid biosynthetic process//cellular amino acid metabolic process//organic substance biosynthetic process//glutamine family amino acid metabolic process//alpha-amino acid metabolic process//organic substance metabolic process//organonitrogen compound metabolic process//biological_process//cellular biosynthetic process//organonitrogen compound biosynthetic …	GO:0005737//GO:0005575//GO:0044424//GO:0005623//GO:0005622//GO:0044464	cytoplasm//cellular_component//intracellular part//cell//intracellular//cell part	GO:0016746//GO:0003674//GO:0008080//GO:0016740//GO:0016747//GO:0003824//GO:0004042//GO:0016407//GO:0016410	transferase activity, transferring acyl groups//molecular_function//N-acetyltransferase activity//transferase activity//transferase activity, transferring acyl groups other than amino-acyl groups//catalytic activity//acetyl-CoA:L-glutamate N-acetyltransferase activity//acetyltransferase activity//N-acyltransferase activity	K14682 amino-acid N-acetyltransferase [EC:2.3.1.1] | (RefSeq) probable amino-acid acetyltransferase NAGS1, chloroplastic	http://www.genome.jp/dbget-bin/www_bget?sot:102598178	-	GNAT domain||Acyl-CoA N-acyltransferase||Aspartate/glutamate/uridylate kinase||N-acetylglutamate synthase, kinase-like domain||Amino-acid N-acetyltransferase
286	PGSC0003DMG400009086	280.229	718.475	-1.3583	6.6895e-05	0.00076242	DOWN	--	--	--	--	--	--	no KO assigned | (RefSeq) protein IQ-DOMAIN 1	http://www.genome.jp/dbget-bin/www_bget?sot:102600586	-	Domain of unknown function DUF4005||IQ motif, EF-hand binding site
287	PGSC0003DMG400009197	1086.26	2274.29	-1.066	0.00048178	0.0040269	DOWN	--	--	--	--	GO:0003674//GO:0008289//GO:0005488	molecular_function//lipid binding//binding	no KO assigned | (RefSeq) uncharacterized LOC102599661	http://www.genome.jp/dbget-bin/www_bget?sot:102599661	-	START domain||START-like domain
288	PGSC0003DMG400009296	280.412	915.822	-1.7075	2.5208e-07	5.4998e-06	DOWN	--	--	--	--	--	--	no KO assigned | (RefSeq) uncharacterized LOC102592815	http://www.genome.jp/dbget-bin/www_bget?sot:102592815	--	--
289	PGSC0003DMG400009317	4573.79	12631.4	-1.4656	7.2779e-07	1.4111e-05	DOWN	GO:0044238//GO:0044237//GO:0016310//GO:0008150//GO:0009987//GO:0006796//GO:0008152//GO:0006793//GO:0071704//GO:0005975	primary metabolic process//cellular metabolic process//phosphorylation//biological_process//cellular process//phosphate-containing compound metabolic process//metabolic process//phosphorus metabolic process//organic substance metabolic process//carbohydrate metabolic process	--	--	GO:0000166//GO:0001883//GO:0016772//GO:0001882//GO:0016773//GO:0043168//GO:0005488//GO:0032559//GO:0032549//GO:0097367//GO:1901265//GO:0017076//GO:1901363//GO:0008974//GO:0030554//GO:0003824//GO:0016740//GO:0097159//GO:0016301//GO:0005524//GO:0032553//GO:0032555//GO:0035639//GO:0032550//GO:0043167//GO:0036094//GO:0003674	nucleotide binding//purine nucleoside binding//transferase activity, transferring phosphorus-containing groups//nucleoside binding//phosphotransferase activity, alcohol group as acceptor//anion binding//binding//adenyl ribonucleotide binding//ribonucleoside binding//carbohydrate derivative binding//nucleoside phosphate binding//purine nucleotide binding//heterocyclic compound binding//phosphoribu…	K00855 phosphoribulokinase [EC:2.7.1.19] | (RefSeq) phosphoribulokinase, chloroplastic	http://www.genome.jp/dbget-bin/www_bget?sot:102591470	PRK	Phosphoribulokinase/uridine kinase||P-loop containing nucleoside triphosphate hydrolase||Phosphoribulokinase
290	PGSC0003DMG400009351	153.98	322.528	-1.0667	0.0035657	0.020879	DOWN	GO:0006352//GO:0019438//GO:0044249//GO:0008150//GO:0009987//GO:1901362//GO:0008152//GO:0071704//GO:0097659//GO:0034645//GO:0006351//GO:0006725//GO:1901576//GO:0044260//GO:0018130//GO:0034654//GO:0016070//GO:0006366//GO:0034641//GO:0032774//GO:0044238//GO:0046483//GO:0090304//GO:0010467//GO:0006807//GO:0009058//GO:0044237//GO:0006139//GO:1901360//GO:0044271//GO:0006367//GO:0043170//GO:0009059	DNA-templated transcription, initiation//aromatic compound biosynthetic process//cellular biosynthetic process//biological_process//cellular process//organic cyclic compound biosynthetic process//metabolic process//organic substance metabolic process//nucleic acid-templated transcription//cellular macromolecule biosynthetic process//transcription, DNA-templated//cellular aromatic compound metabol…	GO:0005667//GO:0043226//GO:0061695//GO:0044451//GO:0016591//GO:1902494//GO:0030880//GO:0043233//GO:1990234//GO:0032991//GO:0043227//GO:0070013//GO:0005575//GO:0043231//GO:0090575//GO:0005623//GO:0055029//GO:0044464//GO:0044798//GO:0031974//GO:0000428//GO:0005622//GO:0005669//GO:0005634//GO:0044424//GO:0031981//GO:0044428//GO:0044422//GO:0044446//GO:0005654//GO:0043229	transcription factor complex//organelle//transferase complex, transferring phosphorus-containing groups//nucleoplasm part//DNA-directed RNA polymerase II, holoenzyme//catalytic complex//RNA polymerase complex//organelle lumen//transferase complex//protein-containing complex//membrane-bounded organelle//intracellular organelle lumen//cellular_component//intracellular membrane-bounded organelle//RN…	--	--	K03132 transcription initiation factor TFIID subunit 7 | (RefSeq) transcription initiation factor TFIID subunit 7-like	http://www.genome.jp/dbget-bin/www_bget?sot:102594176	-	TAFII55 protein, conserved region
291	PGSC0003DMG400009365	745.765	2571.29	-1.7857	0.0011187	0.0081319	DOWN	--	--	--	--	--	--	no KO assigned | (RefSeq) AT-hook motif nuclear-localized protein 17	http://www.genome.jp/dbget-bin/www_bget?sot:102582555	-	PPC domain
292	PGSC0003DMG400009382	137.25	329.402	-1.263	0.00078872	0.0060915	DOWN	GO:0043170//GO:0022414//GO:0032501//GO:0019222//GO:0051254//GO:0009314//GO:0010150//GO:0009648//GO:0048518//GO:0019219//GO:0009059//GO:0045893//GO:0009888//GO:0009416//GO:0051173//GO:0044237//GO:0045935//GO:0009893//GO:1901360//GO:0006139//GO:0010260//GO:0051301//GO:0044271//GO:0048856//GO:0048513//GO:0046483//GO:0044238//GO:0007275//GO:0008356//GO:0090304//GO:0040034//GO:0010467//GO:0010228//GO:…	macromolecule metabolic process//reproductive process//multicellular organismal process//regulation of metabolic process//positive regulation of RNA metabolic process//response to radiation//leaf senescence//photoperiodism//positive regulation of biological process//regulation of nucleobase-containing compound metabolic process//macromolecule biosynthetic process//positive regulation of transcrip…	GO:0043229//GO:0044424//GO:0044464//GO:0005622//GO:0005634//GO:0005623//GO:0043227//GO:0005575//GO:0043231//GO:0043226	intracellular organelle//intracellular part//cell part//intracellular//nucleus//cell//membrane-bounded organelle//cellular_component//intracellular membrane-bounded organelle//organelle	GO:0005488//GO:0003700//GO:0003674//GO:0097159//GO:0003676//GO:1901363	binding//DNA-binding transcription factor activity//molecular_function//organic cyclic compound binding//nucleic acid binding//heterocyclic compound binding	no KO assigned | (RefSeq) zinc finger protein NUTCRACKER	http://www.genome.jp/dbget-bin/www_bget?sot:102588795	-	Zinc finger C2H2-type
293	PGSC0003DMG400009420	30.093	122.566	-2.0261	8.4636e-05	0.00093181	DOWN	--	--	GO:0005575//GO:0016020//GO:0016021//GO:0044425//GO:0031224	cellular_component//membrane//integral component of membrane//membrane part//intrinsic component of membrane	--	--	no KO assigned | (RefSeq) RING-H2 finger protein ATL73-like	http://www.genome.jp/dbget-bin/www_bget?sot:102605947	-	Zinc finger, RING/FYVE/PHD-type||Zinc finger, RING-type
294	PGSC0003DMG400009430	2535.23	7977.86	-1.6539	4.142e-08	1.045e-06	DOWN	GO:0006145//GO:1901360//GO:0006139//GO:0010135//GO:0044237//GO:0046113//GO:0010136//GO:0034641//GO:0072521//GO:1901361//GO:0006807//GO:1901575//GO:0043603//GO:0046483//GO:0044238//GO:0006144//GO:0008152//GO:1901565//GO:0072523//GO:0019439//GO:0046700//GO:0055086//GO:0006725//GO:0071704//GO:1901564//GO:0008150//GO:0044270//GO:0009112//GO:0009056//GO:0044248//GO:0044281//GO:0009987	purine nucleobase catabolic process//organic cyclic compound metabolic process//nucleobase-containing compound metabolic process//ureide metabolic process//cellular metabolic process//nucleobase catabolic process//ureide catabolic process//cellular nitrogen compound metabolic process//purine-containing compound metabolic process//organic cyclic compound catabolic process//nitrogen compound metabo…	GO:0044424//GO:0043229//GO:0005623//GO:0044444//GO:0005622//GO:0012505//GO:0044464//GO:0005737//GO:0043231//GO:0005575//GO:0043227//GO:0005783//GO:0043226	intracellular part//intracellular organelle//cell//cytoplasmic part//intracellular//endomembrane system//cell part//cytoplasm//intracellular membrane-bounded organelle//cellular_component//membrane-bounded organelle//endoplasmic reticulum//organelle	GO:0047652//GO:0016813//GO:0016787//GO:0003674//GO:0016810//GO:0003824	allantoate deiminase activity//hydrolase activity, acting on carbon-nitrogen (but not peptide) bonds, in linear amidines//hydrolase activity//molecular_function//hydrolase activity, acting on carbon-nitrogen (but not peptide) bonds//catalytic activity	K02083 allantoate deiminase [EC:3.5.3.9] | (RefSeq) allantoate deiminase	http://www.genome.jp/dbget-bin/www_bget?sot:102578297	ATAAH	Peptidase M20||Amidase, carbamoylase-type||Peptidase M20, dimerisation domain
295	PGSC0003DMG400009461	3410.02	7108.19	-1.0597	0.00043834	0.0037245	DOWN	--	--	--	--	--	--	no KO assigned | (RefSeq) uncharacterized LOC102590911	http://www.genome.jp/dbget-bin/www_bget?sot:102590911	-	Zinc finger, RING-type, conserved site||Zinc finger, RING-type||Zinc finger, RING/FYVE/PHD-type
296	PGSC0003DMG400009571	1625.46	5290.9	-1.7027	2.8922e-08	7.5755e-07	DOWN	GO:0044237//GO:0006464//GO:0016310//GO:0043170//GO:0044267//GO:0019538//GO:0006468//GO:0044238//GO:0036211//GO:0006793//GO:0008152//GO:0044260//GO:0071704//GO:0008150//GO:0043412//GO:0006796//GO:0009987	cellular metabolic process//cellular protein modification process//phosphorylation//macromolecule metabolic process//cellular protein metabolic process//protein metabolic process//protein phosphorylation//primary metabolic process//protein modification process//phosphorus metabolic process//metabolic process//cellular macromolecule metabolic process//organic substance metabolic process//biologica…	--	--	GO:0032549//GO:0032559//GO:0005488//GO:0043168//GO:0017076//GO:1901265//GO:0097367//GO:0001882//GO:0016772//GO:0004672//GO:0001883//GO:0000166//GO:0016773//GO:0032550//GO:0035639//GO:0032555//GO:0032553//GO:0005524//GO:0016301//GO:0003674//GO:0036094//GO:0043167//GO:0016740//GO:0003824//GO:0030554//GO:1901363//GO:0097159	ribonucleoside binding//adenyl ribonucleotide binding//binding//anion binding//purine nucleotide binding//nucleoside phosphate binding//carbohydrate derivative binding//nucleoside binding//transferase activity, transferring phosphorus-containing groups//protein kinase activity//purine nucleoside binding//nucleotide binding//phosphotransferase activity, alcohol group as acceptor//purine ribonucleo…	K04733 interleukin-1 receptor-associated kinase 4 [EC:2.7.11.1] | (RefSeq) inactive protein kinase SELMODRAFT_444075-like	http://www.genome.jp/dbget-bin/www_bget?sot:102589755	-	Rossmann-like alpha/beta/alpha sandwich fold||Protein kinase domain||Protein kinase-like domain||Tyrosine-protein kinase, active site||Serine-threonine/tyrosine-protein kinase, catalytic domain
297	PGSC0003DMG400009771	331.129	742.247	-1.1645	0.00051051	0.0042173	DOWN	--	--	--	--	--	--	--	--	--	--
298	PGSC0003DMG400009773	1257.35	2670.26	-1.0866	0.00065113	0.0051793	DOWN	GO:0023052//GO:0019438//GO:0050789//GO:0044249//GO:0031323//GO:0009889//GO:2000112//GO:0042221//GO:0031326//GO:0008150//GO:0006355//GO:0009987//GO:0051171//GO:1901362//GO:0080090//GO:0008152//GO:0051252//GO:1903506//GO:0009733//GO:0071704//GO:0097659//GO:0034645//GO:0006351//GO:0006725//GO:0071310//GO:1901576//GO:0009755//GO:0044260//GO:2001141//GO:0050794//GO:0018130//GO:0050896//GO:0010556//GO:…	signaling//aromatic compound biosynthetic process//regulation of biological process//cellular biosynthetic process//regulation of cellular metabolic process//regulation of biosynthetic process//regulation of cellular macromolecule biosynthetic process//response to chemical//regulation of cellular biosynthetic process//biological_process//regulation of transcription, DNA-templated//cellular proces…	GO:0043226//GO:0043227//GO:0043231//GO:0005575//GO:0005623//GO:0044464//GO:0005634//GO:0005622//GO:0044424//GO:0043229	organelle//membrane-bounded organelle//intracellular membrane-bounded organelle//cellular_component//cell//cell part//nucleus//intracellular//intracellular part//intracellular organelle	GO:1901363//GO:0003676//GO:0097159//GO:0003674//GO:0003677//GO:0005488	heterocyclic compound binding//nucleic acid binding//organic cyclic compound binding//molecular_function//DNA binding//binding	no KO assigned | (RefSeq) ARF1; auxin response factor 19-like	http://www.genome.jp/dbget-bin/www_bget?sot:102592438	-	PB1 domain||DNA-binding pseudobarrel domain||B3 DNA binding domain||AUX/IAA domain||Auxin response factor
299	PGSC0003DMG400009902	806.989	1730.57	-1.1006	0.00039873	0.0034442	DOWN	--	--	--	--	--	--	no KO assigned | (RefSeq) putative F-box protein At1g65770	http://www.genome.jp/dbget-bin/www_bget?sot:102595285	-	Domain unknown function DUF295||F-box domain
300	PGSC0003DMG400009909	975.549	2008.05	-1.0415	0.00080775	0.0062111	DOWN	GO:0008152//GO:0051252//GO:1903506//GO:0006351//GO:0034645//GO:0071704//GO:0097659//GO:0006725//GO:2001141//GO:1901576//GO:0044260//GO:0019438//GO:0031323//GO:0044249//GO:0050789//GO:0009889//GO:2000112//GO:0006355//GO:0031326//GO:0008150//GO:0051171//GO:0009987//GO:1901362//GO:0080090//GO:0044237//GO:0044271//GO:0006139//GO:1901360//GO:0043170//GO:0019222//GO:0009059//GO:0019219//GO:0018130//GO:…	metabolic process//regulation of RNA metabolic process//regulation of nucleic acid-templated transcription//transcription, DNA-templated//cellular macromolecule biosynthetic process//organic substance metabolic process//nucleic acid-templated transcription//cellular aromatic compound metabolic process//regulation of RNA biosynthetic process//organic substance biosynthetic process//cellular macrom…	GO:0043227//GO:0043231//GO:0005575//GO:0043226//GO:0044424//GO:0043229//GO:0005623//GO:0044464//GO:0005634//GO:0005622	membrane-bounded organelle//intracellular membrane-bounded organelle//cellular_component//organelle//intracellular part//intracellular organelle//cell//cell part//nucleus//intracellular	GO:0003674//GO:1901363//GO:0003676//GO:0097159//GO:0005488//GO:0003677	molecular_function//heterocyclic compound binding//nucleic acid binding//organic cyclic compound binding//binding//DNA binding	no KO assigned | (RefSeq) protein NLP4	http://www.genome.jp/dbget-bin/www_bget?sot:102599232	-	RWP-RK domain||PB1 domain||Protein NLP, PB1 domain||GAF domain-like
301	PGSC0003DMG400009928	591.076	1933.15	-1.7095	7.485e-08	1.8182e-06	DOWN	GO:0050794//GO:0019685//GO:0050896//GO:0065007//GO:0048523//GO:0009628//GO:0031324//GO:0044238//GO:0010110//GO:0009266//GO:0070887//GO:0080153//GO:0071454//GO:0009408//GO:0009058//GO:0051716//GO:0044237//GO:0006950//GO:0009892//GO:0034605//GO:0043255//GO:0015977//GO:0010109//GO:0034059//GO:0019222//GO:0036294//GO:0019253//GO:0009890//GO:0031323//GO:0050789//GO:0070482//GO:0009889//GO:0045912//GO:…	regulation of cellular process//photosynthesis, dark reaction//response to stimulus//biological regulation//negative regulation of cellular process//response to abiotic stimulus//negative regulation of cellular metabolic process//primary metabolic process//regulation of photosynthesis, dark reaction//response to temperature stimulus//cellular response to chemical stimulus//negative regulation of …	GO:0044444//GO:0005623//GO:0044464//GO:0005622//GO:0044424//GO:0043229//GO:0009536//GO:0043226//GO:0009507//GO:0005737//GO:0032991//GO:0043227//GO:0043231//GO:0005575	cytoplasmic part//cell//cell part//intracellular//intracellular part//intracellular organelle//plastid//organelle//chloroplast//cytoplasm//protein-containing complex//membrane-bounded organelle//intracellular membrane-bounded organelle//cellular_component	--	--	no KO assigned | (RefSeq) calvin cycle protein CP12-3, chloroplastic	http://www.genome.jp/dbget-bin/www_bget?sot:102589731	CP12-3	Domain of unknown function CP12
302	PGSC0003DMG400009931	262.34	1405.95	-2.422	0.0090962	0.043919	DOWN	--	--	--	--	--	--	no KO assigned | (RefSeq) uncharacterized LOC102590953	http://www.genome.jp/dbget-bin/www_bget?sot:102590953	-	Protein of unknown function DUF597
303	PGSC0003DMG400009957	283.318	699.489	-1.3039	0.00010932	0.0011607	DOWN	--	--	--	--	--	--	no KO assigned | (RefSeq) F-box/kelch-repeat protein At3g23880-like	http://www.genome.jp/dbget-bin/www_bget?sot:102582817	-	F-box associated interaction domain||F-box domain
304	PGSC0003DMG400010083	174.095	361.455	-1.0539	0.0032931	0.019579	DOWN	--	--	--	--	--	--	no KO assigned | (RefSeq) uncharacterized LOC102604994	http://www.genome.jp/dbget-bin/www_bget?sot:102604994	--	--
305	PGSC0003DMG400010100	1482.07	3318.96	-1.1631	0.00011886	0.0012472	DOWN	--	--	--	--	--	--	K14545 ribosomal RNA-processing protein 7 | (RefSeq) uncharacterized protein PF11_0207-like	http://www.genome.jp/dbget-bin/www_bget?sot:102589922	-	Ribosomal RNA-processing protein 7
306	PGSC0003DMG400010117	1221.57	2634.75	-1.1089	0.0051205	0.028001	DOWN	--	--	--	--	GO:0016747//GO:0016740//GO:0003824//GO:0016746//GO:0003674	transferase activity, transferring acyl groups other than amino-acyl groups//transferase activity//catalytic activity//transferase activity, transferring acyl groups//molecular_function	K19747 BAHD acyltransferase [EC:2.3.1.-] | (RefSeq) BAHD acyltransferase DCR	http://www.genome.jp/dbget-bin/www_bget?sot:102581988	EMB3009	Transferase
307	PGSC0003DMG400010172	253.129	594.642	-1.2322	0.00033486	0.0029902	DOWN	--	--	--	--	--	--	--	--	--	--
308	PGSC0003DMG400010205	9.53923	154.524	-4.0178	0.00092028	0.0069262	DOWN	--	--	--	--	--	--	no KO assigned | (RefSeq) uncharacterized LOC102602677	http://www.genome.jp/dbget-bin/www_bget?sot:102602677	-	Protein of unknown function DUF538
309	PGSC0003DMG400010232	118.648	355.167	-1.5818	2.7123e-05	0.00034623	DOWN	GO:0043170//GO:0019538//GO:0044238//GO:0006508//GO:0008152//GO:0071704//GO:0008150	macromolecule metabolic process//protein metabolic process//primary metabolic process//proteolysis//metabolic process//organic substance metabolic process//biological_process	--	--	GO:0008233//GO:0016787//GO:0003674//GO:0008234//GO:0003824//GO:0070011	peptidase activity//hydrolase activity//molecular_function//cysteine-type peptidase activity//catalytic activity//peptidase activity, acting on L-amino acid peptides	no KO assigned | (RefSeq) zingipain-2-like	http://www.genome.jp/dbget-bin/www_bget?sot:102601679	-	Cysteine peptidase, cysteine active site||Cysteine peptidase, histidine active site||Peptidase C1A||Cathepsin propeptide inhibitor domain (I29)||Peptidase C1A, papain C-terminal||Granulin
310	PGSC0003DMG400010340	377.101	777.106	-1.0432	0.0014526	0.010096	DOWN	GO:0044260//GO:0071704//GO:0006725//GO:0016071//GO:0008152//GO:0006396//GO:0009987//GO:0008150//GO:0031124//GO:0043170//GO:0006139//GO:1901360//GO:0044237//GO:0006397//GO:0010467//GO:0006807//GO:0046483//GO:0044238//GO:0090304//GO:0034641//GO:0016070//GO:0031123	cellular macromolecule metabolic process//organic substance metabolic process//cellular aromatic compound metabolic process//mRNA metabolic process//metabolic process//RNA processing//cellular process//biological_process//mRNA 3'-end processing//macromolecule metabolic process//nucleobase-containing compound metabolic process//organic cyclic compound metabolic process//cellular metabolic process/…	--	--	GO:0003674//GO:0097159//GO:1901363//GO:0003676//GO:0005488//GO:0003723	molecular_function//organic cyclic compound binding//heterocyclic compound binding//nucleic acid binding//binding//RNA binding	K14407 cleavage stimulation factor subunit 2 | (RefSeq) cleavage stimulating factor 64-like	http://www.genome.jp/dbget-bin/www_bget?sot:102583587	CSTF64	Cleavage stimulation factor subunit 2, hinge domain||RNA recognition motif domain||Transcription termination and cleavage factor, C-terminal domain
311	PGSC0003DMG400010404	204.87	444.663	-1.118	0.0014737	0.010221	DOWN	GO:0032259//GO:0008152//GO:0008150	methylation//metabolic process//biological_process	--	--	GO:0016741//GO:0008168//GO:0003674//GO:0016740//GO:0003824	transferase activity, transferring one-carbon groups//methyltransferase activity//molecular_function//transferase activity//catalytic activity	no KO assigned | (RefSeq) uncharacterized LOC102590456	http://www.genome.jp/dbget-bin/www_bget?sot:102590456	-	S-adenosyl-L-methionine-dependent methyltransferase||Methyltransferase type 11
312	PGSC0003DMG400010415	358.592	889.27	-1.3103	5.794e-05	0.00067482	DOWN	GO:0006629//GO:0044238//GO:0009058//GO:0008150//GO:0008610//GO:0055114//GO:0008152//GO:0071704//GO:1901576	lipid metabolic process//primary metabolic process//biosynthetic process//biological_process//lipid biosynthetic process//oxidation-reduction process//metabolic process//organic substance metabolic process//organic substance biosynthetic process	GO:0031224//GO:0044425//GO:0016021//GO:0016020//GO:0005575	intrinsic component of membrane//membrane part//integral component of membrane//membrane//cellular_component	GO:0043169//GO:0046914//GO:0005488//GO:0046872//GO:0003824//GO:0016491//GO:0005506//GO:0043167//GO:0003674	cation binding//transition metal ion binding//binding//metal ion binding//catalytic activity//oxidoreductase activity//iron ion binding//ion binding//molecular_function	K00227 Delta7-sterol 5-desaturase [EC:1.14.19.20] | (RefSeq) delta(7)-sterol-C5(6)-desaturase-like	http://www.genome.jp/dbget-bin/www_bget?sot:102602151	-	Fatty acid hydroxylase
313	PGSC0003DMG400010438	560.947	1159.14	-1.0471	0.001022	0.0075543	DOWN	GO:0008150//GO:0055114//GO:0008152	biological_process//oxidation-reduction process//metabolic process	--	--	GO:0016491//GO:0030554//GO:0003824//GO:1901363//GO:0032542//GO:0097159//GO:0032550//GO:0032555//GO:0035639//GO:0005524//GO:0032553//GO:0036094//GO:0003674//GO:0043167//GO:0001882//GO:0001883//GO:0000166//GO:0016209//GO:0032559//GO:0032549//GO:0005488//GO:0043168//GO:0017076//GO:0016667//GO:1901265//GO:0097367	oxidoreductase activity//adenyl nucleotide binding//catalytic activity//heterocyclic compound binding//sulfiredoxin activity//organic cyclic compound binding//purine ribonucleoside binding//purine ribonucleotide binding//purine ribonucleoside triphosphate binding//ATP binding//ribonucleotide binding//small molecule binding//molecular_function//ion binding//nucleoside binding//purine nucleoside bi…	K12260 sulfiredoxin [EC:1.8.98.2] | (RefSeq) sulfiredoxin, chloroplastic/mitochondrial	http://www.genome.jp/dbget-bin/www_bget?sot:102592429	ATSRX	Sulfiredoxin||ParB/Sulfiredoxin
314	PGSC0003DMG400010521	1603.04	3934.59	-1.2954	1.7473e-05	0.00023685	DOWN	--	--	GO:0009536//GO:0043226//GO:0005737//GO:0009507//GO:0043227//GO:0016020//GO:0005575//GO:0043231//GO:0005623//GO:0044444//GO:0044464//GO:0031224//GO:0005622//GO:0044424//GO:0044425//GO:0016021//GO:0043229	plastid//organelle//cytoplasm//chloroplast//membrane-bounded organelle//membrane//cellular_component//intracellular membrane-bounded organelle//cell//cytoplasmic part//cell part//intrinsic component of membrane//intracellular//intracellular part//membrane part//integral component of membrane//intracellular organelle	--	--	no KO assigned | (RefSeq) uncharacterized LOC102606317	http://www.genome.jp/dbget-bin/www_bget?sot:102606317	-	Protein of unknown function DUF2358
315	PGSC0003DMG400010674	2809.99	8041.43	-1.5169	3.988e-07	8.3228e-06	DOWN	--	--	--	--	--	--	no KO assigned | (RefSeq) putative glutamine amidotransferase YLR126C	http://www.genome.jp/dbget-bin/www_bget?sot:102585501	-	Glutamine amidotransferase||Class I glutamine amidotransferase-like
316	PGSC0003DMG400010801	164.039	355.255	-1.1148	0.0017466	0.011718	DOWN	--	--	--	--	--	--	no KO assigned | (RefSeq) uncharacterized LOC102597799	http://www.genome.jp/dbget-bin/www_bget?sot:102597799	--	--
317	PGSC0003DMG400010855	385.904	1183.84	-1.6172	4.5698e-07	9.3663e-06	DOWN	GO:0008150//GO:0050789//GO:0031323//GO:0043086//GO:0051246//GO:0023052//GO:0043412//GO:0006796//GO:0048519//GO:0080090//GO:0009987//GO:0035304//GO:0006793//GO:0008152//GO:0050790//GO:0010921//GO:0031399//GO:0009966//GO:0044092//GO:0044260//GO:0048583//GO:0071704//GO:0065007//GO:0060255//GO:0050794//GO:0050896//GO:0044267//GO:0043666//GO:0019538//GO:0019220//GO:0016311//GO:0007165//GO:0065009//GO:…	biological_process//regulation of biological process//regulation of cellular metabolic process//negative regulation of catalytic activity//regulation of protein metabolic process//signaling//macromolecule modification//phosphate-containing compound metabolic process//negative regulation of biological process//regulation of primary metabolic process//cellular process//regulation of protein dephosp…	GO:0005575//GO:0016020//GO:0031224//GO:0044425//GO:0016021	cellular_component//membrane//intrinsic component of membrane//membrane part//integral component of membrane	GO:0019212//GO:0019888//GO:0004864//GO:0030234//GO:0003674//GO:0019208//GO:0098772//GO:0004857	phosphatase inhibitor activity//protein phosphatase regulator activity//protein phosphatase inhibitor activity//enzyme regulator activity//molecular_function//phosphatase regulator activity//molecular function regulator//enzyme inhibitor activity	K16833 protein phosphatase inhibitor 2 | (RefSeq) protein GLC8	http://www.genome.jp/dbget-bin/www_bget?sot:102605772	-	Protein phosphatase inhibitor 2 (IPP-2)
318	PGSC0003DMG400010893	1049.8	2487.25	-1.2444	5.3867e-05	0.00063158	DOWN	--	--	GO:0016021//GO:0044425//GO:0031224//GO:0016020//GO:0005575	integral component of membrane//membrane part//intrinsic component of membrane//membrane//cellular_component	--	--	K08504 blocked early in transport 1 | (RefSeq) bet1-like SNARE 1-1	http://www.genome.jp/dbget-bin/www_bget?sot:102581060	-	Target SNARE coiled-coil homology domain
319	PGSC0003DMG400010901	992.548	2363.29	-1.2516	4.975e-05	0.0005891	DOWN	--	--	--	--	--	--	no KO assigned | (RefSeq) RPM1-interacting protein 4-like	http://www.genome.jp/dbget-bin/www_bget?sot:102602287	-	RIN4, pathogenic type III effector avirulence factor Avr cleavage site
320	PGSC0003DMG400010973	232.447	465.054	-1.0005	0.0042345	0.024011	DOWN	--	--	GO:0009536//GO:0043226//GO:0009507//GO:0005737//GO:0043227//GO:0043231//GO:0005575//GO:0044444//GO:0005623//GO:0044464//GO:0005622//GO:0044424//GO:0043229	plastid//organelle//chloroplast//cytoplasm//membrane-bounded organelle//intracellular membrane-bounded organelle//cellular_component//cytoplasmic part//cell//cell part//intracellular//intracellular part//intracellular organelle	--	--	K07253 phenylpyruvate tautomerase [EC:5.3.2.1] | (RefSeq) macrophage migration inhibitory factor homolog	http://www.genome.jp/dbget-bin/www_bget?sot:102582498	-	Macrophage migration inhibitory factor||Tautomerase/MIF superfamily
321	PGSC0003DMG400011141	56.4934	234.886	-2.0558	2.1606e-05	0.00028446	DOWN	GO:0071704//GO:0008152//GO:0006508//GO:0008150//GO:0043170//GO:0044238//GO:0019538	organic substance metabolic process//metabolic process//proteolysis//biological_process//macromolecule metabolic process//primary metabolic process//protein metabolic process	GO:0016020//GO:0005575//GO:0016021//GO:0044425//GO:0031224	membrane//cellular_component//integral component of membrane//membrane part//intrinsic component of membrane	GO:0008236//GO:0004185//GO:0003674//GO:0016787//GO:0004180//GO:0070011//GO:0003824//GO:0017171//GO:0008233//GO:0070008//GO:0008238	serine-type peptidase activity//serine-type carboxypeptidase activity//molecular_function//hydrolase activity//carboxypeptidase activity//peptidase activity, acting on L-amino acid peptides//catalytic activity//serine hydrolase activity//peptidase activity//serine-type exopeptidase activity//exopeptidase activity	K16297 serine carboxypeptidase-like clade II [EC:3.4.16.-] | (RefSeq) serine carboxypeptidase 24	http://www.genome.jp/dbget-bin/www_bget?sot:102585126	-	Peptidase S10, serine carboxypeptidase||Serine carboxypeptidases, histidine active site||Serine carboxypeptidase, serine active site||Alpha/Beta hydrolase fold
322	PGSC0003DMG400011160	202.888	1469.23	-2.8563	8.3963e-07	1.6111e-05	DOWN	GO:0043412//GO:0008150//GO:0009987//GO:0006796//GO:0008152//GO:0006793//GO:0071704//GO:0044260//GO:0044267//GO:0036211//GO:0044238//GO:0006468//GO:0019538//GO:0044237//GO:0043170//GO:0016310//GO:0006464	macromolecule modification//biological_process//cellular process//phosphate-containing compound metabolic process//metabolic process//phosphorus metabolic process//organic substance metabolic process//cellular macromolecule metabolic process//cellular protein metabolic process//protein modification process//primary metabolic process//protein phosphorylation//protein metabolic process//cellular me…	GO:0016020//GO:0005575//GO:0031224//GO:0044425//GO:0016021	membrane//cellular_component//intrinsic component of membrane//membrane part//integral component of membrane	GO:1901363//GO:0003824//GO:0030554//GO:0016740//GO:0097159//GO:0016301//GO:0005524//GO:0032553//GO:0032555//GO:0035639//GO:0032550//GO:0043167//GO:0036094//GO:0003674//GO:0000166//GO:0001883//GO:0004672//GO:0016772//GO:0001882//GO:0004674//GO:0016773//GO:0043168//GO:0005488//GO:0032549//GO:0032559//GO:0097367//GO:1901265//GO:0017076	heterocyclic compound binding//catalytic activity//adenyl nucleotide binding//transferase activity//organic cyclic compound binding//kinase activity//ATP binding//ribonucleotide binding//purine ribonucleotide binding//purine ribonucleoside triphosphate binding//purine ribonucleoside binding//ion binding//small molecule binding//molecular_function//nucleotide binding//purine nucleoside binding//pr…	no KO assigned | (RefSeq) probable LRR receptor-like serine/threonine-protein kinase At4g30520	http://www.genome.jp/dbget-bin/www_bget?sot:102584901	-	Protein kinase domain||Protein kinase, ATP binding site||Leucine-rich repeat-containing N-terminal, plant-type||Leucine-rich repeat||Leucine-rich repeat domain, L domain-like||Serine/threonine-protein kinase, active site||Protein kinase-like domain
323	PGSC0003DMG400011213	650.435	1406.72	-1.1129	0.00034413	0.0030503	DOWN	--	--	--	--	--	--	K03255 protein TIF31 | (RefSeq) protein TSS	http://www.genome.jp/dbget-bin/www_bget?sot:102597930	-	Winged helix-turn-helix DNA-binding domain
324	PGSC0003DMG400011214	38.6645	97.5672	-1.3354	0.0092887	0.044603	DOWN	--	--	GO:0016021//GO:0044425//GO:0031224//GO:0016020//GO:0005575	integral component of membrane//membrane part//intrinsic component of membrane//membrane//cellular_component	--	--	--	--	--	--
325	PGSC0003DMG400011216	81.3205	274.584	-1.7556	1.8853e-05	0.00025313	DOWN	--	--	--	--	--	--	K20456 oxysterol-binding protein 1 | (RefSeq) oxysterol-binding protein-related protein 1B-like	http://www.genome.jp/dbget-bin/www_bget?sot:102596294	-	PH domain-like||Oxysterol-binding protein||Pleckstrin homology domain
326	PGSC0003DMG400011247	81.0168	176.62	-1.1244	0.0083287	0.041064	DOWN	GO:0008150//GO:0051234//GO:0006810//GO:0098655//GO:0009987//GO:0034220//GO:0051179//GO:0006811//GO:0006812//GO:0055085	biological_process//establishment of localization//transport//cation transmembrane transport//cellular process//ion transmembrane transport//localization//ion transport//cation transport//transmembrane transport	GO:0016020//GO:0005575//GO:0031224//GO:0044425//GO:0016021	membrane//cellular_component//intrinsic component of membrane//membrane part//integral component of membrane	GO:0022857//GO:0003674//GO:0015075//GO:0008324//GO:0005215	transmembrane transporter activity//molecular_function//ion transmembrane transporter activity//cation transmembrane transporter activity//transporter activity	no KO assigned | (RefSeq) metal tolerance protein 9-like	http://www.genome.jp/dbget-bin/www_bget?sot:102589902	-	Cation efflux protein, cytoplasmic domain||Cation efflux protein
327	PGSC0003DMG400011269	60.699	235.995	-1.959	3.9082e-06	6.3636e-05	DOWN	--	--	--	--	--	--	no KO assigned | (RefSeq) protein IQ-DOMAIN 14-like	http://www.genome.jp/dbget-bin/www_bget?sot:102603867	-	Domain of unknown function DUF4005
328	PGSC0003DMG400011277	54.2482	139.652	-1.3642	0.010107	0.047701	DOWN	GO:0016043//GO:0022607//GO:0071840//GO:0043933//GO:0044085//GO:0065003//GO:0034622//GO:0010258//GO:0009987//GO:0010257//GO:0008150//GO:0070271	cellular component organization//cellular component assembly//cellular component organization or biogenesis//protein-containing complex subunit organization//cellular component biogenesis//protein-containing complex assembly//cellular protein-containing complex assembly//NADH dehydrogenase complex (plastoquinone) assembly//cellular process//NADH dehydrogenase complex assembly//biological_process/…	GO:0044464//GO:0005622//GO:0005623//GO:0044444//GO:0044434//GO:0044435//GO:0043229//GO:0044446//GO:0044422//GO:0044424//GO:0043226//GO:0009532//GO:0009536//GO:0009570//GO:0043227//GO:0043231//GO:0005575//GO:0009507//GO:0005737	cell part//intracellular//cell//cytoplasmic part//chloroplast part//plastid part//intracellular organelle//intracellular organelle part//organelle part//intracellular part//organelle//plastid stroma//plastid//chloroplast stroma//membrane-bounded organelle//intracellular membrane-bounded organelle//cellular_component//chloroplast//cytoplasm	--	--	no KO assigned | (RefSeq) uncharacterized LOC102591571	http://www.genome.jp/dbget-bin/www_bget?sot:102591571	--	--
329	PGSC0003DMG400011295	473.175	1181.12	-1.3197	0.0091276	0.044035	DOWN	GO:0022900//GO:0097305//GO:0015979//GO:0008152//GO:0055114//GO:0009987//GO:0008150//GO:0042221//GO:0001101//GO:0033993//GO:0010033//GO:0009725//GO:0009719//GO:0044237//GO:0009737//GO:1901700//GO:0019684//GO:0009767//GO:0009773//GO:0006091//GO:0050896	electron transport chain//response to alcohol//photosynthesis//metabolic process//oxidation-reduction process//cellular process//biological_process//response to chemical//response to acid chemical//response to lipid//response to organic substance//response to hormone//response to endogenous stimulus//cellular metabolic process//response to abscisic acid//response to oxygen-containing compound//ph…	GO:0000229//GO:0043231//GO:0009526//GO:0005575//GO:0032991//GO:0016020//GO:0043227//GO:0031984//GO:0009507//GO:0005737//GO:0042646//GO:0034357//GO:0009579//GO:0043226//GO:0031975//GO:0009532//GO:0031976//GO:0098796//GO:0009536//GO:0044436//GO:0043229//GO:0044446//GO:0044422//GO:0016021//GO:0005694//GO:0009535//GO:0044435//GO:0009295//GO:0043232//GO:0030093//GO:0042651//GO:0044424//GO:0055035//GO:…	cytoplasmic chromosome//intracellular membrane-bounded organelle//plastid envelope//cellular_component//protein-containing complex//membrane//membrane-bounded organelle//organelle subcompartment//chloroplast//cytoplasm//plastid nucleoid//photosynthetic membrane//thylakoid//organelle//envelope//plastid stroma//plastid thylakoid//membrane protein complex//plastid//thylakoid part//intracellular orga…	GO:0003674//GO:0019904//GO:0005488//GO:0005515	molecular_function//protein domain specific binding//binding//protein binding	no KO assigned | (RefSeq) protein CURVATURE THYLAKOID 1B, chloroplastic	http://www.genome.jp/dbget-bin/www_bget?sot:102602283	PTAC8	Cyanobacterial aminoacyl-tRNA synthetase, CAAD domain||Protein CURVATURE THYLAKOID 1
330	PGSC0003DMG400011331	775.403	1744.23	-1.1696	0.00015477	0.0015609	DOWN	GO:0009987//GO:0008150//GO:0007017	cellular process//biological_process//microtubule-based process	GO:0043226//GO:0044430//GO:0005856//GO:0015630//GO:0032991//GO:0005575//GO:1902494//GO:0044464//GO:0005622//GO:0005623//GO:0043228//GO:0005875//GO:0030286//GO:0044422//GO:0043229//GO:0044446//GO:0044424//GO:0043232	organelle//cytoskeletal part//cytoskeleton//microtubule cytoskeleton//protein-containing complex//cellular_component//catalytic complex//cell part//intracellular//cell//non-membrane-bounded organelle//microtubule associated complex//dynein complex//organelle part//intracellular organelle//intracellular organelle part//intracellular part//intracellular non-membrane-bounded organelle	--	--	K10418 dynein light chain LC8-type | (RefSeq) dynein light chain 2, cytoplasmic	http://www.genome.jp/dbget-bin/www_bget?sot:102587230	-	Dynein light chain, type 1/2||Dynein light chain, type 1/2, conserved site
331	PGSC0003DMG400011340	101.789	234.829	-1.206	0.0024032	0.015157	DOWN	--	--	GO:0031224//GO:0016021//GO:0044425//GO:0005575//GO:0016020	intrinsic component of membrane//integral component of membrane//membrane part//cellular_component//membrane	--	--	K09518 DnaJ homolog subfamily B member 12 | (RefSeq) chaperone protein dnaJ 49-like	http://www.genome.jp/dbget-bin/www_bget?sot:102583358	-	DnaJ domain||Domain of unknown function DUF1977, DnaJ-like
332	PGSC0003DMG400011358	182.357	437.633	-1.263	0.00033653	0.0030034	DOWN	--	--	GO:0005623//GO:0044444//GO:0010598//GO:0009534//GO:0044434//GO:0031224//GO:0044464//GO:0005622//GO:0044425//GO:0044424//GO:0055035//GO:0042651//GO:0044435//GO:0009535//GO:0016021//GO:0044422//GO:0044446//GO:0043229//GO:0044436//GO:0009536//GO:0098796//GO:0031976//GO:0043226//GO:0009579//GO:0034357//GO:0005737//GO:0009507//GO:0031984//GO:0043227//GO:0016020//GO:0032991//GO:0005575//GO:0043231	cell//cytoplasmic part//NAD(P)H dehydrogenase complex (plastoquinone)//chloroplast thylakoid//chloroplast part//intrinsic component of membrane//cell part//intracellular//membrane part//intracellular part//plastid thylakoid membrane//thylakoid membrane//plastid part//chloroplast thylakoid membrane//integral component of membrane//organelle part//intracellular organelle part//intracellular organel…	--	--	no KO assigned | (RefSeq) NAD(P)H-quinone oxidoreductase subunit T, chloroplastic	http://www.genome.jp/dbget-bin/www_bget?sot:102580011	-	DnaJ domain||DnaJ domain, conserved site
333	PGSC0003DMG400011435	22.1129	107.709	-2.2842	0.0031913	0.019116	DOWN	GO:1901360//GO:0006139//GO:0044271//GO:0044237//GO:0019219//GO:0009059//GO:0019222//GO:0043170//GO:0032774//GO:0010468//GO:0065007//GO:0016070//GO:0034641//GO:0060255//GO:0010556//GO:0034654//GO:0050794//GO:0018130//GO:0006807//GO:0009058//GO:0010467//GO:0090304//GO:0044238//GO:0046483//GO:1903506//GO:0051252//GO:0008152//GO:0044260//GO:1901576//GO:2001141//GO:0006725//GO:0097659//GO:0071704//GO:…	organic cyclic compound metabolic process//nucleobase-containing compound metabolic process//cellular nitrogen compound biosynthetic process//cellular metabolic process//regulation of nucleobase-containing compound metabolic process//macromolecule biosynthetic process//regulation of metabolic process//macromolecule metabolic process//RNA biosynthetic process//regulation of gene expression//biolog…	GO:0044424//GO:0043229//GO:0005623//GO:0005622//GO:0005634//GO:0044464//GO:0005575//GO:0043231//GO:0043227//GO:0043226	intracellular part//intracellular organelle//cell//intracellular//nucleus//cell part//cellular_component//intracellular membrane-bounded organelle//membrane-bounded organelle//organelle	GO:0005488//GO:0003677//GO:0003674//GO:0003676//GO:1901363//GO:0097159	binding//DNA binding//molecular_function//nucleic acid binding//heterocyclic compound binding//organic cyclic compound binding	no KO assigned | (RefSeq) uncharacterized LOC102578723	http://www.genome.jp/dbget-bin/www_bget?sot:102578723	-	Myb domain, plants||Myb domain||MYB-CC type transcription factor, LHEQLE-containing domain||SANT/Myb domain||Homeobox domain-like
334	PGSC0003DMG400011470	416.689	872.261	-1.0658	0.0010035	0.0074493	DOWN	--	--	GO:0043227//GO:0016020//GO:0043231//GO:0005575//GO:0009507//GO:0005737//GO:0043226//GO:0009536//GO:0043229//GO:0016021//GO:0044424//GO:0044425//GO:0044464//GO:0031224//GO:0005622//GO:0005623//GO:0044444	membrane-bounded organelle//membrane//intracellular membrane-bounded organelle//cellular_component//chloroplast//cytoplasm//organelle//plastid//intracellular organelle//integral component of membrane//intracellular part//membrane part//cell part//intrinsic component of membrane//intracellular//cell//cytoplasmic part	--	--	no KO assigned | (RefSeq) uncharacterized LOC102580916	http://www.genome.jp/dbget-bin/www_bget?sot:102580916	-	Chlorophyll A-B binding protein||Chlorophyll a/b binding protein domain
335	PGSC0003DMG400011530	7126.6	18111.6	-1.3456	2.4757e-05	0.0003195	DOWN	GO:0071704//GO:0006006//GO:0005975//GO:0008152//GO:0019318//GO:0055114//GO:0008150//GO:0005996//GO:0044238	organic substance metabolic process//glucose metabolic process//carbohydrate metabolic process//metabolic process//hexose metabolic process//oxidation-reduction process//biological_process//monosaccharide metabolic process//primary metabolic process	--	--	GO:0003674//GO:0036094//GO:0016903//GO:0050662//GO:0097159//GO:0016620//GO:1901363//GO:0003824//GO:0016491//GO:1901265//GO:0048037//GO:0050661//GO:0005488//GO:0051287//GO:0000166	molecular_function//small molecule binding//oxidoreductase activity, acting on the aldehyde or oxo group of donors//coenzyme binding//organic cyclic compound binding//oxidoreductase activity, acting on the aldehyde or oxo group of donors, NAD or NADP as acceptor//heterocyclic compound binding//catalytic activity//oxidoreductase activity//nucleoside phosphate binding//cofactor binding//NADP bindin…	K05298 glyceraldehyde-3-phosphate dehydrogenase (NADP+) (phosphorylating) [EC:1.2.1.13] | (RefSeq) glyceraldehyde-3-phosphate dehydrogenase A, chloroplastic	http://www.genome.jp/dbget-bin/www_bget?sot:102587206	-	Glyceraldehyde-3-phosphate dehydrogenase, type I||NAD(P)-binding domain||Glyceraldehyde 3-phosphate dehydrogenase, active site||Glyceraldehyde 3-phosphate dehydrogenase, NAD(P) binding domain||Glyceraldehyde/Erythrose phosphate dehydrogenase family||Glyceraldehyde 3-phosphate dehydrogenase, catalytic domain
336	PGSC0003DMG400011682	115.382	276.283	-1.2597	0.0025708	0.016039	DOWN	GO:0008152//GO:0008150	metabolic process//biological_process	--	--	GO:0016758//GO:0003674//GO:0016757//GO:0016740//GO:0003824	transferase activity, transferring hexosyl groups//molecular_function//transferase activity, transferring glycosyl groups//transferase activity//catalytic activity	no KO assigned | (RefSeq) UDP-glycosyltransferase 79B6-like	http://www.genome.jp/dbget-bin/www_bget?sot:102586973	-	UDP-glucuronosyl/UDP-glucosyltransferase||UDP-glycosyltransferase family, conserved site
337	PGSC0003DMG400011812	92.1088	245.581	-1.4148	0.00035733	0.0031456	DOWN	--	--	GO:0031224//GO:0044425//GO:0016021//GO:0005575//GO:0016020	intrinsic component of membrane//membrane part//integral component of membrane//cellular_component//membrane	--	--	no KO assigned | (RefSeq) uncharacterized LOC102581276	http://www.genome.jp/dbget-bin/www_bget?sot:102581276	--	--
338	PGSC0003DMG400011851	115.983	240.415	-1.0516	0.0088019	0.042846	DOWN	--	--	--	--	--	--	no KO assigned | (RefSeq) protein trichome birefringence-like 10	http://www.genome.jp/dbget-bin/www_bget?sot:102598636	-	Trichome birefringence-like family
339	PGSC0003DMG400011930	1194.8	2525.47	-1.0798	0.00042522	0.0036368	DOWN	--	--	--	--	--	--	no KO assigned | (RefSeq) protein yippee-like	http://www.genome.jp/dbget-bin/www_bget?sot:102582035	--	--
340	PGSC0003DMG400012012	330.9	2026.73	-2.6147	9.0695e-16	7.6952e-14	DOWN	GO:0006163//GO:0009126//GO:0046128//GO:0006757//GO:0008150//GO:1901564//GO:0009199//GO:0006733//GO:1901657//GO:0009185//GO:0006090//GO:0044281//GO:0009987//GO:0019637//GO:0009056//GO:0006082//GO:0006796//GO:0046939//GO:0008152//GO:0009144//GO:0006793//GO:0009141//GO:0032787//GO:0006725//GO:0071704//GO:0009123//GO:0009132//GO:0009117//GO:0046034//GO:0016052//GO:0055086//GO:0046496//GO:0005975//GO:…	purine nucleotide metabolic process//purine nucleoside monophosphate metabolic process//purine ribonucleoside metabolic process//ATP generation from ADP//biological_process//organonitrogen compound metabolic process//ribonucleoside triphosphate metabolic process//oxidoreduction coenzyme metabolic process//glycosyl compound metabolic process//ribonucleoside diphosphate metabolic process//pyruvate …	--	--	GO:0003824//GO:0016829//GO:0003674//GO:0016830//GO:0016832//GO:0004332	catalytic activity//lyase activity//molecular_function//carbon-carbon lyase activity//aldehyde-lyase activity//fructose-bisphosphate aldolase activity	K01623 fructose-bisphosphate aldolase, class I [EC:4.1.2.13] | (RefSeq) fructose-bisphosphate aldolase 1, chloroplastic-like	http://www.genome.jp/dbget-bin/www_bget?sot:102606020	-	Aldolase-type TIM barrel||Fructose-bisphosphate aldolase class-I active site||Fructose-bisphosphate aldolase, class-I
341	PGSC0003DMG400012038	1765.13	4413.96	-1.3223	1.479e-05	0.00020487	DOWN	GO:0006807//GO:0009058//GO:0010467//GO:0090304//GO:0007275//GO:0046483//GO:0044238//GO:0065007//GO:0010468//GO:0032774//GO:0034641//GO:0016070//GO:0034654//GO:0010556//GO:0060255//GO:0018130//GO:0050794//GO:0019219//GO:0009059//GO:0032501//GO:0019222//GO:0043170//GO:0006139//GO:1901360//GO:0044271//GO:0044237//GO:0032502//GO:0080090//GO:1901362//GO:0051171//GO:0009987//GO:0006355//GO:0031326//GO:…	nitrogen compound metabolic process//biosynthetic process//gene expression//nucleic acid metabolic process//multicellular organism development//heterocycle metabolic process//primary metabolic process//biological regulation//regulation of gene expression//RNA biosynthetic process//cellular nitrogen compound metabolic process//RNA metabolic process//nucleobase-containing compound biosynthetic proc…	GO:0005622//GO:0005634//GO:0044464//GO:0005623//GO:0043229//GO:0044424//GO:0043226//GO:0005575//GO:0043231//GO:0043227	intracellular//nucleus//cell part//cell//intracellular organelle//intracellular part//organelle//cellular_component//intracellular membrane-bounded organelle//membrane-bounded organelle	GO:0003677//GO:0005488//GO:0097159//GO:0003676//GO:1901363//GO:0003674//GO:0003700	DNA binding//binding//organic cyclic compound binding//nucleic acid binding//heterocyclic compound binding//molecular_function//DNA-binding transcription factor activity	K09284 AP2-like factor, euAP2 lineage | (RefSeq) ethylene-responsive transcription factor RAP2-7	http://www.genome.jp/dbget-bin/www_bget?sot:102579807	-	DNA-binding domain||AP2-like ethylene-responsive transcription factor||AP2/ERF domain
342	PGSC0003DMG400012155	1276.67	2910.32	-1.1888	0.00010126	0.0010855	DOWN	--	--	--	--	--	--	K14496 abscisic acid receptor PYR/PYL family | (RefSeq) abscisic acid receptor PYL9-like	http://www.genome.jp/dbget-bin/www_bget?sot:102591194	-	Polyketide cyclase/dehydrase||START-like domain
343	PGSC0003DMG400012162	584.516	1198.93	-1.0364	0.0011633	0.0084111	DOWN	--	--	--	--	--	--	no KO assigned | (RefSeq) uncharacterized LOC102596734	http://www.genome.jp/dbget-bin/www_bget?sot:102596734	--	--
344	PGSC0003DMG400012221	85.5148	261.931	-1.6149	0.00012349	0.0012887	DOWN	--	--	--	--	--	--	no KO assigned | (RefSeq) restin homolog	http://www.genome.jp/dbget-bin/www_bget?sot:102596448	-	EEIG1/EHBP1 N-terminal domain
345	PGSC0003DMG400012414	21.7077	66.0703	-1.6058	0.0092066	0.044344	DOWN	--	--	--	--	--	--	K16054 methylthioribulose 1-phosphate dehydratase / enolase-phosphatase E1 [EC:4.2.1.109 3.1.3.77] | (RefSeq) probable bifunctional methylthioribulose-1-phosphate dehydratase/enolase-phosphatase E1 1	http://www.genome.jp/dbget-bin/www_bget?sot:102592458	--	--
346	PGSC0003DMG400012447	903.093	1810.72	-1.0036	0.0032885	0.019563	DOWN	GO:0044267//GO:0006468//GO:0044238//GO:0036211//GO:0019538//GO:0044237//GO:0016310//GO:0043170//GO:0006464//GO:0043412//GO:0008150//GO:0009987//GO:0006796//GO:0008152//GO:0006793//GO:0071704//GO:0044260	cellular protein metabolic process//protein phosphorylation//primary metabolic process//protein modification process//protein metabolic process//cellular metabolic process//phosphorylation//macromolecule metabolic process//cellular protein modification process//macromolecule modification//biological_process//cellular process//phosphate-containing compound metabolic process//metabolic process//pho…	--	--	GO:0001883//GO:0000166//GO:0001882//GO:0016772//GO:0004672//GO:0016773//GO:0043168//GO:0032559//GO:0032549//GO:0005488//GO:1901265//GO:0097367//GO:0017076//GO:0030554//GO:0003824//GO:1901363//GO:0016740//GO:0097159//GO:0032553//GO:0005524//GO:0016301//GO:0032550//GO:0035639//GO:0032555//GO:0043167//GO:0003674//GO:0036094	purine nucleoside binding//nucleotide binding//nucleoside binding//transferase activity, transferring phosphorus-containing groups//protein kinase activity//phosphotransferase activity, alcohol group as acceptor//anion binding//adenyl ribonucleotide binding//ribonucleoside binding//binding//nucleoside phosphate binding//carbohydrate derivative binding//purine nucleotide binding//adenyl nucleotide…	no KO assigned | (RefSeq) probable serine/threonine-protein kinase At1g54610	http://www.genome.jp/dbget-bin/www_bget?sot:102589883	-	Protein kinase domain||Protein kinase, ATP binding site||Serine/threonine-protein kinase, active site||Protein kinase-like domain
347	PGSC0003DMG400012470	100.346	225.889	-1.1706	0.0031838	0.01909	DOWN	GO:0006952//GO:0050896//GO:0006950//GO:0008150	defense response//response to stimulus//response to stress//biological_process	--	--	GO:0001882//GO:0001883//GO:0000166//GO:0017076//GO:1901265//GO:0097367//GO:0032559//GO:0032549//GO:0005488//GO:0043168//GO:0097159//GO:0030554//GO:1901363//GO:0036094//GO:0003674//GO:0043167//GO:0032550//GO:0032555//GO:0043531//GO:0032553	nucleoside binding//purine nucleoside binding//nucleotide binding//purine nucleotide binding//nucleoside phosphate binding//carbohydrate derivative binding//adenyl ribonucleotide binding//ribonucleoside binding//binding//anion binding//organic cyclic compound binding//adenyl nucleotide binding//heterocyclic compound binding//small molecule binding//molecular_function//ion binding//purine ribonucl…	K13459 disease resistance protein RPS2 | (RefSeq) disease resistance protein At4g27190-like	http://www.genome.jp/dbget-bin/www_bget?sot:102590032	-	NB-ARC||Leucine-rich repeat domain, L domain-like||P-loop containing nucleoside triphosphate hydrolase||Winged helix-turn-helix DNA-binding domain
348	PGSC0003DMG400012492	37.1795	167.27	-2.1696	3.1169e-06	5.1973e-05	DOWN	GO:0008150//GO:0006508//GO:0008152//GO:0071704//GO:0019538//GO:0044238//GO:0043170	biological_process//proteolysis//metabolic process//organic substance metabolic process//protein metabolic process//primary metabolic process//macromolecule metabolic process	--	--	GO:0017171//GO:0003824//GO:0070011//GO:0004175//GO:0016787//GO:0004252//GO:0003674//GO:0008236//GO:0008233	serine hydrolase activity//catalytic activity//peptidase activity, acting on L-amino acid peptides//endopeptidase activity//hydrolase activity//serine-type endopeptidase activity//molecular_function//serine-type peptidase activity//peptidase activity	no KO assigned | (RefSeq) subtilisin-like protease SBT1.7	http://www.genome.jp/dbget-bin/www_bget?sot:102580546	-	Cucumisin-like catalytic domain||Peptidase S8/S53 domain||Peptidase S8, subtilisin, Asp-active site||PA domain||Peptidase S8, subtilisin-related
349	PGSC0003DMG400012590	740.922	1580.38	-1.0929	0.00038423	0.0033429	DOWN	GO:0044237//GO:0043170//GO:0006464//GO:0006091//GO:0044267//GO:0019684//GO:0018298//GO:0036211//GO:0044238//GO:0019538//GO:0015979//GO:0008152//GO:0071704//GO:0009765//GO:0044260//GO:0043412//GO:0008150//GO:0009987	cellular metabolic process//macromolecule metabolic process//cellular protein modification process//generation of precursor metabolites and energy//cellular protein metabolic process//photosynthesis, light reaction//protein-chromophore linkage//protein modification process//primary metabolic process//protein metabolic process//photosynthesis//metabolic process//organic substance metabolic process…	GO:0044425//GO:0055035//GO:0044424//GO:0042651//GO:0009535//GO:0044435//GO:0044446//GO:0043229//GO:0016021//GO:0044422//GO:0009534//GO:0044444//GO:0005623//GO:0009521//GO:0044434//GO:0009523//GO:0009522//GO:0031224//GO:0044464//GO:0005622//GO:0009507//GO:0005737//GO:0016020//GO:0043227//GO:0031984//GO:0032991//GO:0043231//GO:0005575//GO:0044436//GO:0009536//GO:0031976//GO:0098796//GO:0043226//GO:…	membrane part//plastid thylakoid membrane//intracellular part//thylakoid membrane//chloroplast thylakoid membrane//plastid part//intracellular organelle part//intracellular organelle//integral component of membrane//organelle part//chloroplast thylakoid//cytoplasmic part//cell//photosystem//chloroplast part//photosystem II//photosystem I//intrinsic component of membrane//cell part//intracellular/…	GO:0005488//GO:0046906//GO:0003674//GO:0016168//GO:1901363//GO:0097159	binding//tetrapyrrole binding//molecular_function//chlorophyll binding//heterocyclic compound binding//organic cyclic compound binding	K08917 light-harvesting complex II chlorophyll a/b binding protein 6 | (RefSeq) chlorophyll a-b binding protein CP24 10B, chloroplastic	http://www.genome.jp/dbget-bin/www_bget?sot:102586172	-	Chlorophyll a/b binding protein domain||Chlorophyll A-B binding protein||Chlorophyll A-B binding protein, plant
350	PGSC0003DMG400012591	320.342	787.673	-1.298	0.0001758	0.0017399	DOWN	GO:0043170//GO:0006464//GO:0044237//GO:0036211//GO:0044238//GO:0019538//GO:0006091//GO:0044267//GO:0019684//GO:0018298//GO:0071704//GO:0009765//GO:0044260//GO:0015979//GO:0008152//GO:0009987//GO:0043412//GO:0008150	macromolecule metabolic process//cellular protein modification process//cellular metabolic process//protein modification process//primary metabolic process//protein metabolic process//generation of precursor metabolites and energy//cellular protein metabolic process//photosynthesis, light reaction//protein-chromophore linkage//organic substance metabolic process//photosynthesis, light harvesting/…	GO:0009535//GO:0044435//GO:0044446//GO:0043229//GO:0016021//GO:0044422//GO:0044425//GO:0044424//GO:0055035//GO:0042651//GO:0031224//GO:0044464//GO:0005622//GO:0009534//GO:0044444//GO:0005623//GO:0009521//GO:0044434//GO:0009523//GO:0009522//GO:0016020//GO:0043227//GO:0031984//GO:0032991//GO:0043231//GO:0005575//GO:0009507//GO:0005737//GO:0043226//GO:0034357//GO:0009579//GO:0044436//GO:0009536//GO:…	chloroplast thylakoid membrane//plastid part//intracellular organelle part//intracellular organelle//integral component of membrane//organelle part//membrane part//intracellular part//plastid thylakoid membrane//thylakoid membrane//intrinsic component of membrane//cell part//intracellular//chloroplast thylakoid//cytoplasmic part//cell//photosystem//chloroplast part//photosystem II//photosystem I/…	GO:0005488//GO:0003674//GO:0016168//GO:0046906//GO:0097159//GO:1901363	binding//molecular_function//chlorophyll binding//tetrapyrrole binding//organic cyclic compound binding//heterocyclic compound binding	K08917 light-harvesting complex II chlorophyll a/b binding protein 6 | (RefSeq) chlorophyll a-b binding protein CP24 10A, chloroplastic	http://www.genome.jp/dbget-bin/www_bget?sot:102586836	-	Chlorophyll a/b binding protein domain||Chlorophyll A-B binding protein||Chlorophyll A-B binding protein, plant
351	PGSC0003DMG400012597	0.691567	19.4252	-4.8119	0.0015928	0.010885	DOWN	--	--	--	--	--	--	--	--	--	--
352	PGSC0003DMG400012646	75.6163	226.153	-1.5805	0.00017686	0.0017498	DOWN	--	--	--	--	--	--	no KO assigned | (RefSeq) histone H3.v1-like	http://www.genome.jp/dbget-bin/www_bget?sot:102590569	-	TPX2, C-terminal
353	PGSC0003DMG400012647	644.091	1629.38	-1.339	2.1182e-05	0.00027962	DOWN	--	--	--	--	--	--	no KO assigned | (RefSeq) uncharacterized LOC102591163	http://www.genome.jp/dbget-bin/www_bget?sot:102591163	-	Domain of unknown function DUF971
354	PGSC0003DMG400012666	385.916	2396.08	-2.6343	3.587e-16	3.208e-14	DOWN	GO:0044238//GO:0009058//GO:0019685//GO:0043094//GO:0015977//GO:0019253//GO:0044237//GO:0009987//GO:0055114//GO:0044249//GO:0008150//GO:0016051//GO:0071704//GO:0009853//GO:1901576//GO:0005975//GO:0008152//GO:0015979	primary metabolic process//biosynthetic process//photosynthesis, dark reaction//cellular metabolic compound salvage//carbon fixation//reductive pentose-phosphate cycle//cellular metabolic process//cellular process//oxidation-reduction process//cellular biosynthetic process//biological_process//carbohydrate biosynthetic process//organic substance metabolic process//photorespiration//organic substa…	GO:0044464//GO:0005622//GO:0005623//GO:0044444//GO:0043229//GO:0044424//GO:0043226//GO:0009536//GO:0043227//GO:0005575//GO:0043231//GO:0005737//GO:0009507	cell part//intracellular//cell//cytoplasmic part//intracellular organelle//intracellular part//organelle//plastid//membrane-bounded organelle//cellular_component//intracellular membrane-bounded organelle//cytoplasm//chloroplast	GO:0016830//GO:0016984//GO:0004497//GO:0003824//GO:0016491//GO:0003674//GO:0016829//GO:0016831	carbon-carbon lyase activity//ribulose-bisphosphate carboxylase activity//monooxygenase activity//catalytic activity//oxidoreductase activity//molecular_function//lyase activity//carboxy-lyase activity	K01602 ribulose-bisphosphate carboxylase small chain [EC:4.1.1.39] | (RefSeq) RBCS-2B, rbcS2b; ribulose bisphosphate carboxylase small chain 2C, chloroplastic	http://www.genome.jp/dbget-bin/www_bget?sot:102601229	RBCS-2C	Ribulose bisphosphate carboxylase small chain, domain||Ribulose-1,5-bisphosphate carboxylase small subunit, N-terminal||Ribulose bisphosphate carboxylase, small chain
355	PGSC0003DMG400012820	205	488.458	-1.2526	0.00037836	0.0032966	DOWN	GO:0008150//GO:0006810//GO:0051234//GO:0009987//GO:0051179//GO:0055085	biological_process//transport//establishment of localization//cellular process//localization//transmembrane transport	GO:0016020//GO:0005575//GO:0031224//GO:0044425//GO:0016021	membrane//cellular_component//intrinsic component of membrane//membrane part//integral component of membrane	GO:0005509//GO:0043167//GO:0003674//GO:0043169//GO:0005488//GO:0046872	calcium ion binding//ion binding//molecular_function//cation binding//binding//metal ion binding	no KO assigned | (RefSeq) uncharacterized LOC102593213	http://www.genome.jp/dbget-bin/www_bget?sot:102593213	-	Sodium/calcium exchanger membrane region||EF-Hand 1, calcium-binding site||EF-hand domain||EF-hand domain pair
356	PGSC0003DMG400013000	105.173	258.117	-1.2953	0.00081056	0.0062295	DOWN	--	--	--	--	--	--	no KO assigned | (RefSeq) uncharacterized LOC102605029	http://www.genome.jp/dbget-bin/www_bget?sot:102605029	--	--
357	PGSC0003DMG400013018	29.44	95.0566	-1.691	0.0014265	0.0099398	DOWN	GO:0044237//GO:0048646//GO:0010223//GO:1901360//GO:1901601//GO:0048856//GO:0032501//GO:1901334//GO:0044255//GO:0016114//GO:0006721//GO:0010346//GO:0018130//GO:1901600//GO:0006629//GO:0001763//GO:0044238//GO:0046483//GO:0007275//GO:0008299//GO:0009058//GO:0008152//GO:0016106//GO:0071704//GO:1901576//GO:0009653//GO:1901336//GO:0048731//GO:0044249//GO:0008150//GO:0010016//GO:0006720//GO:0009987//GO:…	cellular metabolic process//anatomical structure formation involved in morphogenesis//secondary shoot formation//organic cyclic compound metabolic process//strigolactone biosynthetic process//anatomical structure development//multicellular organismal process//lactone metabolic process//cellular lipid metabolic process//terpenoid biosynthetic process//terpenoid metabolic process//shoot axis format…	--	--	--	--	no KO assigned | (RefSeq) probable esterase D14L	http://www.genome.jp/dbget-bin/www_bget?sot:102593554	-	Alpha/Beta hydrolase fold||Strigolactone esterase D14 family||Alpha/beta hydrolase fold-1
358	PGSC0003DMG400013130	0.356097	23.6236	-6.0518	0.00012073	0.0012629	DOWN	--	--	--	--	--	--	no KO assigned | (RefSeq) protein FAF-like, chloroplastic	http://www.genome.jp/dbget-bin/www_bget?sot:102581020	-	The fantastic four family
359	PGSC0003DMG400013132	70.7854	213.851	-1.5951	0.00011958	0.0012526	DOWN	--	--	--	--	--	--	no KO assigned | (RefSeq) uncharacterized LOC102592680	http://www.genome.jp/dbget-bin/www_bget?sot:102592680	-	Protein of unknown function DUF3148
360	PGSC0003DMG400013184	143.751	307.304	-1.0961	0.0031257	0.018787	DOWN	--	--	--	--	GO:0046914//GO:0043169//GO:0046872//GO:0005488//GO:0003674//GO:0043167//GO:0008270	transition metal ion binding//cation binding//metal ion binding//binding//molecular_function//ion binding//zinc ion binding	K16276 zinc finger protein-like protein | (RefSeq) uncharacterized LOC102605439	http://www.genome.jp/dbget-bin/www_bget?sot:102605439	-	Zinc finger, CHY-type||Zinc finger, CTCHY-type||Haemerythrin-like||Zinc finger, RING/FYVE/PHD-type||Zinc finger, RING-type
361	PGSC0003DMG400013216	538.544	1204.91	-1.1618	0.00025353	0.0023625	DOWN	--	--	--	--	--	--	--	--	--	--
362	PGSC0003DMG400013290	905.765	1832.19	-1.0164	0.001213	0.0086921	DOWN	--	--	GO:0005575//GO:0016020//GO:0016021//GO:0044425//GO:0031224	cellular_component//membrane//integral component of membrane//membrane part//intrinsic component of membrane	--	--	no KO assigned | (RefSeq) F-box protein CPR30-like	http://www.genome.jp/dbget-bin/www_bget?sot:102589673	-	F-box associated interaction domain||F-box domain
363	PGSC0003DMG400013296	465.526	1180.56	-1.3425	2.2186e-05	0.00029117	DOWN	GO:0006810//GO:0051234//GO:0008150//GO:0030001//GO:0006812//GO:0006811//GO:0051179	transport//establishment of localization//biological_process//metal ion transport//cation transport//ion transport//localization	--	--	GO:0003674//GO:0043167//GO:0005488//GO:0046872//GO:0043169	molecular_function//ion binding//binding//metal ion binding//cation binding	no KO assigned | (RefSeq) uncharacterized LOC102586960	http://www.genome.jp/dbget-bin/www_bget?sot:102586960	-	Heavy metal-associated domain, HMA
364	PGSC0003DMG400013319	5.67835	40.8311	-2.8461	0.00098818	0.0073462	DOWN	GO:0050896//GO:0010033//GO:0009725//GO:0009719//GO:0042221//GO:0008150//GO:0009733	response to stimulus//response to organic substance//response to hormone//response to endogenous stimulus//response to chemical//biological_process//response to auxin	--	--	--	--	K14488 SAUR family protein | (RefSeq) auxin-responsive protein SAUR21-like	http://www.genome.jp/dbget-bin/www_bget?sot:102586724	-	Small auxin-up RNA
365	PGSC0003DMG400013413	1.42581	27.2923	-4.2586	0.00038642	0.003357	DOWN	GO:0043412//GO:0008150//GO:0009987//GO:0008152//GO:0015979//GO:0071704//GO:0044260//GO:0009765//GO:0044267//GO:0006091//GO:0018298//GO:0019684//GO:0044238//GO:0036211//GO:0019538//GO:0044237//GO:0043170//GO:0006464	macromolecule modification//biological_process//cellular process//metabolic process//photosynthesis//organic substance metabolic process//cellular macromolecule metabolic process//photosynthesis, light harvesting//cellular protein metabolic process//generation of precursor metabolites and energy//protein-chromophore linkage//photosynthesis, light reaction//primary metabolic process//protein modif…	GO:0009536//GO:0044436//GO:0098796//GO:0031976//GO:0043226//GO:0009579//GO:0034357//GO:0005737//GO:0009507//GO:0032991//GO:0031984//GO:0043227//GO:0016020//GO:0005575//GO:0043231//GO:0009521//GO:0005623//GO:0044444//GO:0009534//GO:0009522//GO:0009523//GO:0044434//GO:0044464//GO:0031224//GO:0005622//GO:0055035//GO:0044424//GO:0044425//GO:0042651//GO:0044435//GO:0009535//GO:0016021//GO:0044422//GO:…	plastid//thylakoid part//membrane protein complex//plastid thylakoid//organelle//thylakoid//photosynthetic membrane//cytoplasm//chloroplast//protein-containing complex//organelle subcompartment//membrane-bounded organelle//membrane//cellular_component//intracellular membrane-bounded organelle//photosystem//cell//cytoplasmic part//chloroplast thylakoid//photosystem I//photosystem II//chloroplast p…	GO:1901363//GO:0097159//GO:0046906//GO:0016168//GO:0003674//GO:0005488	heterocyclic compound binding//organic cyclic compound binding//tetrapyrrole binding//chlorophyll binding//molecular_function//binding	K08912 light-harvesting complex II chlorophyll a/b binding protein 1 | (RefSeq) chlorophyll a-b binding protein 3C, chloroplastic	http://www.genome.jp/dbget-bin/www_bget?sot:102605549	-	Chlorophyll A-B binding protein, plant||Chlorophyll A-B binding protein||Chlorophyll a/b binding protein domain
366	PGSC0003DMG400013426	845.53	1757.2	-1.0553	0.00207	0.013472	DOWN	--	--	--	--	--	--	no KO assigned | (RefSeq) uncharacterized protein At3g27210	http://www.genome.jp/dbget-bin/www_bget?sot:102586409	--	--
367	PGSC0003DMG400013437	3487.27	8502.87	-1.2859	1.23e-05	0.00017402	DOWN	GO:0000103//GO:0008152//GO:0009987//GO:0006790//GO:0008150//GO:0044237	sulfate assimilation//metabolic process//cellular process//sulfur compound metabolic process//biological_process//cellular metabolic process	--	--	GO:0003674//GO:0016779//GO:0003824//GO:0016740//GO:0070566//GO:0004781//GO:0004779//GO:0016772	molecular_function//nucleotidyltransferase activity//catalytic activity//transferase activity//adenylyltransferase activity//sulfate adenylyltransferase (ATP) activity//sulfate adenylyltransferase activity//transferase activity, transferring phosphorus-containing groups	K13811 3'-phosphoadenosine 5'-phosphosulfate synthase [EC:2.7.7.4 2.7.1.25] | (RefSeq) ATP sulfurylase 1, chloroplastic-like	http://www.genome.jp/dbget-bin/www_bget?sot:102593381	-	ATP-sulfurylase PUA-like domain||Sulphate adenylyltransferase catalytic domain||Rossmann-like alpha/beta/alpha sandwich fold||PUA-like domain||Sulphate adenylyltransferase
368	PGSC0003DMG400013713	343.939	1167.99	-1.7638	7.6249e-08	1.8462e-06	DOWN	--	--	--	--	--	--	--	--	--	--
369	PGSC0003DMG400013804	95.868	310.863	-1.6972	9.8105e-06	0.00014231	DOWN	GO:0043412//GO:0008150//GO:0009987//GO:0006796//GO:0008152//GO:0006793//GO:0071704//GO:0044260//GO:0044267//GO:0036211//GO:0006468//GO:0044238//GO:0019538//GO:0044237//GO:0043170//GO:0016310//GO:0006464	macromolecule modification//biological_process//cellular process//phosphate-containing compound metabolic process//metabolic process//phosphorus metabolic process//organic substance metabolic process//cellular macromolecule metabolic process//cellular protein metabolic process//protein modification process//protein phosphorylation//primary metabolic process//protein metabolic process//cellular me…	--	--	GO:1901363//GO:0003824//GO:0030554//GO:0016740//GO:0097159//GO:0016301//GO:0005524//GO:0032553//GO:0032555//GO:0035639//GO:0032550//GO:0043167//GO:0036094//GO:0003674//GO:0000166//GO:0001883//GO:0004672//GO:0016772//GO:0001882//GO:0016773//GO:0043168//GO:0005488//GO:0032549//GO:0032559//GO:0097367//GO:1901265//GO:0017076	heterocyclic compound binding//catalytic activity//adenyl nucleotide binding//transferase activity//organic cyclic compound binding//kinase activity//ATP binding//ribonucleotide binding//purine ribonucleotide binding//purine ribonucleoside triphosphate binding//purine ribonucleoside binding//ion binding//small molecule binding//molecular_function//nucleotide binding//purine nucleoside binding//pr…	no KO assigned | (RefSeq) non-functional pseudokinase ZED1-like	http://www.genome.jp/dbget-bin/www_bget?sot:102598154	-	Protein kinase domain||Protein kinase-like domain
370	PGSC0003DMG400013820	8.11057	36.8756	-2.1848	0.01038	0.048618	DOWN	--	--	--	--	--	--	--	--	--	--
371	PGSC0003DMG400013852	101.564	301.544	-1.57	5.8618e-05	0.00068111	DOWN	--	--	--	--	--	--	--	--	-	Domain of unknown function DUF4283
372	PGSC0003DMG400013931	309.191	646.796	-1.0648	0.0016141	0.01099	DOWN	--	--	--	--	--	--	--	--	--	--
373	PGSC0003DMG400013962	179.374	498.126	-1.4735	0.0081617	0.04045	DOWN	--	--	GO:0031224//GO:0044425//GO:0016021//GO:0005575//GO:0016020	intrinsic component of membrane//membrane part//integral component of membrane//cellular_component//membrane	--	--	K15015 solute carrier family 32 (vesicular inhibitory amino acid transporter) | (RefSeq) vacuolar amino acid transporter 1-like	http://www.genome.jp/dbget-bin/www_bget?sot:102602953	-	Amino acid transporter, transmembrane domain
374	PGSC0003DMG400013984	1792.23	9273.98	-2.3714	0.0019053	0.012581	DOWN	--	--	--	--	--	--	no KO assigned | (RefSeq) lipoxygenase homology domain-containing protein 1-like	http://www.genome.jp/dbget-bin/www_bget?sot:102600561	-	PLAT/LH2 domain
375	PGSC0003DMG400014077	331.327	779.456	-1.2342	0.00016119	0.0016157	DOWN	--	--	--	--	--	--	--	--	--	--
376	PGSC0003DMG400014136	1576.66	3818.53	-1.2761	2.7764e-05	0.00035304	DOWN	GO:0043039//GO:0006082//GO:0009987//GO:0044281//GO:0043038//GO:0044249//GO:1901566//GO:0008150//GO:1901564//GO:0034660//GO:1901576//GO:0044260//GO:0006520//GO:0043604//GO:0034645//GO:0006518//GO:0006433//GO:0071704//GO:0006725//GO:0008152//GO:0010467//GO:0043603//GO:0006807//GO:0019538//GO:0009058//GO:0043436//GO:0044238//GO:0046483//GO:0006418//GO:0006412//GO:0090304//GO:0034641//GO:0016070//GO:…	tRNA aminoacylation//organic acid metabolic process//cellular process//small molecule metabolic process//amino acid activation//cellular biosynthetic process//organonitrogen compound biosynthetic process//biological_process//organonitrogen compound metabolic process//ncRNA metabolic process//organic substance biosynthetic process//cellular macromolecule metabolic process//cellular amino acid meta…	GO:0005575//GO:0005737//GO:0005622//GO:0044464//GO:0005623//GO:0044424	cellular_component//cytoplasm//intracellular//cell part//cell//intracellular part	GO:0097159//GO:0004827//GO:0004812//GO:1901363//GO:0003824//GO:0030554//GO:0003674//GO:0036094//GO:0043167//GO:0035639//GO:0032555//GO:0032550//GO:0032553//GO:0005524//GO:0001882//GO:0000166//GO:0001883//GO:0017076//GO:0016874//GO:0097367//GO:0016875//GO:1901265//GO:0005488//GO:0032549//GO:0032559//GO:0043168	organic cyclic compound binding//proline-tRNA ligase activity//aminoacyl-tRNA ligase activity//heterocyclic compound binding//catalytic activity//adenyl nucleotide binding//molecular_function//small molecule binding//ion binding//purine ribonucleoside triphosphate binding//purine ribonucleotide binding//purine ribonucleoside binding//ribonucleotide binding//ATP binding//nucleoside binding//nucleo…	K01881 prolyl-tRNA synthetase [EC:6.1.1.15] | (RefSeq) proline--tRNA ligase, cytoplasmic-like	http://www.genome.jp/dbget-bin/www_bget?sot:102578711	-	Prolyl-tRNA synthetase, class II||Proline-tRNA ligase, class IIa||Proline-tRNA ligase, class IIa, archaeal-type||Aminoacyl-tRNA synthetase, class II (G/ P/ S/T)||Anticodon-binding||Proline-tRNA ligase, class II, C-terminal||Prolyl-tRNA synthetase, catalytic domain||Aminoacyl-tRNA synthetase, class II
377	PGSC0003DMG400014270	316.632	679.318	-1.1013	0.0011883	0.0085401	DOWN	GO:0055114//GO:0008150//GO:0008152	oxidation-reduction process//biological_process//metabolic process	GO:0031224//GO:0016021//GO:0044425//GO:0005575//GO:0016020	intrinsic component of membrane//integral component of membrane//membrane part//cellular_component//membrane	GO:0046914//GO:0043169//GO:0016705//GO:0020037//GO:0046872//GO:0005488//GO:0004497//GO:0097159//GO:0016491//GO:1901363//GO:0003824//GO:0003674//GO:0043167//GO:0005506//GO:0046906	transition metal ion binding//cation binding//oxidoreductase activity, acting on paired donors, with incorporation or reduction of molecular oxygen//heme binding//metal ion binding//binding//monooxygenase activity//organic cyclic compound binding//oxidoreductase activity//heterocyclic compound binding//catalytic activity//molecular_function//ion binding//iron ion binding//tetrapyrrole binding	no KO assigned | (RefSeq) probable (S)-N-methylcoclaurine 3'-hydroxylase isozyme 2	http://www.genome.jp/dbget-bin/www_bget?sot:102583096	-	Cytochrome P450, E-class, group I||Cytochrome P450, conserved site||Cytochrome P450
378	PGSC0003DMG400014275	44.246	208.62	-2.2373	0.00092162	0.0069328	DOWN	GO:0032259//GO:0008152//GO:0008150	methylation//metabolic process//biological_process	GO:0044425//GO:0016021//GO:0031224//GO:0016020//GO:0005575	membrane part//integral component of membrane//intrinsic component of membrane//membrane//cellular_component	GO:0016741//GO:0003674//GO:0008168//GO:0003824//GO:0016740	transferase activity, transferring one-carbon groups//molecular_function//methyltransferase activity//catalytic activity//transferase activity	no KO assigned | (RefSeq) probable methyltransferase PMT15	http://www.genome.jp/dbget-bin/www_bget?sot:102581772	-	Putative S-adenosyl-L-methionine-dependent methyltransferase||S-adenosyl-L-methionine-dependent methyltransferase
379	PGSC0003DMG400014316	676.298	1889.78	-1.4825	2.4334e-06	4.1459e-05	DOWN	GO:0051093//GO:0009987//GO:0040007//GO:0032502//GO:0048519//GO:0043412//GO:0050793//GO:0016567//GO:0051239//GO:0008150//GO:0050789//GO:0071704//GO:0044260//GO:0008152//GO:0048638//GO:0032446//GO:0044238//GO:0036211//GO:0051241//GO:0019538//GO:0040008//GO:0035265//GO:0046620//GO:0044267//GO:0070647//GO:0065007//GO:0032501//GO:0048589//GO:0043170//GO:0045926//GO:0046621//GO:0006464//GO:0048640//GO:…	negative regulation of developmental process//cellular process//growth//developmental process//negative regulation of biological process//macromolecule modification//regulation of developmental process//protein ubiquitination//regulation of multicellular organismal process//biological_process//regulation of biological process//organic substance metabolic process//cellular macromolecule metabolic …	--	--	GO:0003824//GO:0016740//GO:0003674//GO:0004842//GO:0019787	catalytic activity//transferase activity//molecular_function//ubiquitin-protein transferase activity//ubiquitin-like protein transferase activity	K19045 E3 ubiquitin-protein ligase BIG BROTHER and related proteins [EC:2.3.2.27] | (RefSeq) E3 ubiquitin ligase BIG BROTHER-like	http://www.genome.jp/dbget-bin/www_bget?sot:102583422	-	Zinc finger, RING-type||Zinc finger, RING/FYVE/PHD-type||E3 ubiquitin ligase BIG BROTHER
380	PGSC0003DMG400014367	31.2498	84.2951	-1.4316	0.0099426	0.047105	DOWN	--	--	--	--	--	--	--	--	--	--
381	PGSC0003DMG400014386	2485.83	7294.05	-1.553	2.3342e-07	5.1226e-06	DOWN	GO:0043412//GO:0008150//GO:0009987//GO:0015979//GO:0008152//GO:0071704//GO:0044260//GO:0009765//GO:0006091//GO:0044267//GO:0018298//GO:0019684//GO:0036211//GO:0044238//GO:0019538//GO:0044237//GO:0043170//GO:0006464	macromolecule modification//biological_process//cellular process//photosynthesis//metabolic process//organic substance metabolic process//cellular macromolecule metabolic process//photosynthesis, light harvesting//generation of precursor metabolites and energy//cellular protein metabolic process//protein-chromophore linkage//photosynthesis, light reaction//protein modification process//primary me…	GO:0009536//GO:0044436//GO:0031976//GO:0098796//GO:0043226//GO:0034357//GO:0009579//GO:0009507//GO:0005737//GO:0032991//GO:0016020//GO:0043227//GO:0031984//GO:0043231//GO:0005575//GO:0009521//GO:0009534//GO:0044444//GO:0005623//GO:0009523//GO:0009522//GO:0044434//GO:0044464//GO:0031224//GO:0005622//GO:0055035//GO:0044424//GO:0044425//GO:0042651//GO:0009535//GO:0044435//GO:0043229//GO:0044446//GO:…	plastid//thylakoid part//plastid thylakoid//membrane protein complex//organelle//photosynthetic membrane//thylakoid//chloroplast//cytoplasm//protein-containing complex//membrane//membrane-bounded organelle//organelle subcompartment//intracellular membrane-bounded organelle//cellular_component//photosystem//chloroplast thylakoid//cytoplasmic part//cell//photosystem II//photosystem I//chloroplast p…	GO:1901363//GO:0097159//GO:0046906//GO:0016168//GO:0003674//GO:0005488	heterocyclic compound binding//organic cyclic compound binding//tetrapyrrole binding//chlorophyll binding//molecular_function//binding	K08908 light-harvesting complex I chlorophyll a/b binding protein 2 | (RefSeq) chlorophyll a-b binding protein 7, chloroplastic	http://www.genome.jp/dbget-bin/www_bget?sot:102594790	LHCA2	Chlorophyll A-B binding protein, plant||Chlorophyll a/b binding protein domain||Chlorophyll A-B binding protein
382	PGSC0003DMG400014411	432.782	918.146	-1.0851	0.00086796	0.0066042	DOWN	GO:0071805//GO:0051179//GO:0006813//GO:0006811//GO:0006812//GO:0055085//GO:0098655//GO:0009987//GO:0030001//GO:0006810//GO:0098662//GO:0051234//GO:0008150//GO:0015672//GO:0034220//GO:0098660//GO:0071804	potassium ion transmembrane transport//localization//potassium ion transport//ion transport//cation transport//transmembrane transport//cation transmembrane transport//cellular process//metal ion transport//transport//inorganic cation transmembrane transport//establishment of localization//biological_process//monovalent inorganic cation transport//ion transmembrane transport//inorganic ion transm…	GO:0031224//GO:0016021//GO:0044425//GO:0016020//GO:0005575	intrinsic component of membrane//integral component of membrane//membrane part//membrane//cellular_component	GO:0005261//GO:0046873//GO:0005215//GO:0022838//GO:0015075//GO:0008324//GO:0022890//GO:0015079//GO:0022803//GO:0005267//GO:0022857//GO:0005216//GO:0003674//GO:0015077//GO:0015267	cation channel activity//metal ion transmembrane transporter activity//transporter activity//substrate-specific channel activity//ion transmembrane transporter activity//cation transmembrane transporter activity//inorganic cation transmembrane transporter activity//potassium ion transmembrane transporter activity//passive transmembrane transporter activity//potassium channel activity//transmembra…	K05389 potassium channel subfamily K, other eukaryote | (RefSeq) KCO1B; K+ channel protein	http://www.genome.jp/dbget-bin/www_bget?sot:102577767	-	Two pore domain potassium channel||Potassium channel domain||EF-hand domain pair
383	PGSC0003DMG400014483	60.8771	161.442	-1.407	0.0092359	0.044435	DOWN	GO:0008150//GO:0050789//GO:0044093//GO:0050790//GO:0008152//GO:0043085//GO:0065007//GO:0065009//GO:0051336//GO:0009893//GO:0043087//GO:0043547//GO:0051345//GO:0019222//GO:0048518	biological_process//regulation of biological process//positive regulation of molecular function//regulation of catalytic activity//metabolic process//positive regulation of catalytic activity//biological regulation//regulation of molecular function//regulation of hydrolase activity//positive regulation of metabolic process//regulation of GTPase activity//positive regulation of GTPase activity//po…	--	--	GO:0008047//GO:0030234//GO:0043167//GO:0003674//GO:0005096//GO:0030695//GO:0043169//GO:0060589//GO:0098772//GO:0005488//GO:0046872	enzyme activator activity//enzyme regulator activity//ion binding//molecular_function//GTPase activator activity//GTPase regulator activity//cation binding//nucleoside-triphosphatase regulator activity//molecular function regulator//binding//metal ion binding	no KO assigned | (RefSeq) probable ADP-ribosylation factor GTPase-activating protein AGD14	http://www.genome.jp/dbget-bin/www_bget?sot:102595463	-	Arf GTPase activating protein
384	PGSC0003DMG400014720	0	10.7876	#NAME?	0.008824	0.042925	DOWN	--	--	GO:0031224//GO:0044425//GO:0016021//GO:0016020//GO:0005575	intrinsic component of membrane//membrane part//integral component of membrane//membrane//cellular_component	--	--	no KO assigned | (RefSeq) receptor-like protein 12	http://www.genome.jp/dbget-bin/www_bget?sot:102583963	--	--
385	PGSC0003DMG400014853	2089.39	4274.1	-1.0325	0.00063739	0.0050917	DOWN	--	--	GO:0044425//GO:0016021//GO:0031224//GO:0005575//GO:0016020	membrane part//integral component of membrane//intrinsic component of membrane//cellular_component//membrane	--	--	no KO assigned | (RefSeq) uncharacterized LOC102598753	http://www.genome.jp/dbget-bin/www_bget?sot:102598753	-	Protein of unknown function DUF1218
386	PGSC0003DMG400014966	718.722	1678.73	-1.2239	9.668e-05	0.0010443	DOWN	GO:0044260//GO:1901576//GO:2001141//GO:2000242//GO:0006725//GO:0097659//GO:0071704//GO:0006351//GO:0034645//GO:0090351//GO:0048581//GO:1903506//GO:0061458//GO:0090567//GO:0051252//GO:0008152//GO:0051276//GO:0006338//GO:0032502//GO:0048519//GO:0080090//GO:0048367//GO:0051093//GO:1901362//GO:0051171//GO:0009987//GO:0009845//GO:0009910//GO:0048831//GO:0008150//GO:0031326//GO:0009791//GO:0009908//GO:…	cellular macromolecule metabolic process//organic substance biosynthetic process//regulation of RNA biosynthetic process//negative regulation of reproductive process//cellular aromatic compound metabolic process//nucleic acid-templated transcription//organic substance metabolic process//transcription, DNA-templated//cellular macromolecule biosynthetic process//seedling development//negative regul…	GO:0005575//GO:0043231//GO:0043227//GO:0043226//GO:0043229//GO:0044424//GO:0005622//GO:0005634//GO:0044464//GO:0005623	cellular_component//intracellular membrane-bounded organelle//membrane-bounded organelle//organelle//intracellular organelle//intracellular part//intracellular//nucleus//cell part//cell	--	--	K11662 actin-related protein 6 | (RefSeq) actin-related protein 6	http://www.genome.jp/dbget-bin/www_bget?sot:102596585	ATARP6	Actin family||Actin-related protein 6
387	PGSC0003DMG400015000	694.623	1450.06	-1.0618	0.0007105	0.0055815	DOWN	GO:0006725//GO:0071704//GO:0008152//GO:0090305//GO:0009987//GO:0008150//GO:0043170//GO:1901360//GO:0006139//GO:0044237//GO:0006807//GO:0090304//GO:0046483//GO:0044238//GO:0034641	cellular aromatic compound metabolic process//organic substance metabolic process//metabolic process//nucleic acid phosphodiester bond hydrolysis//cellular process//biological_process//macromolecule metabolic process//organic cyclic compound metabolic process//nucleobase-containing compound metabolic process//cellular metabolic process//nitrogen compound metabolic process//nucleic acid metabolic …	--	--	GO:0003674//GO:0016787//GO:0004518//GO:0097159//GO:0016788//GO:0003824//GO:1901363//GO:0003676//GO:0005488//GO:0004519	molecular_function//hydrolase activity//nuclease activity//organic cyclic compound binding//hydrolase activity, acting on ester bonds//catalytic activity//heterocyclic compound binding//nucleic acid binding//binding//endonuclease activity	no KO assigned | (RefSeq) uncharacterized LOC102602206	http://www.genome.jp/dbget-bin/www_bget?sot:102602206	-	HNH endonuclease
388	PGSC0003DMG400015161	18.3895	87.5452	-2.2511	0.00017308	0.0017158	DOWN	GO:0044260//GO:1901576//GO:0071704//GO:0034645//GO:0006725//GO:0008152//GO:0006260//GO:0009987//GO:1901362//GO:0044249//GO:0071897//GO:0008150//GO:0019438//GO:0009059//GO:0043170//GO:0044271//GO:1901360//GO:0006139//GO:0044237//GO:0009058//GO:0006807//GO:0044238//GO:0046483//GO:0090304//GO:0034641//GO:0006259//GO:0018130//GO:0034654	cellular macromolecule metabolic process//organic substance biosynthetic process//organic substance metabolic process//cellular macromolecule biosynthetic process//cellular aromatic compound metabolic process//metabolic process//DNA replication//cellular process//organic cyclic compound biosynthetic process//cellular biosynthetic process//DNA biosynthetic process//biological_process//aromatic com…	GO:0005575//GO:0032991//GO:0009360//GO:0042575//GO:1990234//GO:1902494//GO:0061695//GO:0044424//GO:0005622//GO:0044464//GO:0005623	cellular_component//protein-containing complex//DNA polymerase III complex//DNA polymerase complex//transferase complex//catalytic complex//transferase complex, transferring phosphorus-containing groups//intracellular part//intracellular//cell part//cell	GO:0036094//GO:0016779//GO:0003674//GO:0043167//GO:0032555//GO:0035639//GO:0032550//GO:0003887//GO:0005524//GO:0032553//GO:0097159//GO:0016740//GO:1901363//GO:0003676//GO:0030554//GO:0003824//GO:0017076//GO:0097367//GO:1901265//GO:0005488//GO:0032559//GO:0032549//GO:0043168//GO:0016772//GO:0001882//GO:0003677//GO:0034061//GO:0000166//GO:0001883	small molecule binding//nucleotidyltransferase activity//molecular_function//ion binding//purine ribonucleotide binding//purine ribonucleoside triphosphate binding//purine ribonucleoside binding//DNA-directed DNA polymerase activity//ATP binding//ribonucleotide binding//organic cyclic compound binding//transferase activity//heterocyclic compound binding//nucleic acid binding//adenyl nucleotide bi…	no KO assigned | (RefSeq) protein STICHEL-like 2	http://www.genome.jp/dbget-bin/www_bget?sot:102583215	-	AAA+ ATPase domain||P-loop containing nucleoside triphosphate hydrolase||DNA polymerase III, subunit gamma/ tau||DNA polymerase III, clamp loader complex, gamma/delta/delta subunit, C-terminal
389	PGSC0003DMG400015165	1273.72	3247.74	-1.3504	1.0589e-05	0.00015228	DOWN	GO:0008152//GO:0008150	metabolic process//biological_process	GO:0009526//GO:0005575//GO:0043231//GO:0043227//GO:0005737//GO:0009507//GO:0043226//GO:0031975//GO:0009532//GO:0009570//GO:0009536//GO:0044422//GO:0043229//GO:0044446//GO:0044435//GO:0044424//GO:0005622//GO:0009941//GO:0044464//GO:0031967//GO:0044434//GO:0044444//GO:0005623	plastid envelope//cellular_component//intracellular membrane-bounded organelle//membrane-bounded organelle//cytoplasm//chloroplast//organelle//envelope//plastid stroma//chloroplast stroma//plastid//organelle part//intracellular organelle//intracellular organelle part//plastid part//intracellular part//intracellular//chloroplast envelope//cell part//organelle envelope//chloroplast part//cytoplasmi…	GO:0003674//GO:0016787//GO:0003824	molecular_function//hydrolase activity//catalytic activity	no KO assigned | (RefSeq) haloacid dehalogenase-like hydrolase domain-containing protein At3g48420	http://www.genome.jp/dbget-bin/www_bget?sot:102605195	-	HAD-like domain||HAD hydrolase, subfamily IA
390	PGSC0003DMG400015241	6088.33	13694	-1.1694	9.5125e-05	0.0010313	DOWN	GO:0008152//GO:0050790//GO:0045859//GO:0006793//GO:0071704//GO:0031399//GO:0001932//GO:0044260//GO:0051246//GO:0043412//GO:0008150//GO:0050789//GO:0031323//GO:0080090//GO:0009987//GO:0006796//GO:0043549//GO:0044237//GO:0042325//GO:0016310//GO:0019222//GO:0051174//GO:0043170//GO:0032268//GO:0006464//GO:0060255//GO:0050794//GO:0044267//GO:0065007//GO:0065009//GO:0036211//GO:0044238//GO:0006468//GO:…	metabolic process//regulation of catalytic activity//regulation of protein kinase activity//phosphorus metabolic process//organic substance metabolic process//regulation of protein modification process//regulation of protein phosphorylation//cellular macromolecule metabolic process//regulation of protein metabolic process//macromolecule modification//biological_process//regulation of biological p…	GO:0071944//GO:0005575//GO:0030312//GO:0005623//GO:0009505//GO:0005618//GO:0044464	cell periphery//cellular_component//external encapsulating structure//cell//plant-type cell wall//cell wall//cell part	GO:0030234//GO:0003674//GO:0019887//GO:0098772//GO:0019207	enzyme regulator activity//molecular_function//protein kinase regulator activity//molecular function regulator//kinase regulator activity	no KO assigned | (RefSeq) SNF1-related protein kinase regulatory subunit gamma-1	http://www.genome.jp/dbget-bin/www_bget?sot:102584848	KING1	CBS domain
391	PGSC0003DMG400015266	4005.11	8332.78	-1.057	0.00042107	0.0036076	DOWN	--	--	GO:0016020//GO:0005575//GO:0044425//GO:0016021//GO:0031224	membrane//cellular_component//membrane part//integral component of membrane//intrinsic component of membrane	--	--	no KO assigned | (RefSeq) CBS domain-containing protein CBSCBSPB5-like	http://www.genome.jp/dbget-bin/www_bget?sot:102598736	-	CBS domain-containing protein CBSCBSPB||CBS domain||PB1 domain
392	PGSC0003DMG400015370	66.8147	218.444	-1.709	4.3416e-05	0.00052073	DOWN	--	--	--	--	--	--	no KO assigned | (RefSeq) SOSS complex subunit B homolog	http://www.genome.jp/dbget-bin/www_bget?sot:102582449	-	Nucleic acid-binding, OB-fold
393	PGSC0003DMG400015414	136.587	785.995	-2.5247	2.3096e-09	7.3723e-08	DOWN	--	--	--	--	GO:0005509//GO:0043167//GO:0003674//GO:0005488//GO:0046872//GO:0043169	calcium ion binding//ion binding//molecular_function//binding//metal ion binding//cation binding	--	--	-	EF-hand domain pair||EF-hand domain||EF-Hand 1, calcium-binding site
394	PGSC0003DMG400015437	57.7622	234.005	-2.0183	1.9106e-06	3.3216e-05	DOWN	GO:0008150//GO:0008152	biological_process//metabolic process	--	--	GO:0016740//GO:0003824//GO:0016757//GO:0003674//GO:0016758	transferase activity//catalytic activity//transferase activity, transferring glycosyl groups//molecular_function//transferase activity, transferring hexosyl groups	no KO assigned | (RefSeq) UDP-glucose flavonoid 3-O-glucosyltransferase 7-like	http://www.genome.jp/dbget-bin/www_bget?sot:102581928	-	UDP-glucuronosyl/UDP-glucosyltransferase||UDP-glycosyltransferase family, conserved site
395	PGSC0003DMG400015438	257.923	652.807	-1.3397	6.9953e-05	0.00079092	DOWN	GO:0008152//GO:0008150	metabolic process//biological_process	--	--	GO:0003674//GO:0016757//GO:0003824//GO:0016740//GO:0016758	molecular_function//transferase activity, transferring glycosyl groups//catalytic activity//transferase activity//transferase activity, transferring hexosyl groups	no KO assigned | (RefSeq) scopoletin glucosyltransferase-like	http://www.genome.jp/dbget-bin/www_bget?sot:102582257	-	UDP-glycosyltransferase family, conserved site||UDP-glucuronosyl/UDP-glucosyltransferase
396	PGSC0003DMG400015446	59.846	190.439	-1.67	9.8335e-05	0.0010595	DOWN	GO:0008152//GO:0008150	metabolic process//biological_process	--	--	GO:0003674//GO:0016787//GO:0003824	molecular_function//hydrolase activity//catalytic activity	no KO assigned | (RefSeq) probable carboxylesterase 2	http://www.genome.jp/dbget-bin/www_bget?sot:102602233	-	Lipase, GDXG, putative serine active site||Alpha/beta hydrolase fold-3||Alpha/Beta hydrolase fold
397	PGSC0003DMG400015463	834.931	1747.27	-1.0654	0.00052928	0.0043423	DOWN	GO:0044238//GO:0043436//GO:0006807//GO:0019752//GO:0044237//GO:0044281//GO:0009987//GO:0006082//GO:0008150//GO:1901564//GO:0006591//GO:1901605//GO:0071704//GO:0006520//GO:0008152	primary metabolic process//oxoacid metabolic process//nitrogen compound metabolic process//carboxylic acid metabolic process//cellular metabolic process//small molecule metabolic process//cellular process//organic acid metabolic process//biological_process//organonitrogen compound metabolic process//ornithine metabolic process//alpha-amino acid metabolic process//organic substance metabolic proce…	--	--	GO:0016597//GO:0031406//GO:0043168//GO:0016743//GO:0005488//GO:0003824//GO:0004585//GO:0016740//GO:0043177//GO:0043167//GO:0003674//GO:0036094//GO:0016741	amino acid binding//carboxylic acid binding//anion binding//carboxyl- or carbamoyltransferase activity//binding//catalytic activity//ornithine carbamoyltransferase activity//transferase activity//organic acid binding//ion binding//molecular_function//small molecule binding//transferase activity, transferring one-carbon groups	K00611 ornithine carbamoyltransferase [EC:2.1.3.3] | (RefSeq) ornithine carbamoyltransferase, chloroplastic-like	http://www.genome.jp/dbget-bin/www_bget?sot:102591304	-	Aspartate/ornithine carbamoyltransferase||Aspartate/ornithine carbamoyltransferase, carbamoyl-P binding||Ornithine carbamoyltransferase||Aspartate/ornithine carbamoyltransferase, Asp/Orn-binding domain||Ornithine/putrescine carbamoyltransferase
398	PGSC0003DMG400015464	11625.9	68010	-2.5484	1.5951e-09	5.2259e-08	DOWN	GO:0090304//GO:0046483//GO:0044238//GO:0006807//GO:0034641//GO:0043170//GO:0044237//GO:1901360//GO:0006139//GO:0009987//GO:0090305//GO:0008150//GO:0006725//GO:0071704//GO:0008152	nucleic acid metabolic process//heterocycle metabolic process//primary metabolic process//nitrogen compound metabolic process//cellular nitrogen compound metabolic process//macromolecule metabolic process//cellular metabolic process//organic cyclic compound metabolic process//nucleobase-containing compound metabolic process//cellular process//nucleic acid phosphodiester bond hydrolysis//biologica…	GO:0031224//GO:0016021//GO:0044425//GO:0016020//GO:0005575	intrinsic component of membrane//integral component of membrane//membrane part//membrane//cellular_component	GO:0004518//GO:0003824//GO:0016788//GO:0003674//GO:0016787	nuclease activity//catalytic activity//hydrolase activity, acting on ester bonds//molecular_function//hydrolase activity	no KO assigned | (RefSeq) bifunctional nuclease 1-like	http://www.genome.jp/dbget-bin/www_bget?sot:102591631	-	Bifunctional nuclease domain
399	PGSC0003DMG400015481	86.3127	293.049	-1.7635	0.0002219	0.0021159	DOWN	--	--	--	--	--	--	--	--	--	--
400	PGSC0003DMG400015536	1654.83	4921.07	-1.5723	3.8417e-07	8.0506e-06	DOWN	--	--	--	--	GO:0005488//GO:0003677//GO:0003674//GO:0097159//GO:1901363//GO:0003676	binding//DNA binding//molecular_function//organic cyclic compound binding//heterocyclic compound binding//nucleic acid binding	K09422 myb proto-oncogene protein, plant | (RefSeq) transcription factor MYB48	http://www.genome.jp/dbget-bin/www_bget?sot:102586025	-	Myb domain||SANT/Myb domain||Homeobox domain-like
401	PGSC0003DMG400015650	55.3883	147.338	-1.4115	0.0020888	0.013567	DOWN	--	--	--	--	GO:0016746//GO:0003674//GO:0016747//GO:0016740//GO:0003824	transferase activity, transferring acyl groups//molecular_function//transferase activity, transferring acyl groups other than amino-acyl groups//transferase activity//catalytic activity	no KO assigned | (RefSeq) omega-hydroxypalmitate O-feruloyl transferase	http://www.genome.jp/dbget-bin/www_bget?sot:102591601	-	Transferase
402	PGSC0003DMG400015742	1020.56	3119.74	-1.6121	2.4647e-07	5.3852e-06	DOWN	GO:0009605//GO:0009719//GO:0006950//GO:0051716//GO:0051704//GO:0071495//GO:0009725//GO:0010033//GO:0007154//GO:0065007//GO:0009753//GO:0032870//GO:0071395//GO:0050794//GO:0006952//GO:0050896//GO:1901700//GO:0009611//GO:0007165//GO:0070887//GO:0009867//GO:0098542//GO:0042742//GO:0043207//GO:1901701//GO:0009755//GO:0071310//GO:0051707//GO:0042221//GO:0008150//GO:0050789//GO:0009617//GO:0023052//GO:…	response to external stimulus//response to endogenous stimulus//response to stress//cellular response to stimulus//multi-organism process//cellular response to endogenous stimulus//response to hormone//response to organic substance//cell communication//biological regulation//response to jasmonic acid//cellular response to hormone stimulus//cellular response to jasmonic acid stimulus//regulation o…	GO:0044424//GO:0043229//GO:0005623//GO:0005634//GO:0005622//GO:0044464//GO:0005737//GO:0043231//GO:0005575//GO:0043227//GO:0043226	intracellular part//intracellular organelle//cell//nucleus//intracellular//cell part//cytoplasm//intracellular membrane-bounded organelle//cellular_component//membrane-bounded organelle//organelle	GO:0019787//GO:0004842//GO:0003674//GO:0016740//GO:0003824	ubiquitin-like protein transferase activity//ubiquitin-protein transferase activity//molecular_function//transferase activity//catalytic activity	K16280 E3 ubiquitin-protein ligase RGLG [EC:2.3.2.27] | (RefSeq) E3 ubiquitin-protein ligase RGLG2	http://www.genome.jp/dbget-bin/www_bget?sot:102578626	-	von Willebrand factor, type A||Zinc finger, RING-type||Copine
403	PGSC0003DMG400015755	1185.83	2749.83	-1.2134	7.3784e-05	0.0008292	DOWN	--	--	--	--	--	--	no KO assigned | (RefSeq) chaperone protein dnaJ 20, chloroplastic-like	http://www.genome.jp/dbget-bin/www_bget?sot:102582374	-	DnaJ domain||DnaJ domain, conserved site
404	PGSC0003DMG400015797	278.772	566.584	-1.0232	0.0024445	0.015388	DOWN	--	--	--	--	--	--	--	--	--	--
405	PGSC0003DMG400015897	66.8562	331.408	-2.3095	6.9409e-09	2.0226e-07	DOWN	--	--	--	--	--	--	K14496 abscisic acid receptor PYR/PYL family | (RefSeq) abscisic acid receptor PYL4-like	http://www.genome.jp/dbget-bin/www_bget?sot:102591866	-	START-like domain||Polyketide cyclase/dehydrase
406	PGSC0003DMG400015900	1640.91	4081.51	-1.3146	1.3478e-05	0.0001888	DOWN	GO:0008152//GO:0008150//GO:0055114	metabolic process//biological_process//oxidation-reduction process	GO:0016020//GO:0005575//GO:0044425//GO:0016021//GO:0031224	membrane//cellular_component//membrane part//integral component of membrane//intrinsic component of membrane	GO:0003674//GO:0003824//GO:0016651//GO:0016491//GO:0016655	molecular_function//catalytic activity//oxidoreductase activity, acting on NAD(P)H//oxidoreductase activity//oxidoreductase activity, acting on NAD(P)H, quinone or similar compound as acceptor	no KO assigned | (RefSeq) NAD(P)H-quinone oxidoreductase subunit L, chloroplastic	http://www.genome.jp/dbget-bin/www_bget?sot:102600849	CRR23	NAD(P)H-quinone oxidoreductase subunit L
407	PGSC0003DMG400016012	290.665	750.782	-1.369	0.00013462	0.0013844	DOWN	GO:0043170//GO:0016310//GO:0006464//GO:0044237//GO:0006468//GO:0044238//GO:0036211//GO:0019538//GO:0044267//GO:0071704//GO:0044260//GO:0008152//GO:0006793//GO:0009987//GO:0006796//GO:0043412//GO:0008150	macromolecule metabolic process//phosphorylation//cellular protein modification process//cellular metabolic process//protein phosphorylation//primary metabolic process//protein modification process//protein metabolic process//cellular protein metabolic process//organic substance metabolic process//cellular macromolecule metabolic process//metabolic process//phosphorus metabolic process//cellular …	GO:0016021//GO:0044425//GO:0031224//GO:0016020//GO:0005575	integral component of membrane//membrane part//intrinsic component of membrane//membrane//cellular_component	GO:0097367//GO:1901265//GO:0017076//GO:0043168//GO:0005488//GO:0032549//GO:0032559//GO:0016773//GO:0000166//GO:0001883//GO:0004672//GO:0001882//GO:0016772//GO:0043167//GO:0003674//GO:0036094//GO:0016301//GO:0032553//GO:0005524//GO:0035639//GO:0032555//GO:0032550//GO:0097159//GO:1901363//GO:0003824//GO:0030554//GO:0016740	carbohydrate derivative binding//nucleoside phosphate binding//purine nucleotide binding//anion binding//binding//ribonucleoside binding//adenyl ribonucleotide binding//phosphotransferase activity, alcohol group as acceptor//nucleotide binding//purine nucleoside binding//protein kinase activity//nucleoside binding//transferase activity, transferring phosphorus-containing groups//ion binding//mole…	no KO assigned | (RefSeq) proline-rich receptor-like protein kinase PERK9	http://www.genome.jp/dbget-bin/www_bget?sot:102595213	-	Serine/threonine-protein kinase, active site||Protein kinase, ATP binding site||Protein kinase domain||Protein kinase-like domain
408	PGSC0003DMG400016045	103.057	212.366	-1.0431	0.0091187	0.043999	DOWN	--	--	--	--	--	--	--	--	--	--
409	PGSC0003DMG400016062	0.378148	20.8664	-5.7861	0.0020705	0.013472	DOWN	--	--	--	--	--	--	no KO assigned | (RefSeq) myosin-binding protein 2	http://www.genome.jp/dbget-bin/www_bget?sot:102583555	--	--
410	PGSC0003DMG400016131	3014.12	8229.8	-1.4491	1.1774e-06	2.1738e-05	DOWN	GO:0008150//GO:0008152	biological_process//metabolic process	--	--	GO:0003824//GO:0003674	catalytic activity//molecular_function	no KO assigned | (RefSeq) nicotinamidase 1	http://www.genome.jp/dbget-bin/www_bget?sot:102602851	ATNIC1	Isochorismatase-like
411	PGSC0003DMG400016148	4698.55	17624.2	-1.9073	5.9885e-07	1.1898e-05	DOWN	GO:0034654//GO:0060255//GO:0010556//GO:0018130//GO:0050794//GO:0065007//GO:0032774//GO:0010468//GO:0034641//GO:0016070//GO:0090304//GO:0046483//GO:0044238//GO:0009058//GO:0006807//GO:0010467//GO:0044237//GO:0044271//GO:1901360//GO:0006139//GO:0019222//GO:0043170//GO:0009059//GO:0019219//GO:0019438//GO:2000112//GO:0006355//GO:0008150//GO:0031326//GO:0031323//GO:0044249//GO:0050789//GO:0009889//GO:…	nucleobase-containing compound biosynthetic process//regulation of macromolecule metabolic process//regulation of macromolecule biosynthetic process//heterocycle biosynthetic process//regulation of cellular process//biological regulation//RNA biosynthetic process//regulation of gene expression//cellular nitrogen compound metabolic process//RNA metabolic process//nucleic acid metabolic process//he…	GO:0005623//GO:0044464//GO:0005634//GO:0005622//GO:0044424//GO:0043229//GO:0043226//GO:0043227//GO:0043231//GO:0005575	cell//cell part//nucleus//intracellular//intracellular part//intracellular organelle//organelle//membrane-bounded organelle//intracellular membrane-bounded organelle//cellular_component	GO:0003677//GO:0005488//GO:1901363//GO:0003676//GO:0043565//GO:0097159//GO:0003700//GO:0003674	DNA binding//binding//heterocyclic compound binding//nucleic acid binding//sequence-specific DNA binding//organic cyclic compound binding//DNA-binding transcription factor activity//molecular_function	K09338 homeobox-leucine zipper protein | (RefSeq) homeobox-leucine zipper protein ATHB-6	http://www.genome.jp/dbget-bin/www_bget?sot:102586298	-	Homeobox domain||Helix-turn-helix motif||Homeobox domain-like||Homeobox, conserved site||Leucine zipper, homeobox-associated
412	PGSC0003DMG400016154	2326.74	4843.9	-1.0579	0.00038797	0.0033695	DOWN	--	--	--	--	--	--	K17435 large subunit ribosomal protein L54 | (RefSeq) 54S ribosomal protein L37, mitochondrial-like	http://www.genome.jp/dbget-bin/www_bget?sot:102588916	-	Ribosomal protein L37, mitochondrial
413	PGSC0003DMG400016198	44.4874	197.765	-2.1523	1.7373e-06	3.0524e-05	DOWN	GO:0051179//GO:0055085//GO:0009987//GO:0008150//GO:0006810//GO:0051234	localization//transmembrane transport//cellular process//biological_process//transport//establishment of localization	GO:0031224//GO:0044464//GO:0005623//GO:0016021//GO:0044425//GO:0016020//GO:0005886//GO:0005575//GO:0071944	intrinsic component of membrane//cell part//cell//integral component of membrane//membrane part//membrane//plasma membrane//cellular_component//cell periphery	GO:0005215//GO:0003674	transporter activity//molecular_function	no KO assigned | (RefSeq) nucleobase-ascorbate transporter 11	http://www.genome.jp/dbget-bin/www_bget?sot:102601847	-	Xanthine/uracil/vitamin C permease
414	PGSC0003DMG400016302	166.493	334.157	-1.0051	0.0068244	0.035218	DOWN	GO:0009056//GO:0009057//GO:0044248//GO:0009987//GO:0008150//GO:1901564//GO:1901072//GO:0006040//GO:1901136//GO:0046348//GO:0006022//GO:0044260//GO:0005975//GO:0071704//GO:0044036//GO:1901565//GO:0008152//GO:0006807//GO:0006030//GO:1901575//GO:0071554//GO:0044238//GO:1901135//GO:0016998//GO:0043170//GO:0006032//GO:0006026//GO:1901071//GO:0044237	catabolic process//macromolecule catabolic process//cellular catabolic process//cellular process//biological_process//organonitrogen compound metabolic process//glucosamine-containing compound catabolic process//amino sugar metabolic process//carbohydrate derivative catabolic process//amino sugar catabolic process//aminoglycan metabolic process//cellular macromolecule metabolic process//carbohydr…	--	--	GO:0008061//GO:0004568//GO:0003824//GO:0003674//GO:0016787//GO:0004553//GO:0097367//GO:0016798//GO:0005488	chitin binding//chitinase activity//catalytic activity//molecular_function//hydrolase activity//hydrolase activity, hydrolyzing O-glycosyl compounds//carbohydrate derivative binding//hydrolase activity, acting on glycosyl bonds//binding	K01183 chitinase [EC:3.2.1.14] | (RefSeq) endochitinase PR4-like	http://www.genome.jp/dbget-bin/www_bget?sot:102583535	-	Chitin-binding, type 1||Lysozyme-like domain||Glycoside hydrolase, family 19, catalytic||Glycoside hydrolase, family 19||Chitin-binding, type 1, conserved site
415	PGSC0003DMG400016361	705.09	1471.9	-1.0618	0.00055048	0.0044877	DOWN	GO:0009893//GO:0019222//GO:0006662//GO:0048518//GO:0018904//GO:0050794//GO:0065007//GO:0065009//GO:0008152//GO:0050790//GO:0042592//GO:0043085//GO:0071704//GO:0065008//GO:0008150//GO:0050789//GO:0044281//GO:0019725//GO:0009987//GO:0045454//GO:0055114//GO:0044093	positive regulation of metabolic process//regulation of metabolic process//glycerol ether metabolic process//positive regulation of biological process//ether metabolic process//regulation of cellular process//biological regulation//regulation of molecular function//metabolic process//regulation of catalytic activity//homeostatic process//positive regulation of catalytic activity//organic substanc…	GO:0044424//GO:0044435//GO:0043229//GO:0044446//GO:0044422//GO:0044444//GO:0005623//GO:0044434//GO:0044464//GO:0005622//GO:0009507//GO:0005737//GO:0043227//GO:0043231//GO:0005575//GO:0009536//GO:0009570//GO:0009532//GO:0043226	intracellular part//plastid part//intracellular organelle//intracellular organelle part//organelle part//cytoplasmic part//cell//chloroplast part//cell part//intracellular//chloroplast//cytoplasm//membrane-bounded organelle//intracellular membrane-bounded organelle//cellular_component//plastid//chloroplast stroma//plastid stroma//organelle	GO:0098772//GO:0015035//GO:0015036//GO:0016667//GO:0016671//GO:0030234//GO:0003674//GO:0003824//GO:0016491//GO:0008047	molecular function regulator//protein disulfide oxidoreductase activity//disulfide oxidoreductase activity//oxidoreductase activity, acting on a sulfur group of donors//oxidoreductase activity, acting on a sulfur group of donors, disulfide as acceptor//enzyme regulator activity//molecular_function//catalytic activity//oxidoreductase activity//enzyme activator activity	no KO assigned | (RefSeq) thioredoxin X, chloroplastic	http://www.genome.jp/dbget-bin/www_bget?sot:102605867	ATHX	Thioredoxin-like fold||Thioredoxin||Thioredoxin domain
416	PGSC0003DMG400016374	851.196	2296.65	-1.432	4.0078e-06	6.5151e-05	DOWN	--	--	--	--	--	--	no KO assigned | (RefSeq) F-box protein At1g70590-like	http://www.genome.jp/dbget-bin/www_bget?sot:102591124	-	Tetratricopeptide-like helical domain||F-box domain||Sel1-like repeat
417	PGSC0003DMG400016379	564.98	1767.76	-1.6457	2.1892e-07	4.8331e-06	DOWN	--	--	--	--	--	--	no KO assigned | (RefSeq) protein indeterminate-domain 5, chloroplastic-like	http://www.genome.jp/dbget-bin/www_bget?sot:102586049	--	--
418	PGSC0003DMG400016460	879.807	2855.08	-1.6983	4.618e-08	1.1528e-06	DOWN	GO:0006950//GO:0009628//GO:0050896//GO:0009408//GO:0009266//GO:0008150	response to stress//response to abiotic stimulus//response to stimulus//response to heat//response to temperature stimulus//biological_process	--	--	--	--	K13993 HSP20 family protein | (RefSeq) 15.4 kDa class V heat shock protein	http://www.genome.jp/dbget-bin/www_bget?sot:102591787	-	Alpha crystallin/Hsp20 domain||Small heat shock protein HSP20||HSP20-like chaperone
419	PGSC0003DMG400016504	391.456	1984.08	-2.3415	1.0151e-05	0.00014661	DOWN	GO:0008150//GO:0009987//GO:0008152//GO:0015979//GO:0044237	biological_process//cellular process//metabolic process//photosynthesis//cellular metabolic process	GO:0098796//GO:0044436//GO:0009579//GO:0034357//GO:0005575//GO:0016020//GO:0009538//GO:0032991//GO:0009522//GO:0005623//GO:0009521//GO:0005622//GO:0044464//GO:0044425//GO:0044424	membrane protein complex//thylakoid part//thylakoid//photosynthetic membrane//cellular_component//membrane//photosystem I reaction center//protein-containing complex//photosystem I//cell//photosystem//intracellular//cell part//membrane part//intracellular part	--	--	K02695 photosystem I subunit VI | (RefSeq) photosystem I reaction center subunit VI-2, chloroplastic	http://www.genome.jp/dbget-bin/www_bget?sot:102578347	-	Photosystem I PsaH, reaction centre subunit VI||Signal peptide, camelysin
420	PGSC0003DMG400016520	122.965	293.478	-1.255	0.0066022	0.034242	DOWN	--	--	--	--	--	--	no KO assigned | (RefSeq) protein IQ-DOMAIN 14-like	http://www.genome.jp/dbget-bin/www_bget?sot:102600281	-	Domain of unknown function DUF4005
421	PGSC0003DMG400016599	89.592	274.049	-1.613	5.2671e-05	0.00062049	DOWN	--	--	--	--	GO:1901363//GO:0030554//GO:0097159//GO:0032555//GO:0043531//GO:0032550//GO:0032553//GO:0036094//GO:0003674//GO:0043167//GO:0001882//GO:0000166//GO:0001883//GO:0005488//GO:0032549//GO:0032559//GO:0043168//GO:0017076//GO:0097367//GO:1901265	heterocyclic compound binding//adenyl nucleotide binding//organic cyclic compound binding//purine ribonucleotide binding//ADP binding//purine ribonucleoside binding//ribonucleotide binding//small molecule binding//molecular_function//ion binding//nucleoside binding//nucleotide binding//purine nucleoside binding//binding//ribonucleoside binding//adenyl ribonucleotide binding//anion binding//purine…	no KO assigned | (RefSeq) putative late blight resistance protein homolog R1A-3	http://www.genome.jp/dbget-bin/www_bget?sot:102594706	-	Leucine-rich repeat domain, L domain-like||NB-ARC||Winged helix-turn-helix DNA-binding domain
422	PGSC0003DMG400016719	10.4115	63.4558	-2.6076	0.0015363	0.010576	DOWN	--	--	--	--	--	--	no KO assigned | (RefSeq) uncharacterized LOC102602050	http://www.genome.jp/dbget-bin/www_bget?sot:102602050	--	--
423	PGSC0003DMG400016749	290.922	6962.13	-4.5808	3.7454e-06	6.122e-05	DOWN	--	--	--	--	--	--	no KO assigned | (RefSeq) lipoxygenase homology domain-containing protein 1-like	http://www.genome.jp/dbget-bin/www_bget?sot:102600561	-	PLAT/LH2 domain
424	PGSC0003DMG400016843	62.8621	217.85	-1.7931	2.38e-05	0.00030925	DOWN	GO:0051179//GO:0006810//GO:0051234//GO:0008150	localization//transport//establishment of localization//biological_process	GO:0044425//GO:0016021//GO:0031224//GO:0005575//GO:0016020	membrane part//integral component of membrane//intrinsic component of membrane//cellular_component//membrane	--	--	no KO assigned | (RefSeq) mitochondrial substrate carrier family protein ucpB	http://www.genome.jp/dbget-bin/www_bget?sot:102593341	-	Mitochondrial substrate/solute carrier||Mitochondrial carrier domain
425	PGSC0003DMG400017054	738.686	1522.72	-1.0436	0.00083412	0.0063842	DOWN	--	--	--	--	--	--	no KO assigned | (RefSeq) protein-ribulosamine 3-kinase, chloroplastic	http://www.genome.jp/dbget-bin/www_bget?sot:102594708	-	Protein kinase-like domain||Fructosamine/Ketosamine-3-kinase
426	PGSC0003DMG400017167	57.2658	226.256	-1.9822	0.0015709	0.010765	DOWN	GO:0006464//GO:0043170//GO:0016310//GO:0044237//GO:0018193//GO:0019538//GO:0044238//GO:0006468//GO:0036211//GO:0044267//GO:0044260//GO:0071704//GO:0006793//GO:0018108//GO:0008152//GO:0006796//GO:0009987//GO:0018212//GO:0008150//GO:0043412	cellular protein modification process//macromolecule metabolic process//phosphorylation//cellular metabolic process//peptidyl-amino acid modification//protein metabolic process//primary metabolic process//protein phosphorylation//protein modification process//cellular protein metabolic process//cellular macromolecule metabolic process//organic substance metabolic process//phosphorus metabolic pro…	GO:0016021//GO:0044425//GO:0031224//GO:0005575//GO:0016020	integral component of membrane//membrane part//intrinsic component of membrane//cellular_component//membrane	GO:0017076//GO:0097367//GO:1901265//GO:0005488//GO:0032549//GO:0032559//GO:0043168//GO:0016773//GO:0004713//GO:0004672//GO:0001882//GO:0016772//GO:0000166//GO:0001883//GO:0003674//GO:0036094//GO:0043167//GO:0035639//GO:0032555//GO:0032550//GO:0016301//GO:0032553//GO:0005524//GO:0097159//GO:0016740//GO:1901363//GO:0003824//GO:0030554	purine nucleotide binding//carbohydrate derivative binding//nucleoside phosphate binding//binding//ribonucleoside binding//adenyl ribonucleotide binding//anion binding//phosphotransferase activity, alcohol group as acceptor//protein tyrosine kinase activity//protein kinase activity//nucleoside binding//transferase activity, transferring phosphorus-containing groups//nucleotide binding//purine nuc…	no KO assigned | (RefSeq) probable protein kinase At2g41970	http://www.genome.jp/dbget-bin/www_bget?sot:102585511	-	Tyrosine-protein kinase, catalytic domain||Protein kinase domain||Tyrosine-protein kinase, active site||Serine-threonine/tyrosine-protein kinase, catalytic domain||Protein kinase-like domain
427	PGSC0003DMG400017173	28.0542	160.699	-2.5181	3.2266e-06	5.3562e-05	DOWN	GO:0044267//GO:0036211//GO:0044238//GO:0006468//GO:0019538//GO:0044237//GO:0043170//GO:0016310//GO:0006464//GO:0043412//GO:0008150//GO:0009987//GO:0006796//GO:0008152//GO:0006793//GO:0071704//GO:0044260	cellular protein metabolic process//protein modification process//primary metabolic process//protein phosphorylation//protein metabolic process//cellular metabolic process//macromolecule metabolic process//phosphorylation//cellular protein modification process//macromolecule modification//biological_process//cellular process//phosphate-containing compound metabolic process//metabolic process//pho…	--	--	GO:0000166//GO:0001883//GO:0004672//GO:0016772//GO:0001882//GO:0004674//GO:0016773//GO:0043168//GO:0005488//GO:0032559//GO:0032549//GO:0097367//GO:1901265//GO:0017076//GO:1901363//GO:0030554//GO:0003824//GO:0016740//GO:0097159//GO:0016301//GO:0005524//GO:0032553//GO:0032555//GO:0035639//GO:0032550//GO:0043167//GO:0036094//GO:0003674	nucleotide binding//purine nucleoside binding//protein kinase activity//transferase activity, transferring phosphorus-containing groups//nucleoside binding//protein serine/threonine kinase activity//phosphotransferase activity, alcohol group as acceptor//anion binding//binding//adenyl ribonucleotide binding//ribonucleoside binding//carbohydrate derivative binding//nucleoside phosphate binding//pu…	no KO assigned | (RefSeq) phosphoenolpyruvate carboxylase kinase 1-like	http://www.genome.jp/dbget-bin/www_bget?sot:102589245	-	Protein kinase, ATP binding site||Protein kinase domain||Serine/threonine-protein kinase, active site||Protein kinase-like domain
428	PGSC0003DMG400017216	1668.85	5299.6	-1.667	5.574e-08	1.3764e-06	DOWN	--	--	GO:0071944//GO:0005886//GO:0016020//GO:0005575//GO:0005623//GO:0044464	cell periphery//plasma membrane//membrane//cellular_component//cell//cell part	--	--	no KO assigned | (RefSeq) uncharacterized LOC102583985	http://www.genome.jp/dbget-bin/www_bget?sot:102583985	--	--
429	PGSC0003DMG400017347	79.7603	176.316	-1.1444	0.0072167	0.036732	DOWN	--	--	--	--	--	--	no KO assigned | (RefSeq) glucan endo-1,3-beta-glucosidase 12-like	http://www.genome.jp/dbget-bin/www_bget?sot:102601393	-	X8 domain
430	PGSC0003DMG400017452	222.904	460.36	-1.0463	0.0027577	0.016962	DOWN	--	--	--	--	--	--	no KO assigned | (RefSeq) F-box/FBD/LRR-repeat protein At1g13570-like	http://www.genome.jp/dbget-bin/www_bget?sot:102582812	-	Leucine-rich repeat domain, L domain-like||F-box associated domain, type 3||F-box associated interaction domain||F-box domain
431	PGSC0003DMG400017518	17306.6	36044.1	-1.0584	0.00034415	0.0030503	DOWN	--	--	--	--	--	--	no KO assigned | (RefSeq) uncharacterized LOC102599612	http://www.genome.jp/dbget-bin/www_bget?sot:102599612	-	Protein of unknown function DUF597
432	PGSC0003DMG400017542	824.272	1785.11	-1.1148	0.00041633	0.0035721	DOWN	--	--	--	--	GO:0003824//GO:0050662//GO:0003674//GO:0005488//GO:0048037	catalytic activity//coenzyme binding//molecular_function//binding//cofactor binding	no KO assigned | (RefSeq) tetraketide alpha-pyrone reductase 1-like	http://www.genome.jp/dbget-bin/www_bget?sot:102601283	-	NAD-dependent epimerase/dehydratase||Zinc finger, RING/FYVE/PHD-type||Zinc finger, RING-type||NAD(P)-binding domain
433	PGSC0003DMG400017558	61.892	228.496	-1.8843	1.1753e-05	0.00016731	DOWN	GO:0006950//GO:0050896//GO:0008150	response to stress//response to stimulus//biological_process	--	--	--	--	no KO assigned | (RefSeq) uncharacterized LOC102593440	http://www.genome.jp/dbget-bin/www_bget?sot:102593440	-	UspA||Rossmann-like alpha/beta/alpha sandwich fold
434	PGSC0003DMG400017577	2850.67	5716.73	-1.0039	0.00082404	0.0063152	DOWN	GO:0019222//GO:0043170//GO:0019219//GO:0009059//GO:0044237//GO:1901360//GO:0006139//GO:0044271//GO:0090304//GO:0046483//GO:0044238//GO:0006807//GO:0009058//GO:0010467//GO:0034654//GO:0060255//GO:0010556//GO:0018130//GO:0050794//GO:0065007//GO:0032774//GO:0010468//GO:0034641//GO:0016070//GO:0006725//GO:0006351//GO:0034645//GO:0097659//GO:0071704//GO:2001141//GO:0044260//GO:1901576//GO:0051252//GO:…	regulation of metabolic process//macromolecule metabolic process//regulation of nucleobase-containing compound metabolic process//macromolecule biosynthetic process//cellular metabolic process//organic cyclic compound metabolic process//nucleobase-containing compound metabolic process//cellular nitrogen compound biosynthetic process//nucleic acid metabolic process//heterocycle metabolic process//…	--	--	GO:0003700//GO:0003674	DNA-binding transcription factor activity//molecular_function	K20557 transcription factor VIP1 | (RefSeq) transcription factor VIP1-like	http://www.genome.jp/dbget-bin/www_bget?sot:102597510	-	Basic-leucine zipper domain
435	PGSC0003DMG400017587	13.9756	80.9636	-2.5344	0.0049117	0.027038	DOWN	GO:0071704//GO:0010951//GO:0010605//GO:0044260//GO:0044092//GO:0050790//GO:0008152//GO:0010466//GO:0006508//GO:0009987//GO:0080090//GO:0048519//GO:0051246//GO:0043086//GO:0050789//GO:0031323//GO:0008150//GO:0030162//GO:0043170//GO:0019222//GO:0032268//GO:0044237//GO:0051336//GO:0006950//GO:0009892//GO:0044238//GO:0031324//GO:0065009//GO:0009611//GO:0045861//GO:0052547//GO:0019538//GO:0050896//GO:…	organic substance metabolic process//negative regulation of endopeptidase activity//negative regulation of macromolecule metabolic process//cellular macromolecule metabolic process//negative regulation of molecular function//regulation of catalytic activity//metabolic process//negative regulation of peptidase activity//proteolysis//cellular process//regulation of primary metabolic process//negati…	--	--	GO:0061134//GO:0003674//GO:0004866//GO:0030234//GO:0004867//GO:0004857//GO:0098772//GO:0030414//GO:0061135	peptidase regulator activity//molecular_function//endopeptidase inhibitor activity//enzyme regulator activity//serine-type endopeptidase inhibitor activity//enzyme inhibitor activity//molecular function regulator//peptidase inhibitor activity//endopeptidase regulator activity	no KO assigned | (RefSeq) trypsin inhibitor 1-like	http://www.genome.jp/dbget-bin/www_bget?sot:102586688	-	Proteinase inhibitor I13, potato inhibitor I
436	PGSC0003DMG400017600	346.155	804.025	-1.2158	0.00023572	0.0022222	DOWN	--	--	GO:0005575//GO:0016020//GO:0016021//GO:0044425//GO:0031224	cellular_component//membrane//integral component of membrane//membrane part//intrinsic component of membrane	--	--	no KO assigned | (RefSeq) ycf20-like protein	http://www.genome.jp/dbget-bin/www_bget?sot:102592986	-	Uncharacterised protein family Ycf20
437	PGSC0003DMG400017680	364.29	1643.42	-2.1735	5.2346e-09	1.5636e-07	DOWN	GO:0008150//GO:0043412//GO:0006796//GO:0009987//GO:0018212//GO:0006793//GO:0008152//GO:0018108//GO:0044260//GO:0071704//GO:0044267//GO:0019538//GO:0006468//GO:0044238//GO:0036211//GO:0018193//GO:0044237//GO:0006464//GO:0016310//GO:0043170	biological_process//macromolecule modification//phosphate-containing compound metabolic process//cellular process//peptidyl-tyrosine modification//phosphorus metabolic process//metabolic process//peptidyl-tyrosine phosphorylation//cellular macromolecule metabolic process//organic substance metabolic process//cellular protein metabolic process//protein metabolic process//protein phosphorylation//p…	GO:0005575//GO:0016020//GO:0031224//GO:0044425//GO:0016021	cellular_component//membrane//intrinsic component of membrane//membrane part//integral component of membrane	GO:0016740//GO:0003824//GO:0030554//GO:1901363//GO:0097159//GO:0032550//GO:0035639//GO:0032555//GO:0032553//GO:0005524//GO:0016301//GO:0003674//GO:0036094//GO:0043167//GO:0001882//GO:0016772//GO:0004672//GO:0001883//GO:0000166//GO:0004713//GO:0016773//GO:0004674//GO:0032549//GO:0032559//GO:0005488//GO:0043168//GO:0017076//GO:1901265//GO:0097367	transferase activity//catalytic activity//adenyl nucleotide binding//heterocyclic compound binding//organic cyclic compound binding//purine ribonucleoside binding//purine ribonucleoside triphosphate binding//purine ribonucleotide binding//ribonucleotide binding//ATP binding//kinase activity//molecular_function//small molecule binding//ion binding//nucleoside binding//transferase activity, transfe…	K04733 interleukin-1 receptor-associated kinase 4 [EC:2.7.11.1] | (RefSeq) probable receptor-like protein kinase At1g80640	http://www.genome.jp/dbget-bin/www_bget?sot:102590145	-	Serine/threonine-protein kinase, active site||Protein kinase domain||Protein kinase, ATP binding site||Tyrosine-protein kinase, catalytic domain||Protein kinase-like domain||Serine-threonine/tyrosine-protein kinase, catalytic domain
438	PGSC0003DMG400017908	935.704	2062.61	-1.1403	0.00021445	0.0020582	DOWN	--	--	--	--	--	--	no KO assigned | (RefSeq) pentatricopeptide repeat-containing protein At4g21065-like	http://www.genome.jp/dbget-bin/www_bget?sot:102604723	-	Protein of unknown function DUF789
439	PGSC0003DMG400017986	2053.08	4176.83	-1.0246	0.0007857	0.0060745	DOWN	GO:0044248//GO:0031668//GO:0009987//GO:0006623//GO:0072665//GO:0033554//GO:0009056//GO:0007034//GO:0009267//GO:0009607//GO:0046907//GO:0033365//GO:0031669//GO:0009856//GO:0006810//GO:0006605//GO:0051234//GO:0008150//GO:0006914//GO:0071496//GO:0044706//GO:0051649//GO:0034613//GO:0051707//GO:0070925//GO:0033036//GO:0008152//GO:0043207//GO:0051641//GO:0071702//GO:0050832//GO:0009991//GO:0009620//GO:…	cellular catabolic process//cellular response to extracellular stimulus//cellular process//protein targeting to vacuole//protein localization to vacuole//cellular response to stress//catabolic process//vacuolar transport//cellular response to starvation//response to biotic stimulus//intracellular transport//protein localization to organelle//cellular response to nutrient levels//pollination//tran…	GO:0005575//GO:0005737//GO:0000407//GO:0044464//GO:0005622//GO:0044444//GO:0005623//GO:0044424	cellular_component//cytoplasm//phagophore assembly site//cell part//intracellular//cytoplasmic part//cell//intracellular part	--	--	K08334 beclin | (RefSeq) atg6; beclin-1-like protein-like	http://www.genome.jp/dbget-bin/www_bget?sot:102603263	BECLIN1	Atg6/Beclin
440	PGSC0003DMG400018073	192.529	409.384	-1.0884	0.0025309	0.015831	DOWN	--	--	--	--	--	--	no KO assigned | (RefSeq) nitrile-specifier protein 5	http://www.genome.jp/dbget-bin/www_bget?sot:102590744	-	Galactose oxidase/kelch, beta-propeller||Kelch-type beta propeller
441	PGSC0003DMG400018114	1529.99	4272.76	-1.4816	3.3473e-06	5.535e-05	DOWN	GO:0055114//GO:0008150//GO:0008152	oxidation-reduction process//biological_process//metabolic process	GO:0031224//GO:0044464//GO:0005622//GO:0005623//GO:0044444//GO:0016021//GO:0043229//GO:0044425//GO:0044424//GO:0043226//GO:0043227//GO:0005886//GO:0016020//GO:0005739//GO:0005575//GO:0043231//GO:0005737//GO:0071944	intrinsic component of membrane//cell part//intracellular//cell//cytoplasmic part//integral component of membrane//intracellular organelle//membrane part//intracellular part//organelle//membrane-bounded organelle//plasma membrane//membrane//mitochondrion//cellular_component//intracellular membrane-bounded organelle//cytoplasm//cell periphery	GO:0016722//GO:0016723//GO:0000293//GO:0003824//GO:0016491//GO:0003674	oxidoreductase activity, oxidizing metal ions//oxidoreductase activity, oxidizing metal ions, NAD or NADP as acceptor//ferric-chelate reductase activity//catalytic activity//oxidoreductase activity//molecular_function	K00521 ferric-chelate reductase [EC:1.16.1.7] | (RefSeq) ferric reduction oxidase 8, mitochondrial	http://www.genome.jp/dbget-bin/www_bget?sot:102579721	ATFRO8	Ferric reductase transmembrane component-like domain||FAD-binding 8||Cytochrome b245, heavy chain||Ferredoxin reductase-type FAD-binding domain||-||Ferric reductase, NAD binding domain||Riboflavin synthase-like beta-barrel
442	PGSC0003DMG400018183	559.467	1290.44	-1.2057	0.00012146	0.0012701	DOWN	GO:0050896//GO:0006950//GO:0008150	response to stimulus//response to stress//biological_process	--	--	--	--	no KO assigned | (RefSeq) uncharacterized LOC102579185	http://www.genome.jp/dbget-bin/www_bget?sot:102579185	-	Rossmann-like alpha/beta/alpha sandwich fold||UspA
443	PGSC0003DMG400018222	222.372	553.076	-1.3145	0.00015401	0.0015548	DOWN	GO:0006284//GO:0043170//GO:0006139//GO:1901360//GO:0044237//GO:0051716//GO:0006974//GO:0006950//GO:0006807//GO:0044238//GO:0046483//GO:0090304//GO:0034641//GO:0006259//GO:0050896//GO:0044260//GO:0071704//GO:0006725//GO:0008152//GO:0033554//GO:0006281//GO:0009987//GO:0008150	base-excision repair//macromolecule metabolic process//nucleobase-containing compound metabolic process//organic cyclic compound metabolic process//cellular metabolic process//cellular response to stimulus//cellular response to DNA damage stimulus//response to stress//nitrogen compound metabolic process//primary metabolic process//heterocycle metabolic process//nucleic acid metabolic process//cel…	--	--	GO:0003674//GO:0003824	molecular_function//catalytic activity	no KO assigned | (RefSeq) uncharacterized LOC102593287	http://www.genome.jp/dbget-bin/www_bget?sot:102593287	-	HhH-GPD domain||DNA glycosylase
444	PGSC0003DMG400018263	267.148	660.995	-1.307	9.7747e-05	0.0010539	DOWN	GO:0036211//GO:0006468//GO:0044238//GO:0019538//GO:0044267//GO:0016310//GO:0043170//GO:0006464//GO:0044237//GO:0009987//GO:0006796//GO:0043412//GO:0008150//GO:0071704//GO:0044260//GO:0008152//GO:0006793	protein modification process//protein phosphorylation//primary metabolic process//protein metabolic process//cellular protein metabolic process//phosphorylation//macromolecule metabolic process//cellular protein modification process//cellular metabolic process//cellular process//phosphate-containing compound metabolic process//macromolecule modification//biological_process//organic substance meta…	GO:0031224//GO:0016021//GO:0044425//GO:0016020//GO:0005575	intrinsic component of membrane//integral component of membrane//membrane part//membrane//cellular_component	GO:0016773//GO:0001883//GO:0000166//GO:0016772//GO:0001882//GO:0004672//GO:1901265//GO:0097367//GO:0017076//GO:0043168//GO:0032559//GO:0032549//GO:0005488//GO:0097159//GO:0030554//GO:0003824//GO:1901363//GO:0016740//GO:0043167//GO:0036094//GO:0003674//GO:0005524//GO:0032553//GO:0016301//GO:0032550//GO:0032555//GO:0035639	phosphotransferase activity, alcohol group as acceptor//purine nucleoside binding//nucleotide binding//transferase activity, transferring phosphorus-containing groups//nucleoside binding//protein kinase activity//nucleoside phosphate binding//carbohydrate derivative binding//purine nucleotide binding//anion binding//adenyl ribonucleotide binding//ribonucleoside binding//binding//organic cyclic co…	no KO assigned | (RefSeq) probable leucine-rich repeat receptor-like protein kinase At5g49770	http://www.genome.jp/dbget-bin/www_bget?sot:102592051	-	Serine/threonine-protein kinase, active site||Leucine-rich repeat domain, L domain-like||Protein kinase, ATP binding site||Protein kinase domain||Protein kinase-like domain||Serine-threonine/tyrosine-protein kinase, catalytic domain
445	PGSC0003DMG400018330	5352.67	12565.8	-1.2312	3.2249e-05	0.00040252	DOWN	GO:0009657//GO:0033036//GO:0046700//GO:0045038//GO:0006778//GO:0015996//GO:0009743//GO:0019439//GO:0070271//GO:0051649//GO:0034613//GO:0071704//GO:0010207//GO:0048583//GO:0006725//GO:0071310//GO:0033013//GO:0071322//GO:0009756//GO:0048522//GO:0051641//GO:0071702//GO:1901701//GO:0042440//GO:0015979//GO:1901565//GO:0033015//GO:0008152//GO:2000377//GO:0010027//GO:2000070//GO:0061024//GO:0065002//GO:…	plastid organization//macromolecule localization//heterocycle catabolic process//protein import into chloroplast thylakoid membrane//porphyrin-containing compound metabolic process//chlorophyll catabolic process//response to carbohydrate//aromatic compound catabolic process//obsolete protein complex biogenesis//establishment of localization in cell//cellular protein localization//organic substanc…	GO:0043231//GO:0098805//GO:0005575//GO:0009526//GO:0098588//GO:0031968//GO:0016020//GO:0043227//GO:0031984//GO:0009707//GO:0009507//GO:0005737//GO:0034357//GO:0009579//GO:0043226//GO:0031975//GO:0009532//GO:0031976//GO:0009570//GO:0042170//GO:0009536//GO:0044436//GO:0043229//GO:0044446//GO:0044422//GO:0016021//GO:0009535//GO:0031090//GO:0044435//GO:0031969//GO:0042651//GO:0055035//GO:0044424//GO:…	intracellular membrane-bounded organelle//whole membrane//cellular_component//plastid envelope//bounding membrane of organelle//organelle outer membrane//membrane//membrane-bounded organelle//organelle subcompartment//chloroplast outer membrane//chloroplast//cytoplasm//photosynthetic membrane//thylakoid//organelle//envelope//plastid stroma//plastid thylakoid//chloroplast stroma//plastid membrane/…	--	--	no KO assigned | (RefSeq) THF1; light-regulated chloroplast-localized protein	http://www.genome.jp/dbget-bin/www_bget?sot:102577610	-	Protein Thf1
446	PGSC0003DMG400018334	1034.41	2183.73	-1.078	0.00049757	0.004138	DOWN	--	--	--	--	--	--	--	--	-	Protein SirB1, N-terminal
447	PGSC0003DMG400018367	1911.66	4182.94	-1.1297	0.0001702	0.0016942	DOWN	GO:0006464//GO:0043170//GO:0016310//GO:0044237//GO:0019538//GO:0036211//GO:0044238//GO:0006468//GO:0044267//GO:0044260//GO:0071704//GO:0006793//GO:0008152//GO:0006796//GO:0009987//GO:0008150//GO:0043412	cellular protein modification process//macromolecule metabolic process//phosphorylation//cellular metabolic process//protein metabolic process//protein modification process//primary metabolic process//protein phosphorylation//cellular protein metabolic process//cellular macromolecule metabolic process//organic substance metabolic process//phosphorus metabolic process//metabolic process//phosphate…	GO:0016021//GO:0044425//GO:0031224//GO:0005575//GO:0016020	integral component of membrane//membrane part//intrinsic component of membrane//cellular_component//membrane	GO:0017076//GO:0097367//GO:1901265//GO:0005488//GO:0032559//GO:0032549//GO:0043168//GO:0016773//GO:0004672//GO:0016772//GO:0001882//GO:0000166//GO:0001883//GO:0036094//GO:0003674//GO:0043167//GO:0032555//GO:0035639//GO:0032550//GO:0016301//GO:0005524//GO:0032553//GO:0097159//GO:0016740//GO:1901363//GO:0030554//GO:0003824	purine nucleotide binding//carbohydrate derivative binding//nucleoside phosphate binding//binding//adenyl ribonucleotide binding//ribonucleoside binding//anion binding//phosphotransferase activity, alcohol group as acceptor//protein kinase activity//transferase activity, transferring phosphorus-containing groups//nucleoside binding//nucleotide binding//purine nucleoside binding//small molecule bi…	no KO assigned | (RefSeq) LRR receptor-like kinase	http://www.genome.jp/dbget-bin/www_bget?sot:102577903	-	Protein kinase domain||Leucine-rich repeat||Leucine-rich repeat domain, L domain-like||Serine-threonine/tyrosine-protein kinase, catalytic domain||Protein kinase-like domain
448	PGSC0003DMG400018373	10607.5	26225.3	-1.3059	1.3222e-05	0.00018574	DOWN	--	--	--	--	--	--	--	--	-	Protein of unknown function wound-induced
449	PGSC0003DMG400018408	314.876	1561.57	-2.3101	1.7168e-12	9.4024e-11	DOWN	GO:1903506//GO:0051252//GO:0008152//GO:2001141//GO:0044260//GO:1901576//GO:0006725//GO:0006351//GO:0034645//GO:0097659//GO:0071704//GO:0006355//GO:0008150//GO:0031326//GO:2000112//GO:0009889//GO:0031323//GO:0044249//GO:0050789//GO:0019438//GO:0080090//GO:1901362//GO:0051171//GO:0009987//GO:1901360//GO:0006139//GO:0044271//GO:0044237//GO:0019219//GO:0009059//GO:0019222//GO:0043170//GO:0065007//GO:…	regulation of nucleic acid-templated transcription//regulation of RNA metabolic process//metabolic process//regulation of RNA biosynthetic process//cellular macromolecule metabolic process//organic substance biosynthetic process//cellular aromatic compound metabolic process//transcription, DNA-templated//cellular macromolecule biosynthetic process//nucleic acid-templated transcription//organic su…	GO:0005575//GO:0043231//GO:0043227//GO:0043226//GO:0044424//GO:0043229//GO:0005623//GO:0005622//GO:0005634//GO:0044464	cellular_component//intracellular membrane-bounded organelle//membrane-bounded organelle//organelle//intracellular part//intracellular organelle//cell//intracellular//nucleus//cell part	GO:0003674//GO:0003676//GO:1901363//GO:0097159//GO:0005488//GO:0003677	molecular_function//nucleic acid binding//heterocyclic compound binding//organic cyclic compound binding//binding//DNA binding	no KO assigned | (RefSeq) CDF1.2; cyclic dof factor 1	http://www.genome.jp/dbget-bin/www_bget?sot:102603307	-	Zinc finger, Dof-type
450	PGSC0003DMG400018417	9.20518	100.487	-3.4484	3.7905e-08	9.6565e-07	DOWN	GO:0008150//GO:0008152	biological_process//metabolic process	--	--	GO:0016740//GO:0003824//GO:0016757//GO:0003674//GO:0016758	transferase activity//catalytic activity//transferase activity, transferring glycosyl groups//molecular_function//transferase activity, transferring hexosyl groups	K21373 7-deoxyloganetic acid glucosyltransferase [EC:2.4.1.323] | (RefSeq) 7-deoxyloganetic acid glucosyltransferase-like	http://www.genome.jp/dbget-bin/www_bget?sot:102593704	-	UDP-glycosyltransferase family, conserved site||UDP-glucuronosyl/UDP-glucosyltransferase
451	PGSC0003DMG400018422	1902.51	5091.32	-1.4201	2.0941e-06	3.6069e-05	DOWN	GO:1902358//GO:0006810//GO:0051234//GO:0008150//GO:0009987//GO:0008272//GO:0015698//GO:0034220//GO:0098660//GO:0072348//GO:0098661//GO:0098656//GO:0051179//GO:0006820//GO:0055085//GO:0006811	sulfate transmembrane transport//transport//establishment of localization//biological_process//cellular process//sulfate transport//inorganic anion transport//ion transmembrane transport//inorganic ion transmembrane transport//sulfur compound transport//inorganic anion transmembrane transport//anion transmembrane transport//localization//anion transport//transmembrane transport//ion transport	GO:0005575//GO:0016020//GO:0031224//GO:0044425//GO:0016021	cellular_component//membrane//intrinsic component of membrane//membrane part//integral component of membrane	GO:0022857//GO:0015103//GO:1901682//GO:0003674//GO:0015291//GO:0015075//GO:0005215//GO:0022804//GO:0008509//GO:0008271//GO:0015116	transmembrane transporter activity//inorganic anion transmembrane transporter activity//sulfur compound transmembrane transporter activity//molecular_function//secondary active transmembrane transporter activity//ion transmembrane transporter activity//transporter activity//active transmembrane transporter activity//anion transmembrane transporter activity//secondary active sulfate transmembrane …	K17471 sulfate transporter 3 | (RefSeq) probable sulfate transporter 3.3	http://www.genome.jp/dbget-bin/www_bget?sot:102599294	AST91	SLC26A/SulP transporter domain||STAS domain||Sulfate transporter 3.3||Sulphate anion transporter, conserved site||SLC26A/SulP transporter
452	PGSC0003DMG400018425	112.831	236.579	-1.0682	0.006601	0.034242	DOWN	GO:0044237//GO:0043043//GO:0044271//GO:0043170//GO:0009059//GO:0044267//GO:0034641//GO:0006412//GO:0044238//GO:0006807//GO:0009058//GO:0019538//GO:0010467//GO:0043603//GO:0008152//GO:0006518//GO:0071704//GO:0034645//GO:0043604//GO:0044260//GO:1901576//GO:1901564//GO:0008150//GO:1901566//GO:0044249//GO:0009987	cellular metabolic process//peptide biosynthetic process//cellular nitrogen compound biosynthetic process//macromolecule metabolic process//macromolecule biosynthetic process//cellular protein metabolic process//cellular nitrogen compound metabolic process//translation//primary metabolic process//nitrogen compound metabolic process//biosynthetic process//protein metabolic process//gene expression…	GO:0044424//GO:0043232//GO:0043229//GO:0005623//GO:0044444//GO:0043228//GO:0044464//GO:0005622//GO:0005737//GO:0005840//GO:0032991//GO:0005575//GO:0043226	intracellular part//intracellular non-membrane-bounded organelle//intracellular organelle//cell//cytoplasmic part//non-membrane-bounded organelle//cell part//intracellular//cytoplasm//ribosome//protein-containing complex//cellular_component//organelle	GO:0003674//GO:0005198//GO:0003735	molecular_function//structural molecule activity//structural constituent of ribosome	no KO assigned | (RefSeq) 50S ribosomal protein L18	http://www.genome.jp/dbget-bin/www_bget?sot:102602294	-	Ribosomal protein L18
453	PGSC0003DMG400018517	19789.6	51263.9	-1.3732	2.4484e-05	0.0003162	DOWN	--	--	--	--	GO:0005488//GO:0046872//GO:0043169//GO:0003674//GO:0043167	binding//metal ion binding//cation binding//molecular_function//ion binding	no KO assigned | (RefSeq) protein yippee-like At4g27740	http://www.genome.jp/dbget-bin/www_bget?sot:102590658	-	Yippee/Mis18/Cereblon||Yippee domain
454	PGSC0003DMG400018518	313.633	814.121	-1.3762	0.0001531	0.0015472	DOWN	--	--	--	--	GO:0046872//GO:0005488//GO:0043169//GO:0043167//GO:0003674	metal ion binding//binding//cation binding//ion binding//molecular_function	no KO assigned | (RefSeq) protein yippee-like At4g27745	http://www.genome.jp/dbget-bin/www_bget?sot:102591011	-	Yippee/Mis18/Cereblon||Yippee domain
455	PGSC0003DMG400018545	2249.33	4686.2	-1.0589	0.00041097	0.0035343	DOWN	GO:0044237//GO:0006470//GO:0043170//GO:0006464//GO:0044267//GO:0044238//GO:0036211//GO:0016311//GO:0019538//GO:0008152//GO:0006793//GO:0071704//GO:0044260//GO:0043412//GO:0008150//GO:0009987//GO:0006796	cellular metabolic process//protein dephosphorylation//macromolecule metabolic process//cellular protein modification process//cellular protein metabolic process//primary metabolic process//protein modification process//dephosphorylation//protein metabolic process//metabolic process//phosphorus metabolic process//organic substance metabolic process//cellular macromolecule metabolic process//macro…	--	--	GO:0005488//GO:0046872//GO:0042578//GO:0043169//GO:0004721//GO:0016787//GO:0043167//GO:0016791//GO:0003674//GO:0003824//GO:0004722//GO:0016788	binding//metal ion binding//phosphoric ester hydrolase activity//cation binding//phosphoprotein phosphatase activity//hydrolase activity//ion binding//phosphatase activity//molecular_function//catalytic activity//protein serine/threonine phosphatase activity//hydrolase activity, acting on ester bonds	K04457 protein phosphatase 1A [EC:3.1.3.16] | (RefSeq) protein phosphatase 2C 57	http://www.genome.jp/dbget-bin/www_bget?sot:102595551	TAP38	PPM-type phosphatase domain||PPM-type phosphatase, divalent cation binding||Protein phosphatase 2C family
456	PGSC0003DMG400018551	1107.06	2433.92	-1.1366	0.00020647	0.0019918	DOWN	GO:0051179//GO:0006810//GO:0051234//GO:0008150	localization//transport//establishment of localization//biological_process	GO:0031224//GO:0016021//GO:0044425//GO:0005575//GO:0016020	intrinsic component of membrane//integral component of membrane//membrane part//cellular_component//membrane	--	--	no KO assigned | (RefSeq) probable VAMP-like protein At1g33475	http://www.genome.jp/dbget-bin/www_bget?sot:102599714	-	Longin-like domain
457	PGSC0003DMG400018618	400.524	1589.41	-1.9885	9.2239e-06	0.00013479	DOWN	GO:0055085//GO:0042493//GO:0050896//GO:0051179//GO:0008150//GO:0042221//GO:0006810//GO:0051234//GO:0015893//GO:0006855//GO:0009987	transmembrane transport//response to drug//response to stimulus//localization//biological_process//response to chemical//transport//establishment of localization//drug transport//drug transmembrane transport//cellular process	GO:0044425//GO:0016021//GO:0031224//GO:0005575//GO:0016020	membrane part//integral component of membrane//intrinsic component of membrane//cellular_component//membrane	GO:0022804//GO:0005215//GO:0015297//GO:0003674//GO:0015291//GO:0022857//GO:0015238	active transmembrane transporter activity//transporter activity//antiporter activity//molecular_function//secondary active transmembrane transporter activity//transmembrane transporter activity//drug transmembrane transporter activity	K03327 multidrug resistance protein, MATE family | (RefSeq) protein DETOXIFICATION 29-like	http://www.genome.jp/dbget-bin/www_bget?sot:102583997	-	Multi antimicrobial extrusion protein
458	PGSC0003DMG400018641	1909.86	4476.37	-1.2289	0.0024843	0.015579	DOWN	GO:1901576//GO:0071704//GO:0008152//GO:0008610//GO:1901362//GO:0008150//GO:0006694//GO:1901360//GO:0032259//GO:0009058//GO:0044238//GO:0006629//GO:0008202	organic substance biosynthetic process//organic substance metabolic process//metabolic process//lipid biosynthetic process//organic cyclic compound biosynthetic process//biological_process//steroid biosynthetic process//organic cyclic compound metabolic process//methylation//biosynthetic process//primary metabolic process//lipid metabolic process//steroid metabolic process	--	--	GO:0003674//GO:0008168//GO:0016741//GO:0016740//GO:0003824	molecular_function//methyltransferase activity//transferase activity, transferring one-carbon groups//transferase activity//catalytic activity	K08242 24-methylenesterol C-methyltransferase [EC:2.1.1.143] | (RefSeq) 24-methylenesterol C-methyltransferase 2-like	http://www.genome.jp/dbget-bin/www_bget?sot:102596628	-	SAM-dependent methyltransferase SMT-type||S-adenosyl-L-methionine-dependent methyltransferase||Methyltransferase type 11||Sterol methyltransferase C-terminal
459	PGSC0003DMG400018652	204.085	459.906	-1.1722	0.00093449	0.0070075	DOWN	--	--	--	--	GO:0097159//GO:0003676//GO:1901363//GO:0003674//GO:0003723//GO:0005488	organic cyclic compound binding//nucleic acid binding//heterocyclic compound binding//molecular_function//RNA binding//binding	K14785 ESF2/ABP1 family protein | (RefSeq) pre-rRNA-processing protein ESF2-like	http://www.genome.jp/dbget-bin/www_bget?sot:102591887	-	RNA recognition motif domain||ABT1/ESF2, RNA recognition motif
460	PGSC0003DMG400018833	1238.28	2763.27	-1.158	0.00012776	0.0013248	DOWN	--	--	GO:0031224//GO:0016021//GO:0044425//GO:0016020//GO:0005575	intrinsic component of membrane//integral component of membrane//membrane part//membrane//cellular_component	--	--	no KO assigned | (RefSeq) uncharacterized LOC102594065	http://www.genome.jp/dbget-bin/www_bget?sot:102594065	--	--
461	PGSC0003DMG400018857	192.504	1354.82	-2.8151	8.4772e-17	8.1177e-15	DOWN	--	--	--	--	--	--	no KO assigned | (RefSeq) uncharacterized LOC102592161	http://www.genome.jp/dbget-bin/www_bget?sot:102592161	--	--
462	PGSC0003DMG400018922	257.956	531.078	-1.0418	0.0022752	0.014528	DOWN	--	--	--	--	--	--	no KO assigned | (RefSeq) F-box/kelch-repeat protein SKIP25-like	http://www.genome.jp/dbget-bin/www_bget?sot:102603146	-	F-box domain||Kelch-type beta propeller
463	PGSC0003DMG400019000	76.0448	248.696	-1.7095	3.8445e-05	0.00046808	DOWN	--	--	--	--	--	--	no KO assigned | (RefSeq) BTB/POZ domain-containing protein At3g19850-like	http://www.genome.jp/dbget-bin/www_bget?sot:102585563	-	NPH3 domain||SKP1/BTB/POZ domain||BTB/POZ domain
464	PGSC0003DMG400019033	18279.5	39651.6	-1.1172	0.0022837	0.014573	DOWN	GO:0043170//GO:0019538//GO:0044238//GO:0006508//GO:0008152//GO:0071704//GO:0008150	macromolecule metabolic process//protein metabolic process//primary metabolic process//proteolysis//metabolic process//organic substance metabolic process//biological_process	--	--	GO:0008233//GO:0016787//GO:0008234//GO:0003674//GO:0003824//GO:0070011	peptidase activity//hydrolase activity//cysteine-type peptidase activity//molecular_function//catalytic activity//peptidase activity, acting on L-amino acid peptides	K01366 cathepsin H [EC:3.4.22.16] | (RefSeq) cysteine proteinase 3	http://www.genome.jp/dbget-bin/www_bget?sot:102578939	-	Peptidase C1A||Cathepsin propeptide inhibitor domain (I29)||Cysteine peptidase, cysteine active site||Cysteine peptidase, histidine active site||Cysteine peptidase, asparagine active site||Peptidase C1A, papain C-terminal
465	PGSC0003DMG400019126	118.166	294.91	-1.3195	0.00045349	0.0038259	DOWN	--	--	GO:0005575//GO:0016020//GO:0044425//GO:0016021//GO:0031224	cellular_component//membrane//membrane part//integral component of membrane//intrinsic component of membrane	--	--	K01988 lactosylceramide 4-alpha-galactosyltransferase [EC:2.4.1.228] | (RefSeq) lactosylceramide 4-alpha-galactosyltransferase-like	http://www.genome.jp/dbget-bin/www_bget?sot:102584175	-	Alpha 1,4-glycosyltransferase domain||Glycosyltransferase, DXD sugar-binding motif||Nucleotide-diphospho-sugar transferases
466	PGSC0003DMG400019141	141.326	738.327	-2.3852	0.0024637	0.01547	DOWN	--	--	--	--	--	--	K20929 glyoxal/methylglyoxal oxidase [EC:1.2.3.15] | (RefSeq) galactose oxidase	http://www.genome.jp/dbget-bin/www_bget?sot:102594566	-	Galactose oxidase-like, Early set domain||Immunoglobulin E-set||Immunoglobulin-like fold||Glyoxal oxidase, N-terminal||Galactose oxidase, beta-propeller||Galactose oxidase/kelch, beta-propeller
467	PGSC0003DMG400019182	56.5251	259.456	-2.1985	1.357e-07	3.1375e-06	DOWN	--	--	GO:0031224//GO:0016021//GO:0044425//GO:0005575//GO:0016020	intrinsic component of membrane//integral component of membrane//membrane part//cellular_component//membrane	--	--	K13946 auxin influx carrier (AUX1 LAX family) | (RefSeq) auxin transporter-like protein 4	http://www.genome.jp/dbget-bin/www_bget?sot:102586608	-	Amino acid transporter, transmembrane domain
468	PGSC0003DMG400019188	239.586	1820.65	-2.9258	4.5307e-13	2.7203e-11	DOWN	GO:0044238//GO:0016311//GO:0044237//GO:0009987//GO:0006796//GO:0008150//GO:0071704//GO:0005975//GO:0008152//GO:0006793	primary metabolic process//dephosphorylation//cellular metabolic process//cellular process//phosphate-containing compound metabolic process//biological_process//organic substance metabolic process//carbohydrate metabolic process//metabolic process//phosphorus metabolic process	--	--	GO:0042578//GO:0003824//GO:0019203//GO:0016788//GO:0050308//GO:0016791//GO:0003674//GO:0016787//GO:0042132	phosphoric ester hydrolase activity//catalytic activity//carbohydrate phosphatase activity//hydrolase activity, acting on ester bonds//sugar-phosphatase activity//phosphatase activity//molecular_function//hydrolase activity//fructose 1,6-bisphosphate 1-phosphatase activity	K03841 fructose-1,6-bisphosphatase I [EC:3.1.3.11] | (RefSeq) fructose-1,6-bisphosphatase, chloroplastic-like	http://www.genome.jp/dbget-bin/www_bget?sot:102590424	-	Fructose-1-6-bisphosphatase class I, N-terminal||Fructose-1,6-bisphosphatase class 1||Fructose-1,6-bisphosphatase
469	PGSC0003DMG400019319	33.4124	126.618	-1.922	0.0063479	0.033242	DOWN	GO:0044237//GO:0044255//GO:0006644//GO:0046486//GO:0006629//GO:0044238//GO:0046488//GO:0016311//GO:0030258//GO:0008152//GO:0046856//GO:0006793//GO:0071704//GO:0006650//GO:0046839//GO:0008150//GO:0009987//GO:0006796//GO:0019637	cellular metabolic process//cellular lipid metabolic process//phospholipid metabolic process//glycerolipid metabolic process//lipid metabolic process//primary metabolic process//phosphatidylinositol metabolic process//dephosphorylation//lipid modification//metabolic process//phosphatidylinositol dephosphorylation//phosphorus metabolic process//organic substance metabolic process//glycerophospholi…	--	--	GO:0016787//GO:0003674//GO:0003824	hydrolase activity//molecular_function//catalytic activity	no KO assigned | (RefSeq) type I inositol polyphosphate 5-phosphatase 4	http://www.genome.jp/dbget-bin/www_bget?sot:102594999	-	Inositol polyphosphate-related phosphatase||Endonuclease/exonuclease/phosphatase
470	PGSC0003DMG400019466	238.592	638.47	-1.4201	3.2207e-05	0.00040216	DOWN	GO:0055085//GO:0051179//GO:0008150//GO:0051234//GO:0006810//GO:0009987	transmembrane transport//localization//biological_process//establishment of localization//transport//cellular process	GO:0044425//GO:0016021//GO:0031224//GO:0016020//GO:0005575	membrane part//integral component of membrane//intrinsic component of membrane//membrane//cellular_component	--	--	no KO assigned | (RefSeq) hippocampus abundant transcript-like protein 1	http://www.genome.jp/dbget-bin/www_bget?sot:102599762	-	Major facilitator superfamily domain||Major facilitator superfamily
471	PGSC0003DMG400019508	60.2532	398.657	-2.726	1.2027e-05	0.00017072	DOWN	GO:0008150//GO:0043412//GO:0009987//GO:0008152//GO:0015979//GO:0044260//GO:0009765//GO:0071704//GO:0018298//GO:0019684//GO:0044267//GO:0006091//GO:0019538//GO:0044238//GO:0036211//GO:0044237//GO:0006464//GO:0043170	biological_process//macromolecule modification//cellular process//metabolic process//photosynthesis//cellular macromolecule metabolic process//photosynthesis, light harvesting//organic substance metabolic process//protein-chromophore linkage//photosynthesis, light reaction//cellular protein metabolic process//generation of precursor metabolites and energy//protein metabolic process//primary metab…	GO:0098796//GO:0031976//GO:0009536//GO:0044436//GO:0009579//GO:0034357//GO:0043226//GO:0005737//GO:0009507//GO:0005575//GO:0043231//GO:0032991//GO:0031984//GO:0043227//GO:0016020//GO:0009522//GO:0009523//GO:0044434//GO:0009521//GO:0005623//GO:0044444//GO:0009534//GO:0005622//GO:0044464//GO:0031224//GO:0042651//GO:0055035//GO:0044424//GO:0044425//GO:0016021//GO:0044422//GO:0044446//GO:0043229//GO:…	membrane protein complex//plastid thylakoid//plastid//thylakoid part//thylakoid//photosynthetic membrane//organelle//cytoplasm//chloroplast//cellular_component//intracellular membrane-bounded organelle//protein-containing complex//organelle subcompartment//membrane-bounded organelle//membrane//photosystem I//photosystem II//chloroplast part//photosystem//cell//cytoplasmic part//chloroplast thylak…	GO:1901363//GO:0097159//GO:0046906//GO:0016168//GO:0003674//GO:0005488	heterocyclic compound binding//organic cyclic compound binding//tetrapyrrole binding//chlorophyll binding//molecular_function//binding	K08910 light-harvesting complex I chlorophyll a/b binding protein 4 | (RefSeq) cab1; chlorophyll a-b binding protein 4, chloroplastic-like	http://www.genome.jp/dbget-bin/www_bget?sot:102596966	-	Chlorophyll A-B binding protein||Chlorophyll a/b binding protein domain||Chlorophyll A-B binding protein, plant
472	PGSC0003DMG400019582	924.584	1893.16	-1.0339	0.00070948	0.0055794	DOWN	--	--	GO:0005575//GO:0016020//GO:0031224//GO:0016021//GO:0044425	cellular_component//membrane//intrinsic component of membrane//integral component of membrane//membrane part	--	--	no KO assigned | (RefSeq) thylakoid membrane protein slr0575	http://www.genome.jp/dbget-bin/www_bget?sot:102580323	APE1	Protein of unknown function DUF2854
473	PGSC0003DMG400019584	38263.6	85208.7	-1.155	0.0005638	0.0045751	DOWN	GO:0015977//GO:0019253//GO:0044237//GO:0044238//GO:0009058//GO:0043094//GO:0019685//GO:0071704//GO:0009853//GO:1901576//GO:0005975//GO:0015979//GO:0008152//GO:0009987//GO:0055114//GO:0008150//GO:0016051//GO:0044249	carbon fixation//reductive pentose-phosphate cycle//cellular metabolic process//primary metabolic process//biosynthetic process//cellular metabolic compound salvage//photosynthesis, dark reaction//organic substance metabolic process//photorespiration//organic substance biosynthetic process//carbohydrate metabolic process//photosynthesis//metabolic process//cellular process//oxidation-reduction pr…	GO:0043229//GO:0044424//GO:0044464//GO:0005622//GO:0044444//GO:0005623//GO:0043227//GO:0005575//GO:0043231//GO:0005737//GO:0009507//GO:0043226//GO:0009536	intracellular organelle//intracellular part//cell part//intracellular//cytoplasmic part//cell//membrane-bounded organelle//cellular_component//intracellular membrane-bounded organelle//cytoplasm//chloroplast//organelle//plastid	GO:0016984//GO:0004497//GO:0016830//GO:0003674//GO:0016829//GO:0016831//GO:0003824//GO:0016491	ribulose-bisphosphate carboxylase activity//monooxygenase activity//carbon-carbon lyase activity//molecular_function//lyase activity//carboxy-lyase activity//catalytic activity//oxidoreductase activity	K01602 ribulose-bisphosphate carboxylase small chain [EC:4.1.1.39] | (RefSeq) ribulose bisphosphate carboxylase small chain 1, chloroplastic-like	http://www.genome.jp/dbget-bin/www_bget?sot:102577450	-	Ribulose-1,5-bisphosphate carboxylase small subunit, N-terminal||Ribulose bisphosphate carboxylase small chain, domain||Ribulose bisphosphate carboxylase, small chain
474	PGSC0003DMG400019823	396.827	1451.54	-1.871	1.2087e-05	0.00017141	DOWN	GO:0022900//GO:0008152//GO:0015979//GO:0055114//GO:0009987//GO:0008150//GO:0044237//GO:0009773//GO:0019684//GO:0009767//GO:0006091	electron transport chain//metabolic process//photosynthesis//oxidation-reduction process//cellular process//biological_process//cellular metabolic process//photosynthetic electron transport in photosystem I//photosynthesis, light reaction//photosynthetic electron transport chain//generation of precursor metabolites and energy	GO:0043231//GO:0005575//GO:0043227//GO:0016020//GO:0031984//GO:0032991//GO:0009507//GO:0005737//GO:0034357//GO:0009579//GO:0043226//GO:0031976//GO:0098796//GO:0044436//GO:0009536//GO:0043229//GO:0044446//GO:0044422//GO:0009535//GO:0044435//GO:0042651//GO:0044425//GO:0044424//GO:0055035//GO:0005622//GO:0044464//GO:0044434//GO:0010598//GO:0009534//GO:0005623//GO:0044444	intracellular membrane-bounded organelle//cellular_component//membrane-bounded organelle//membrane//organelle subcompartment//protein-containing complex//chloroplast//cytoplasm//photosynthetic membrane//thylakoid//organelle//plastid thylakoid//membrane protein complex//thylakoid part//plastid//intracellular organelle//intracellular organelle part//organelle part//chloroplast thylakoid membrane//p…	--	--	no KO assigned | (RefSeq) photosynthetic NDH subunit of subcomplex B 1, chloroplastic	http://www.genome.jp/dbget-bin/www_bget?sot:102593855	NDF1	-
475	PGSC0003DMG400019971	1780.51	3994.73	-1.1658	0.00012465	0.0012993	DOWN	--	--	--	--	--	--	K12116 flavin-binding kelch repeat F-box protein 1 | (RefSeq) adagio protein 3	http://www.genome.jp/dbget-bin/www_bget?sot:102593553	ADO3	Kelch-type beta propeller||Galactose oxidase/kelch, beta-propeller||F-box domain||Kelch repeat type 2||PAS domain
476	PGSC0003DMG400020141	69.7384	467.241	-2.7441	1.6316e-05	0.00022282	DOWN	GO:0044237//GO:0008152//GO:0015979//GO:0009987//GO:0008150	cellular metabolic process//metabolic process//photosynthesis//cellular process//biological_process	GO:0043229//GO:0016021//GO:0044425//GO:0044424//GO:0005622//GO:0031224//GO:0044464//GO:0009523//GO:0005623//GO:0044444//GO:0009521//GO:0043231//GO:0005575//GO:0043227//GO:0016020//GO:0032991//GO:0009507//GO:0005737//GO:0034357//GO:0009579//GO:0043226//GO:0098796//GO:0044436//GO:0009536	intracellular organelle//integral component of membrane//membrane part//intracellular part//intracellular//intrinsic component of membrane//cell part//photosystem II//cell//cytoplasmic part//photosystem//intracellular membrane-bounded organelle//cellular_component//membrane-bounded organelle//membrane//protein-containing complex//chloroplast//cytoplasm//photosynthetic membrane//thylakoid//organel…	--	--	K02721 photosystem II PsbW protein | (RefSeq) photosystem II reaction center W protein, chloroplastic-like	http://www.genome.jp/dbget-bin/www_bget?sot:102590010	-	Photosystem II PsbW, class 2
477	PGSC0003DMG400020170	1192.82	2479.27	-1.0555	0.00062092	0.0049789	DOWN	GO:0008152//GO:0008150//GO:0055114	metabolic process//biological_process//oxidation-reduction process	--	--	GO:0005506//GO:0046906//GO:0003674//GO:0043167//GO:0016491//GO:0003824//GO:1901363//GO:0097159//GO:0004497//GO:0005488//GO:0046872//GO:0016705//GO:0020037//GO:0046914//GO:0043169	iron ion binding//tetrapyrrole binding//molecular_function//ion binding//oxidoreductase activity//catalytic activity//heterocyclic compound binding//organic cyclic compound binding//monooxygenase activity//binding//metal ion binding//oxidoreductase activity, acting on paired donors, with incorporation or reduction of molecular oxygen//heme binding//transition metal ion binding//cation binding	no KO assigned | (RefSeq) cytochrome P450 82C4-like	http://www.genome.jp/dbget-bin/www_bget?sot:102592814	-	Cytochrome P450, conserved site||Cytochrome P450||Cytochrome P450, E-class, group I
478	PGSC0003DMG400020204	195.535	659.188	-1.7533	0.00091382	0.006888	DOWN	--	--	--	--	--	--	no KO assigned | (RefSeq) pollen allergen Che a 1	http://www.genome.jp/dbget-bin/www_bget?sot:102583450	--	--
479	PGSC0003DMG400020288	141.486	576.263	-2.0261	1.102e-07	2.5881e-06	DOWN	--	--	--	--	--	--	no KO assigned | (RefSeq) uncharacterized LOC102598030	http://www.genome.jp/dbget-bin/www_bget?sot:102598030	-	Protein of unknown function DUF2996
480	PGSC0003DMG400020352	735.098	1473	-1.0027	0.0012579	0.0089532	DOWN	--	--	--	--	--	--	no KO assigned | (RefSeq) OTU domain-containing protein At3g57810	http://www.genome.jp/dbget-bin/www_bget?sot:102582831	-	OTU domain
481	PGSC0003DMG400020363	2110.77	8021.41	-1.9261	1.9796e-10	7.5679e-09	DOWN	GO:0009719//GO:0044237//GO:0006950//GO:0010033//GO:0009725//GO:0009628//GO:0009767//GO:0019684//GO:0009773//GO:0006091//GO:0050896//GO:1901135//GO:0009735//GO:0016311//GO:0044238//GO:0009266//GO:0006793//GO:0015979//GO:0009311//GO:0008152//GO:0005975//GO:0022900//GO:0005984//GO:0071704//GO:0044262//GO:0009409//GO:0030388//GO:0042221//GO:0008150//GO:0006796//GO:0055114//GO:0005985//GO:0019637//GO:…	response to endogenous stimulus//cellular metabolic process//response to stress//response to organic substance//response to hormone//response to abiotic stimulus//photosynthetic electron transport chain//photosynthesis, light reaction//photosynthetic electron transport in photosystem I//generation of precursor metabolites and energy//response to stimulus//carbohydrate derivative metabolic process…	GO:0044424//GO:0044422//GO:0044446//GO:0043229//GO:0048046//GO:0044435//GO:0031967//GO:0044434//GO:0044444//GO:0005623//GO:0005622//GO:0005576//GO:0044464//GO:0010319//GO:0005737//GO:0009507//GO:0005575//GO:0009526//GO:0043231//GO:0043227//GO:0009570//GO:0009536//GO:0043226//GO:0031975//GO:0009532	intracellular part//organelle part//intracellular organelle part//intracellular organelle//apoplast//plastid part//organelle envelope//chloroplast part//cytoplasmic part//cell//intracellular//extracellular region//cell part//stromule//cytoplasm//chloroplast//cellular_component//plastid envelope//intracellular membrane-bounded organelle//membrane-bounded organelle//chloroplast stroma//plastid//org…	GO:0042578//GO:0016787//GO:0042132//GO:0016791//GO:0003674//GO:0019203//GO:0016788//GO:0050308//GO:0003824	phosphoric ester hydrolase activity//hydrolase activity//fructose 1,6-bisphosphate 1-phosphatase activity//phosphatase activity//molecular_function//carbohydrate phosphatase activity//hydrolase activity, acting on ester bonds//sugar-phosphatase activity//catalytic activity	K03841 fructose-1,6-bisphosphatase I [EC:3.1.3.11] | (RefSeq) fructose-1,6-bisphosphatase precursor	http://www.genome.jp/dbget-bin/www_bget?sot:102577434	HCEF1	Fructose-1-6-bisphosphatase class I, N-terminal||Fructose-1,6-bisphosphatase, active site||Fructose-1,6-bisphosphatase class 1||Fructose-1,6-bisphosphatase
482	PGSC0003DMG400020437	6.85974	34.0954	-2.3134	0.0076144	0.038305	DOWN	GO:0009987//GO:0044248//GO:0009056//GO:0055114//GO:0006979//GO:0008150//GO:0008152//GO:0042744//GO:0042743//GO:0050896//GO:0072593//GO:0044237//GO:0006950	cellular process//cellular catabolic process//catabolic process//oxidation-reduction process//response to oxidative stress//biological_process//metabolic process//hydrogen peroxide catabolic process//hydrogen peroxide metabolic process//response to stimulus//reactive oxygen species metabolic process//cellular metabolic process//response to stress	--	--	GO:0097159//GO:1901363//GO:0003824//GO:0016684//GO:0016491//GO:0043167//GO:0003674//GO:0046906//GO:0004601//GO:0043169//GO:0016209//GO:0020037//GO:0046872//GO:0005488	organic cyclic compound binding//heterocyclic compound binding//catalytic activity//oxidoreductase activity, acting on peroxide as acceptor//oxidoreductase activity//ion binding//molecular_function//tetrapyrrole binding//peroxidase activity//cation binding//antioxidant activity//heme binding//metal ion binding//binding	K00430 peroxidase [EC:1.11.1.7] | (RefSeq) peroxidase P7-like	http://www.genome.jp/dbget-bin/www_bget?sot:102582401	-	Haem peroxidase, plant/fungal/bacterial||Secretory peroxidase||Peroxidases heam-ligand binding site||Haem peroxidase||Plant peroxidase
483	PGSC0003DMG400020484	3111.54	6254.46	-1.0073	0.00070465	0.0055473	DOWN	GO:0090407//GO:0009259//GO:0034641//GO:0019693//GO:0009165//GO:0018130//GO:1901135//GO:0009119//GO:0072521//GO:0009116//GO:0034654//GO:0009124//GO:0051179//GO:0009058//GO:0006807//GO:0009150//GO:0046483//GO:0044238//GO:0009205//GO:0046390//GO:1901293//GO:0009167//GO:0009145//GO:0044271//GO:0055085//GO:1901360//GO:0006139//GO:0006753//GO:0042278//GO:0072522//GO:0006812//GO:0009156//GO:0044237//GO:…	organophosphate biosynthetic process//ribonucleotide metabolic process//cellular nitrogen compound metabolic process//ribose phosphate metabolic process//nucleotide biosynthetic process//heterocycle biosynthetic process//carbohydrate derivative metabolic process//ribonucleoside metabolic process//purine-containing compound metabolic process//nucleoside metabolic process//nucleobase-containing com…	GO:0045263//GO:0005623//GO:0005622//GO:0044464//GO:0031224//GO:0045259//GO:0044424//GO:0044425//GO:0016021//GO:0098796//GO:0033177//GO:0016469//GO:0005575//GO:0032991//GO:0016020	proton-transporting ATP synthase complex, coupling factor F(o)//cell//intracellular//cell part//intrinsic component of membrane//proton-transporting ATP synthase complex//intracellular part//membrane part//integral component of membrane//membrane protein complex//proton-transporting two-sector ATPase complex, proton-transporting domain//proton-transporting two-sector ATPase complex//cellular_comp…	GO:0022890//GO:0008324//GO:0015075//GO:0005215//GO:0015078//GO:0022857//GO:0015077//GO:0003674	inorganic cation transmembrane transporter activity//cation transmembrane transporter activity//ion transmembrane transporter activity//transporter activity//proton transmembrane transporter activity//transmembrane transporter activity//monovalent inorganic cation transmembrane transporter activity//molecular_function	K02109 F-type H+-transporting ATPase subunit b | (RefSeq) ATP synthase subunit b', chloroplastic-like	http://www.genome.jp/dbget-bin/www_bget?sot:102584964	-	ATP synthase, F0 complex, subunit b'||ATP synthase, F0 complex, subunit b/b', bacterial/chloroplast
484	PGSC0003DMG400020505	236.997	1201.99	-2.3425	9.0784e-05	0.00098781	DOWN	GO:0044237//GO:0015979//GO:0008152//GO:0009987//GO:0008150	cellular metabolic process//photosynthesis//metabolic process//cellular process//biological_process	GO:0044435//GO:0009535//GO:0044422//GO:0043229//GO:0044446//GO:0044424//GO:0055035//GO:0044425//GO:0042651//GO:0044464//GO:0005622//GO:0009521//GO:0044444//GO:0005623//GO:0009534//GO:0009522//GO:0044434//GO:0032991//GO:0031984//GO:0016020//GO:0043227//GO:0005575//GO:0043231//GO:0005737//GO:0009507//GO:0043226//GO:0009579//GO:0034357//GO:0009536//GO:0044436//GO:0098796//GO:0031976	plastid part//chloroplast thylakoid membrane//organelle part//intracellular organelle//intracellular organelle part//intracellular part//plastid thylakoid membrane//membrane part//thylakoid membrane//cell part//intracellular//photosystem//cytoplasmic part//cell//chloroplast thylakoid//photosystem I//chloroplast part//protein-containing complex//organelle subcompartment//membrane//membrane-bounded…	GO:0005488//GO:0016168//GO:0003674//GO:0046906//GO:0097159//GO:1901363	binding//chlorophyll binding//molecular_function//tetrapyrrole binding//organic cyclic compound binding//heterocyclic compound binding	K02698 photosystem I subunit X | (RefSeq) photosystem I reaction center subunit psaK, chloroplastic	http://www.genome.jp/dbget-bin/www_bget?sot:102602341	PSAK	Photosystem I PsaG/PsaK protein||Photosystem I PsaG/PsaK domain||Photosystem I reaction centre subunit psaK, chloroplastic||Photosystem I PsaG/PsaK, plant
485	PGSC0003DMG400020514	111.69	238.365	-1.0937	0.0047668	0.026421	DOWN	GO:0006810//GO:0051234//GO:0008150//GO:0051179	transport//establishment of localization//biological_process//localization	GO:0016020//GO:0005575//GO:0031224//GO:0016021//GO:0044425	membrane//cellular_component//intrinsic component of membrane//integral component of membrane//membrane part	GO:0003674//GO:0005215	molecular_function//transporter activity	no KO assigned | (RefSeq) protein NRT1/ PTR FAMILY 7.3-like	http://www.genome.jp/dbget-bin/www_bget?sot:102598449	NRT1.5	Proton-dependent oligopeptide transporter family||Major facilitator superfamily domain
486	PGSC0003DMG400020543	1306.09	3466.78	-1.4083	4.8605e-06	7.7118e-05	DOWN	GO:0051179//GO:0051234//GO:0006810//GO:0008150//GO:0046907//GO:0051641//GO:0051649	localization//establishment of localization//transport//biological_process//intracellular transport//cellular localization//establishment of localization in cell	GO:0005623//GO:0005622//GO:0044464//GO:0005575	cell//intracellular//cell part//cellular_component	--	--	K15306 Ran-binding protein 1 | (RefSeq) ran-binding protein 1 homolog a	http://www.genome.jp/dbget-bin/www_bget?sot:102600448	-	PH domain-like||Ran binding domain
487	PGSC0003DMG400020569	14464.1	60202.1	-2.0573	1.4561e-11	6.7864e-10	DOWN	--	--	--	--	GO:0043167//GO:0003674//GO:0036094//GO:0032553//GO:0005524//GO:0032550//GO:0035639//GO:0032555//GO:0097159//GO:0030554//GO:1901363//GO:1901265//GO:0097367//GO:0017076//GO:0043168//GO:0032559//GO:0032549//GO:0005488//GO:0001883//GO:0000166//GO:0001882	ion binding//molecular_function//small molecule binding//ribonucleotide binding//ATP binding//purine ribonucleoside binding//purine ribonucleoside triphosphate binding//purine ribonucleotide binding//organic cyclic compound binding//adenyl nucleotide binding//heterocyclic compound binding//nucleoside phosphate binding//carbohydrate derivative binding//purine nucleotide binding//anion binding//ade…	no KO assigned | (RefSeq) ubiquitin-conjugating enzyme E2-like protein	http://www.genome.jp/dbget-bin/www_bget?sot:102577791	-	Ubiquitin-conjugating enzyme, active site||Ubiquitin-conjugating enzyme E2||Ubiquitin-conjugating enzyme/RWD-like
488	PGSC0003DMG400020625	8690.35	22839.8	-1.3941	3.405e-06	5.6138e-05	DOWN	GO:0043170//GO:0019222//GO:0009059//GO:0019219//GO:0044237//GO:0044271//GO:0006139//GO:1901360//GO:0044238//GO:0046483//GO:0090304//GO:0010467//GO:0009058//GO:0006807//GO:0018130//GO:0050794//GO:0034654//GO:0010556//GO:0060255//GO:0034641//GO:0016070//GO:0065007//GO:0010468//GO:0032774//GO:0034645//GO:0006351//GO:0071704//GO:0097659//GO:0006725//GO:2001141//GO:1901576//GO:0044260//GO:0008152//GO:…	macromolecule metabolic process//regulation of metabolic process//macromolecule biosynthetic process//regulation of nucleobase-containing compound metabolic process//cellular metabolic process//cellular nitrogen compound biosynthetic process//nucleobase-containing compound metabolic process//organic cyclic compound metabolic process//primary metabolic process//heterocycle metabolic process//nucle…	GO:0043229//GO:0044424//GO:0044464//GO:0005634//GO:0005622//GO:0005623//GO:0043227//GO:0043231//GO:0005575//GO:0043226	intracellular organelle//intracellular part//cell part//nucleus//intracellular//cell//membrane-bounded organelle//intracellular membrane-bounded organelle//cellular_component//organelle	GO:0005488//GO:0003677//GO:0003700//GO:0003674//GO:0097159//GO:1901363//GO:0003676	binding//DNA binding//DNA-binding transcription factor activity//molecular_function//organic cyclic compound binding//heterocyclic compound binding//nucleic acid binding	K09286 EREBP-like factor | (RefSeq) ethylene-responsive transcription factor RAP2-13	http://www.genome.jp/dbget-bin/www_bget?sot:102591370	-	DNA-binding domain||AP2/ERF domain
489	PGSC0003DMG400020641	372.782	940.654	-1.3353	4.9622e-05	0.00058783	DOWN	--	--	--	--	--	--	K10268 F-box and leucine-rich repeat protein 2/20 | (RefSeq) F-box/LRR-repeat protein 12	http://www.genome.jp/dbget-bin/www_bget?sot:102587561	-	F-box domain||Leucine-rich repeat, cysteine-containing subtype||Leucine-rich repeat domain, L domain-like||Leucine-rich repeat
490	PGSC0003DMG400020654	1654.65	3548.46	-1.1007	0.00029104	0.0026482	DOWN	--	--	--	--	--	--	no KO assigned | (RefSeq) uncharacterized LOC102585688	http://www.genome.jp/dbget-bin/www_bget?sot:102585688	-	Protein of unknown function DUF538
491	PGSC0003DMG400020659	411.405	848.513	-1.0444	0.0014069	0.0098213	DOWN	--	--	--	--	--	--	--	--	--	--
492	PGSC0003DMG400020679	5.87085	45.0897	-2.9412	0.00044122	0.0037436	DOWN	GO:0007017//GO:0009987//GO:0008150	microtubule-based process//cellular process//biological_process	GO:0005875//GO:0030286//GO:0044422//GO:0044446//GO:0043229//GO:0044424//GO:0043232//GO:0044464//GO:0005622//GO:0005623//GO:0043228//GO:0015630//GO:0032991//GO:0005575//GO:1902494//GO:0043226//GO:0044430//GO:0005856	microtubule associated complex//dynein complex//organelle part//intracellular organelle part//intracellular organelle//intracellular part//intracellular non-membrane-bounded organelle//cell part//intracellular//cell//non-membrane-bounded organelle//microtubule cytoskeleton//protein-containing complex//cellular_component//catalytic complex//organelle//cytoskeletal part//cytoskeleton	--	--	no KO assigned | (RefSeq) uncharacterized LOC102602473	http://www.genome.jp/dbget-bin/www_bget?sot:102602473	-	Dynein light chain, type 1/2
493	PGSC0003DMG400020701	144.956	464.644	-1.6805	3.2321e-06	5.3624e-05	DOWN	GO:0009733//GO:0042221//GO:0008150//GO:0009725//GO:0010033//GO:0009719//GO:0050896	response to auxin//response to chemical//biological_process//response to hormone//response to organic substance//response to endogenous stimulus//response to stimulus	--	--	--	--	K14488 SAUR family protein | (RefSeq) auxin-responsive protein SAUR71-like	http://www.genome.jp/dbget-bin/www_bget?sot:102596161	-	Small auxin-up RNA
494	PGSC0003DMG400020743	2397.29	5581.79	-1.2193	0.0016179	0.011013	DOWN	--	--	--	--	GO:0005488//GO:0046872//GO:0043169//GO:0043167//GO:0003674	binding//metal ion binding//cation binding//ion binding//molecular_function	no KO assigned | (RefSeq) protein yippee-like	http://www.genome.jp/dbget-bin/www_bget?sot:102582035	-	Yippee domain||Yippee/Mis18/Cereblon
495	PGSC0003DMG400020785	1678.93	3488.32	-1.055	0.00054627	0.004462	DOWN	GO:0009607//GO:0010035//GO:0002376//GO:0009987//GO:0071229//GO:0050789//GO:0071396//GO:0008150//GO:0042221//GO:0009617//GO:0001101//GO:0023052//GO:0097306//GO:0033993//GO:0033036//GO:0009755//GO:0052545//GO:0009682//GO:0009966//GO:0051707//GO:0071310//GO:0048583//GO:0097305//GO:0042742//GO:0002229//GO:0009620//GO:0050832//GO:0009738//GO:1901701//GO:0043207//GO:0032879//GO:0009737//GO:0051179//GO:…	response to biotic stimulus//response to inorganic substance//immune system process//cellular process//cellular response to acid chemical//regulation of biological process//cellular response to lipid//biological_process//response to chemical//response to bacterium//response to acid chemical//signaling//cellular response to alcohol//response to lipid//macromolecule localization//hormone-mediated s…	GO:0043226//GO:0043231//GO:0005575//GO:0043227//GO:0005634//GO:0005622//GO:0044464//GO:0005623//GO:0043229//GO:0044424	organelle//intracellular membrane-bounded organelle//cellular_component//membrane-bounded organelle//nucleus//intracellular//cell part//cell//intracellular organelle//intracellular part	GO:0097159//GO:1901363//GO:0003676//GO:0003674//GO:0003677//GO:0005488	organic cyclic compound binding//heterocyclic compound binding//nucleic acid binding//molecular_function//DNA binding//binding	no KO assigned | (RefSeq) protein OVEREXPRESSOR OF CATIONIC PEROXIDASE 3	http://www.genome.jp/dbget-bin/www_bget?sot:102588193	OCP3	Homeobox domain-like||Homeobox domain
496	PGSC0003DMG400020909	1138.42	2688.91	-1.24	5.6582e-05	0.00066029	DOWN	GO:0044260//GO:0071704//GO:0006793//GO:0008152//GO:0006796//GO:0009987//GO:0008150//GO:0043412//GO:0006464//GO:0043170//GO:0016310//GO:0044237//GO:0019538//GO:0036211//GO:0006468//GO:0044238//GO:0044267	cellular macromolecule metabolic process//organic substance metabolic process//phosphorus metabolic process//metabolic process//phosphate-containing compound metabolic process//cellular process//biological_process//macromolecule modification//cellular protein modification process//macromolecule metabolic process//phosphorylation//cellular metabolic process//protein metabolic process//protein modi…	GO:0005575//GO:0016020//GO:0016021//GO:0044425//GO:0031224	cellular_component//membrane//integral component of membrane//membrane part//intrinsic component of membrane	GO:0036094//GO:0003674//GO:0043167//GO:0032555//GO:0035639//GO:0032550//GO:0016301//GO:0005524//GO:0032553//GO:0097159//GO:0016740//GO:1901363//GO:0003824//GO:0030554//GO:0017076//GO:0097367//GO:1901265//GO:0005488//GO:0032549//GO:0032559//GO:0043168//GO:0016773//GO:0004674//GO:0004672//GO:0016772//GO:0001882//GO:0000166//GO:0001883	small molecule binding//molecular_function//ion binding//purine ribonucleotide binding//purine ribonucleoside triphosphate binding//purine ribonucleoside binding//kinase activity//ATP binding//ribonucleotide binding//organic cyclic compound binding//transferase activity//heterocyclic compound binding//catalytic activity//adenyl nucleotide binding//purine nucleotide binding//carbohydrate derivativ…	no KO assigned | (RefSeq) putative serine/threonine-protein kinase	http://www.genome.jp/dbget-bin/www_bget?sot:102586933	-	Serine/threonine-protein kinase, active site||Protein kinase, ATP binding site||Protein kinase domain||Protein kinase-like domain||Serine-threonine/tyrosine-protein kinase, catalytic domain
497	PGSC0003DMG400020950	4597.65	10180.5	-1.1468	0.00014277	0.0014545	DOWN	--	--	GO:0016020//GO:0005575//GO:0031224//GO:0044425//GO:0016021	membrane//cellular_component//intrinsic component of membrane//membrane part//integral component of membrane	--	--	no KO assigned | (RefSeq) uncharacterized membrane protein C776.05-like	http://www.genome.jp/dbget-bin/www_bget?sot:102596165	-	Protein of unknown function DUF2838
498	PGSC0003DMG400021074	11.4726	58.767	-2.3568	0.010418	0.048693	DOWN	--	--	--	--	--	--	no KO assigned | (RefSeq) uncharacterized LOC102585332	http://www.genome.jp/dbget-bin/www_bget?sot:102585332	-	Domain of unknown function DUF1985
499	PGSC0003DMG400021144	2109.55	5401.35	-1.3564	0.00014617	0.0014857	DOWN	GO:0044237//GO:0008150//GO:0009987//GO:0008152//GO:0015979	cellular metabolic process//biological_process//cellular process//metabolic process//photosynthesis	GO:0009522//GO:0009521//GO:0005623//GO:0044444//GO:0005622//GO:0044464//GO:0031224//GO:0044424//GO:0044425//GO:0043229//GO:0016021//GO:0098796//GO:0009536//GO:0044436//GO:0034357//GO:0009579//GO:0043226//GO:0009507//GO:0005737//GO:0043231//GO:0005575//GO:0009538//GO:0032991//GO:0043227//GO:0016020	photosystem I//photosystem//cell//cytoplasmic part//intracellular//cell part//intrinsic component of membrane//intracellular part//membrane part//intracellular organelle//integral component of membrane//membrane protein complex//plastid//thylakoid part//photosynthetic membrane//thylakoid//organelle//chloroplast//cytoplasm//intracellular membrane-bounded organelle//cellular_component//photosystem …	--	--	K02694 photosystem I subunit III | (RefSeq) photosystem I reaction center subunit III, chloroplastic-like	http://www.genome.jp/dbget-bin/www_bget?sot:102585281	PSAF	Photosystem I PsaF, reaction centre subunit III
500	PGSC0003DMG400021201	20.2745	110.742	-2.4495	1.0976e-05	0.00015746	DOWN	--	--	--	--	--	--	no KO assigned | (RefSeq) protein POLAR LOCALIZATION DURING ASYMMETRIC DIVISION AND REDISTRIBUTION-like	http://www.genome.jp/dbget-bin/www_bget?sot:102598190	--	--
501	PGSC0003DMG400021301	19.7418	126.116	-2.6754	5.7853e-07	1.1517e-05	DOWN	--	--	--	--	--	--	no KO assigned | (RefSeq) protein LIGHT-DEPENDENT SHORT HYPOCOTYLS 10-like	http://www.genome.jp/dbget-bin/www_bget?sot:102584680	-	ALOG domain
[truncated: 299 more rows]
